# Supplementary material for: A facile approach to the synthesis of structurally diverse 6,8a-dihydropyrido[2,3-d]pyrimidine derivatives via a three-component domino reaction
Source: Royal Society of Chemistry journal article supplement (doi:10.1039/c5ob01484k), 2015-01-01
Supplement: c5ob01484k1.pdf [file c5ob01484k1.pdf]

## Electronic Supplementary Information

### **A facile approach to the synthesis of structurally diverse 6,8a-dihydropyrido[2,3-d]pyrimidine derivatives via a three-component domino reaction**

Yuvaraj Dommaraju,<sup>a,b</sup> Shruti Bora,<sup>a</sup> and Dipak Prajapati<sup>a,b\*</sup>

<sup>a</sup>Medicinal Chemistry Division, CSIR-North-East Institute of Science and Technology, Jorhat, Assam  
785006, India.

<sup>b</sup>Academy of Scientific and Innovative Research, New Delhi, India

E-mail: dr\_dprijapati2003@yahoo.co.uk

#### ***Table of Contents:***

|                                       |    |
|---------------------------------------|----|
| General Information.....              | 2  |
| Experimental Data.....                | 2  |
| Characterization of the Products..... | 2  |
| NMR Spectra of the Products.....      | 14 |

## General information

All the commercially available reagents were used as received. Melting points are uncorrected. IR Spectra were recorded on a SHIMADZU FTIR-8400 instrument. NMR spectra were recorded on Avance DPX 300 MHz FT-NMR spectrometer and Avance DPX 500 MHz FT-NMR using tetramethylsilane (TMS) as an internal standard. Mass spectra were recorded on ESQUIRE 3000 Mass spectrometer. All the experiments were monitored by thin layer chromatography (TLC). TLC was performed on pre-coated silica gel plates (Merck). After elution, plate was visualized under UV illumination at 254 nm for UV active materials. Further visualization was achieved by staining KMnO<sub>4</sub> warming in a hot air oven.

## Experimental Data

**General procedure for the synthesis of 6,8a-dihydropyrido[2,3-*d*]pyrimidine derivatives (4a-4w):** In a 50 mL round bottom flask a mixture of 6-aminouracil **1** (1 mmol), alkylsulfonyl acetonitrile **2** (1 mmol), and aromatic aldehyde **3** (1 mmol), and 8 mL of ethanol was heated under reflux in the presence of 30 mol% of NEt<sub>3</sub> till the completion of the reaction as indicated by TLC. After completion of the reaction, the reaction mixture was cooled to room temperature. The formed solids were collected and washed with a little cold ethanol to give the pure product (**4a-4w**).

## Characterization of the Products

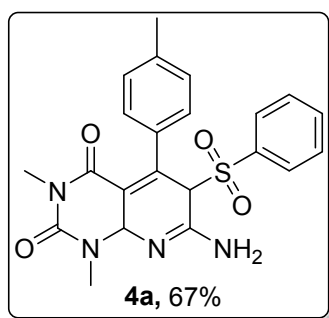

**7-amino-1,3-dimethyl-6-(phenylsulfonyl)-5-(*p*-tolyl)-6,8a-dihydropyrido[2,3-*d*]pyrimidine-2,4(1*H*,3*H*)-dione (4a):** White solid (yield 67%); mp: 281.2-282.2 °C; IR (KBr,  $\nu$ / cm<sup>-1</sup>): 3397, 2932, 2816, 2730, 1610, 1507, 1486, 1446, 1385, 1352, 1320, 1281, 1249, 1213, 1174, 1138, 1080, 927, 810, 758, 708; <sup>1</sup>H NMR (300 MHz, DMSO)  $\delta$  8.71 (s, 1H), 8.34 (s, 1H), 7.71 – 7.61 (m, 3H), 7.51 (t,  $J = 7.7$  Hz, 2H), 7.09 (d,  $J = 7.9$  Hz, 2H), 6.92 (d,  $J = 7.9$  Hz, 2H), 4.51 (s, 1H), 4.34 (s, 1H), 3.02 (s, 6H), 2.23 (s, 3H); <sup>13</sup>C NMR (75 MHz, DMSO)  $\delta$  161.09, 159.01, 153.42, 151.42, 137.39, 137.10, 136.53, 134.68, 129.92, 129.08, 128.99, 127.06, 88.01, 68.15, 36.35, 29.51, 27.59, 21.00; MS (LCMS,  $m/z$ ) 439.1 [M]<sup>+</sup>; Anal. Calcd. For C<sub>22</sub>H<sub>22</sub>N<sub>4</sub>O<sub>4</sub>S: C, 60.26; H, 5.06; N, 12.78. Found C, 60.21; H, 5.07; N, 12.79.

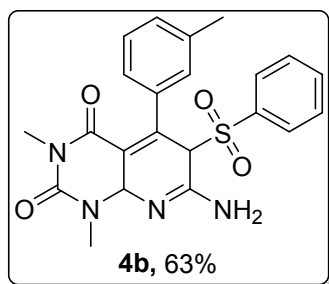

**7-amino-1,3-dimethyl-6-(phenylsulfonyl)-5-(*m*-tolyl)-6,8a-dihydropyrido[2,3-*d*]pyrimidine-2,4(1*H*,3*H*)-dione (4b):** White solid (yield 63%); mp: 284.6-285.6 °C; IR (KBr,  $\nu/\text{cm}^{-1}$ ): 3359, 3208, 3090, 2952, 2921, 2759, 2364, 1686, 1662, 1623, 1552, 1473, 1414, 1366, 1322, 1280, 1245, 1201, 1179, 1160, 1138, 1082, 1040, 987, 922, 883, 852, 804, 781, 760;  $^1\text{H}$  NMR (300 MHz, DMSO)  $\delta$  8.72 (s, 1H), 8.31 (s, 1H), 7.66 (dd,  $J = 13.7, 7.3$  Hz, 3H), 7.51 (t,  $J = 7.7$  Hz, 2H), 7.17 (t,  $J = 7.6$  Hz, 1H), 7.05 (d,  $J = 7.5$  Hz, 1H), 6.88 – 6.77 (m, 2H), 4.51 (s, 1H), 4.34 (s, 1H), 3.02 (s, 6H), 2.25 (s, 3H);  $^{13}\text{C}$  NMR (75 MHz, DMSO)  $\delta$  161.09, 158.99, 153.49, 151.43, 140.45, 138.57, 136.51, 134.70, 129.30, 129.08, 129.01, 128.54, 127.75, 124.21, 87.81, 68.13, 36.68, 29.52, 27.60, 21.48; MS (LCMS,  $m/z$ ) 439.2  $[\text{M}]^+$ ; Anal. Calcd. For  $\text{C}_{22}\text{H}_{22}\text{N}_4\text{O}_4\text{S}$ : C, 60.26; H, 5.06; N, 12.78. Found C, 60.23; H, 5.06; N, 12.76.

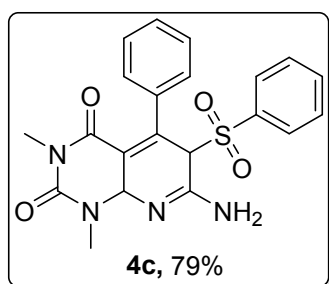

**7-amino-1,3-dimethyl-5-phenyl-6-(phenylsulfonyl)-6,8a-dihydropyrido[2,3-*d*]pyrimidine-2,4(1*H*,3*H*)-dione (4c):** White solid (yield 79%); mp: 306.1-307.1 °C; IR (KBr,  $\nu/\text{cm}^{-1}$ ): 3379, 3201, 2931, 1677, 1661, 1633, 1619, 1569, 1477, 1447, 1415, 1393, 1354, 1323, 1310, 1286, 1249, 1212, 1184, 1137, 1082, 1038, 943, 892, 857, 777, 758, 709;  $^1\text{H}$  NMR (300 MHz, DMSO)  $\delta$  8.75 (s, 1H), 8.36 (s, 1H), 7.66 (d,  $J = 7.1$  Hz, 3H), 7.53 (d,  $J = 7.4$  Hz, 2H), 7.35 – 7.21 (m, 3H), 7.06 (d,  $J = 7.3$  Hz, 2H), 4.57 (s, 1H), 4.39 (s, 1H), 3.04 (s, 6H);  $^{13}\text{C}$  NMR (75 MHz, DMSO)  $\delta$  161.13, 159.02, 153.53, 151.43, 140.46, 136.52, 134.71, 129.41, 129.11, 129.02, 127.88, 127.20, 87.86, 68.03, 36.73, 29.53, 27.62; MS (LCMS,  $m/z$ ) 425.1  $[\text{M}]^+$ ; Anal. Calcd. For  $\text{C}_{21}\text{H}_{20}\text{N}_4\text{O}_4\text{S}$ : C, 59.42; H, 4.75; N, 13.20; Found C, 59.40; H, 4.76; N, 13.22.

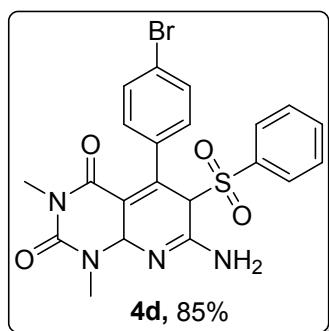

**7-amino-5-(4-bromophenyl)-1,3-dimethyl-6-(phenylsulfonyl)-6,8a-dihydropyrido[2,3-*d*]pyrimidine-2,4(1*H*,3*H*)-dione (4d):** White solid (yield 85%); mp: 282.0-283.0 °C; IR (KBr,  $\nu/\text{cm}^{-1}$ ): 3385, 392, 3064, 2921, 1776, 1686, 1659, 1621, 1560, 1484, 1447, 1416, 1367, 1321, 1282, 1247, 1209, 1173, 1139, 1081, 1035, 985, 939, 894, 857, 808, 776, 755, 727;  $^1\text{H}$  NMR (300 MHz, DMSO)  $\delta$  8.78 (s, 1H), 8.35 (s, 1H), 7.65 (d,  $J = 7.9$  Hz, 3H), 7.51 (t,  $J = 8.2$  Hz, 4H), 7.01 (d,  $J = 8.3$  Hz, 2H), 4.53 (s, 1H), 4.39 (s, 1H), 3.02 (s, 3H), 3.01 (s, 3H);  $^{13}\text{C}$  NMR (75 MHz, DMSO)  $\delta$  161.08, 158.91, 153.60, 151.39, 139.75, 136.39, 134.78, 132.31, 129.51, 129.11, 129.04, 121.04, 87.38, 67.67, 36.29, 29.53, 27.62; MS (LCMS,  $m/z$ ) 504.3 [M]<sup>+</sup>; Anal. Calcd. For C<sub>21</sub>H<sub>19</sub>BrN<sub>4</sub>O<sub>4</sub>S: C, 50.11; H, 3.80; N, 11.13. Found C, 50.09; H, 3.81; N, 11.12.

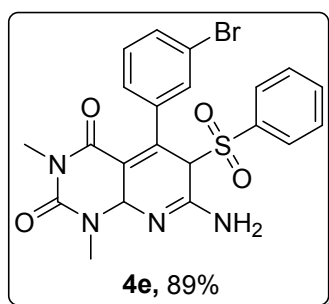

**7-amino-5-(3-bromophenyl)-1,3-dimethyl-6-(phenylsulfonyl)-6,8a-dihydropyrido[2,3-*d*]pyrimidine-2,4(1*H*,3*H*)-dione (4e):** White solid (yield 89%); mp: 272.1-273.1 °C; IR (KBr,  $\nu/\text{cm}^{-1}$ ): 3398, 3328, 3288, 3234, 3050, 2937, 1679, 1660, 1619, 1555, 1475, 1442, 1393, 1362, 1322, 1278, 1234, 1173, 1146, 1082, 1030, 998, 936, 889, 782, 772, 758, 735;  $^1\text{H}$  NMR (300 MHz, DMSO)  $\delta$  8.82 (s, 1H), 8.33 (s, 1H), 7.73 – 7.60 (m, 3H), 7.56 – 7.43 (m, 3H), 7.28 (t,  $J = 7.8$  Hz, 1H), 7.19 (s, 1H), 7.08 (d,  $J = 7.7$  Hz, 1H), 4.55 (s, 1H), 4.43 (s, 1H), 3.03 (s, 3H), 3.01 (s, 3H);  $^{13}\text{C}$  NMR (75 MHz, DMSO)  $\delta$  161.11, 158.96, 153.69, 151.40, 143.18, 136.40, 134.79, 131.68, 130.92, 129.80, 129.12, 129.07, 126.45, 122.58, 87.21, 67.57, 36.49, 29.56, 27.64; MS (LCMS,  $m/z$ ) 504.3 [M]<sup>+</sup>; Anal. Calcd. For C<sub>21</sub>H<sub>19</sub>BrN<sub>4</sub>O<sub>4</sub>S: C, 50.11; H, 3.80; N, 11.13. Found C, 50.10; H, 3.82; N, 11.11.

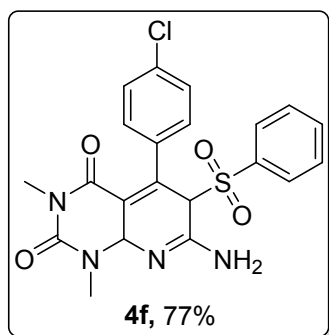

**7-amino-5-(4-chlorophenyl)-1,3-dimethyl-6-(phenylsulfonyl)-6,8a-dihydropyrido[2,3-*d*]pyrimidine-2,4(1*H*,3*H*)-dione (4f):** White solid (yield 77%); mp: 290.8-291.8 °C; IR (KBr,  $\nu/\text{cm}^{-1}$ ): 3638, 3534, 3454, 3374, 3227, 2931, 1682, 1668, 1615, 1555, 1486, 1447, 1422, 1396, 1352, 1325, 1280, 1251, 1214, 1174, 1140, 1081, 1035, 1016, 899, 863, 840, 779, 757, 730;  $^1\text{H}$  NMR (300 MHz, DMSO)  $\delta$  8.78 (s, 1H), 8.35 (s, 1H), 7.65 (d,  $J = 7.9$  Hz, 3H), 7.51 (t,  $J = 7.7$  Hz, 2H), 7.36 (d,  $J = 8.4$  Hz, 2H), 7.07 (d,  $J = 8.4$  Hz, 2H), 4.55 (s, 1H), 4.39 (s, 1H), 3.02 (s, 3H), 3.01 (s, 3H);  $^{13}\text{C}$  NMR (75 MHz, DMSO)  $\delta$  161.09, 158.93, 153.59, 151.40, 139.32, 136.40, 134.77, 132.55, 129.38, 129.15, 129.11, 129.04, 87.45, 67.73, 36.21, 29.53, 27.62; MS (LCMS,  $m/z$ ) 460.1 [M]<sup>+</sup>; Anal. Calcd. For  $\text{C}_{21}\text{H}_{19}\text{ClN}_4\text{O}_4\text{S}$ : C, 54.96; H, 4.17; N, 12.21. Found C, 54.98; H, 4.16; N, 12.19.

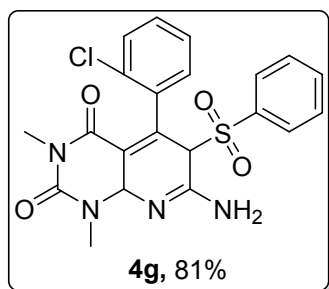

**7-amino-5-(2-chlorophenyl)-1,3-dimethyl-6-(phenylsulfonyl)-6,8a-dihydropyrido[2,3-*d*]pyrimidine-2,4(1*H*,3*H*)-dione (4g):** White solid (yield 81%); mp: 288.5-289.5 °C; IR (KBr,  $\nu/\text{cm}^{-1}$ ): 3399, 3356, 3231, 2948, 2810, 1632, 1595, 1499, 1450, 1384, 1352, 1302, 1213, 1078, 1005, 789, 761;  $^1\text{H}$  NMR (300 MHz, DMSO)  $\delta$  8.71 (s, 1H), 8.33 (s, 1H), 7.72 – 7.65 (m, 3H), 7.56 – 7.49 (m, 3H), 7.29 (t,  $J = 7.5$  Hz, 1H), 7.19 (t,  $J = 7.4$  Hz, 1H), 6.79 (d,  $J = 7.6$  Hz, 1H), 4.97 (s, 1H), 4.36 (s, 1H), 3.04 (s, 6H);  $^1\text{H}$  NMR (300 MHz, DMSO + 2 drops  $\text{D}_2\text{O}$  (Deuterium exchange))  $\delta$  7.72 – 7.65 (m, 3H), 7.56 – 7.49 (m, 3H), 7.29 (t,  $J = 7.3$  Hz, 1H), 7.18 (t,  $J = 7.1$  Hz, 1H), 6.77 (d,  $J = 7.4$  Hz, 1H), 4.97 (s, 1H), 4.37 (s, 1H), 3.04 (s, 6H);  $^{13}\text{C}$  NMR (75 MHz, DMSO)  $\delta$  160.93, 159.02, 154.65, 151.53, 136.75, 136.34, 134.77, 132.83, 130.48, 129.89, 129.26, 129.09, 129.06, 128.13, 86.78, 66.00, 34.05, 29.61, 27.64; MS (LCMS,  $m/z$ ) 460.1 [M]<sup>+</sup>; Anal. Calcd. For  $\text{C}_{21}\text{H}_{19}\text{ClN}_4\text{O}_4\text{S}$ : C, 54.96; H, 4.17; N, 12.21. Found C, 54.94; H, 4.18; N, 12.17.

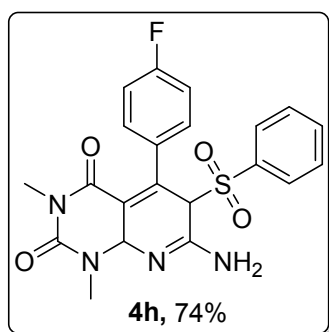

**7-amino-5-(4-fluorophenyl)-1,3-dimethyl-6-(phenylsulfonyl)-6,8a-dihydropyrido[2,3-*d*]pyrimidine-2,4(1*H*,3*H*)-dione (4h):** White solid (yield 74%); mp: 304.5-305.5 °C; IR (KBr,  $\nu/\text{cm}^{-1}$ ): 3375, 3202, 2936, 1678, 1662, 1633, 1573, 1509, 1486, 1457, 1447, 1417, 1385, 1351, 1325, 1307, 1289, 1250, 1228, 1212, 1178, 1161, 1139, 1081, 1035, 932, 895, 861, 837, 804, 789, 758;  $^1\text{H}$  NMR (300 MHz, DMSO)  $\delta$  8.76 (s, 1H), 8.35 (s, 1H), 7.65 (d,  $J = 7.7$  Hz, 3H), 7.51 (t,  $J = 7.7$  Hz, 2H), 7.16 – 7.06 (m, 4H), 4.56 (s, 1H), 4.39 (s, 1H), 3.03 (s, 3H), 3.02 (s, 3H);  $^{13}\text{C}$  NMR (75 MHz, DMSO)  $\delta$  161.11, 158.96, 153.51, 151.42, 136.48, 134.73, 129.27, 129.16, 129.10, 129.02, 116.30, 116.02, 87.83, 67.96, 36.06, 29.51, 27.60; MS (LCMS,  $m/z$ ) 443.1 [M]<sup>+</sup>; Anal. Calcd. For C<sub>21</sub>H<sub>19</sub>FN<sub>4</sub>O<sub>4</sub>S: C, 57.01; H, 4.33; N, 12.66. Found C, 56.95; H, 4.36; N, 12.64.

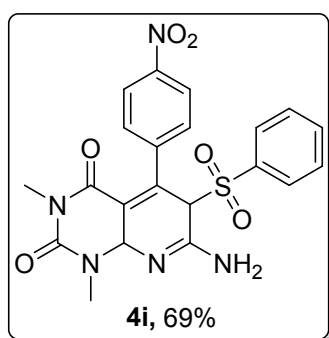

**7-amino-5-(4-nitrophenyl)-1,3-dimethyl-6-(phenylsulfonyl)-6,8a-dihydropyrido[2,3-*d*]pyrimidine-2,4(1*H*,3*H*)-dione (4i):** Yellow solid (yield 69%); mp: 277.7-278.7 °C; IR (KBr,  $\nu/\text{cm}^{-1}$ ): 3466, 3376, 3218, 2933, 2805, 1682, 1607, 1558, 1526, 1486, 1447, 1385, 1352, 1279, 1250, 1219, 1170, 1139, 1079, 1030, 895, 861, 843, 775, 753, 728;  $^1\text{H}$  NMR (300 MHz, DMSO)  $\delta$  8.85 (s, 1H), 8.37 (s, 1H), 8.17 (d,  $J = 8.7$  Hz, 2H), 7.67 (d,  $J = 7.9$  Hz, 3H), 7.53 (t,  $J = 7.7$  Hz, 2H), 7.35 (d,  $J = 8.6$  Hz, 2H), 4.68 (s, 1H), 4.49 (s, 1H), 3.03 (s, 3H), 3.02 (s, 3H);  $^{13}\text{C}$  NMR (75 MHz, DMSO)  $\delta$  161.09, 158.89, 153.81, 151.39, 147.87, 147.35, 136.30, 134.87, 129.15, 129.09, 128.75, 124.62, 86.83, 67.19, 36.74, 29.54, 27.62; MS (LCMS,  $m/z$ ) 470.1 [M]<sup>+</sup>; Anal. Calcd. For C<sub>21</sub>H<sub>19</sub>N<sub>5</sub>O<sub>6</sub>S: C, 53.73; H, 4.08; N, 14.92. Found C, 53.70; H, 4.07; N, 14.95.

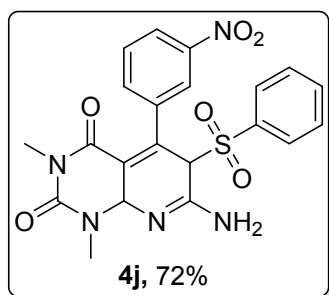

**7-amino-5-(3-nitrophenyl)-1,3-dimethyl-6-(phenylsulfonyl)-6,8a-dihydropyrido[2,3-*d*]pyrimidine-2,4(1*H*,3*H*)-dione (4j):** Yellow solid (yield 72%); mp: 281.4-282.4 °C; IR (KBr,  $\nu/\text{cm}^{-1}$ ): 3376, 3328, 3182, 2931, 1683, 1664, 1622, 1558, 1539, 1488, 1413, 1347, 1326, 1285, 1248, 1216, 1177, 1149, 1139, 1081, 1033, 990, 948, 918, 899, 854, 819, 781, 756, 727;  $^1\text{H}$  NMR (300 MHz, DMSO)  $\delta$  8.90 (s, 1H), 8.35 (s, 1H), 8.13 (d,  $J = 7.8$  Hz, 1H), 7.85 (s, 1H), 7.72 – 7.50 (m, 7H), 4.70 (s, 1H), 4.55 (s, 1H), 3.03 (s, 3H), 3.02 (s, 3H);  $^{13}\text{C}$  NMR (75 MHz, DMSO)  $\delta$  161.12, 158.98, 153.81, 151.38, 148.58, 142.58, 136.35, 134.87, 134.19, 131.14, 129.11, 123.09, 121.78, 86.95, 67.19, 36.49, 29.56, 27.64; MS (LCMS,  $m/z$ ) 470.1 [ $\text{M}$ ] $^+$ ; Anal. Calcd. For  $\text{C}_{21}\text{H}_{19}\text{N}_5\text{O}_6\text{S}$ : C, 53.73; H, 4.08; N, 14.92. Found C, 53.71; H, 4.08; N, 14.91.

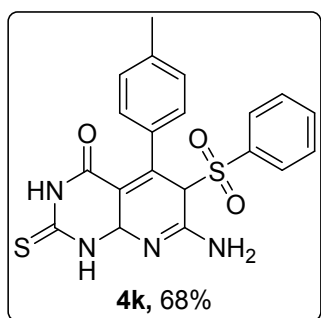

**7-amino-6-(phenylsulfonyl)-2-thioxo-5-(*p*-tolyl)-2,3,6,8a-tetrahydropyrido[2,3-*d*]pyrimidin-4(1*H*)-one (4k):** Pale yellow solid (yield 68%); mp: 306.1-307.1 °C; IR (KBr,  $\nu/\text{cm}^{-1}$ ): 3375, 3207, 2937, 2815, 1678, 1662, 1632, 1574, 1509, 1485, 1458, 1415, 1385, 1352, 1325, 1289, 1251, 1228, 1213, 1178, 1161, 1139, 1100, 1082, 1036, 932, 895, 861, 805, 789, 758, 723;  $^1\text{H}$  NMR (300 MHz, DMSO)  $\delta$  11.94 (s, 1H), 11.75 (s, 1H), 8.65 (s, 1H), 8.15 (s, 1H), 7.83 – 7.71 (m, 3H), 7.59 (t,  $J = 7.6$  Hz, 2H), 7.09 (d,  $J = 7.7$  Hz, 2H), 6.83 (d,  $J = 7.8$  Hz, 2H), 4.33 (s, 1H), 4.31 (s, 1H), 2.22 (s, 3H);  $^{13}\text{C}$  NMR (75 MHz, DMSO)  $\delta$  174.71, 160.80, 159.15, 154.85, 137.27, 137.02, 136.38, 134.96, 130.03, 129.63, 129.04, 126.88, 92.26, 67.61, 35.06, 21.01; MS (LCMS,  $m/z$ ) 427.1 [ $\text{M}$ ] $^+$ ; Anal. Calcd. For  $\text{C}_{20}\text{H}_{18}\text{N}_4\text{O}_3\text{S}_2$ : C, 56.32; H, 4.25; N, 13.14. Found C, 56.30; H, 4.26; N, 13.11.

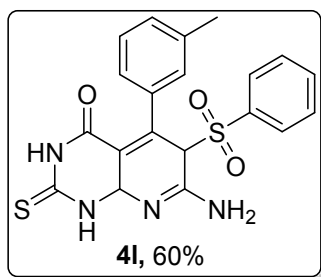

**7-amino-6-(phenylsulfonyl)-2-thioxo-5-(*m*-tolyl)-2,3,6,8a-tetrahydropyrido[2,3-*d*]pyrimidin-4(1*H*)-one (4l):** Pale yellow solid (yield 60%); mp: 316.2-317.2 °C; IR (KBr,  $\nu/\text{cm}^{-1}$ ): 3437, 3313, 3109, 2919, 1641, 1606, 1574, 1524, 1445, 1343, 1306, 1272, 1242, 1221, 1196, 1145, 1080, 998, 967, 851, 809, 776, 748;  $^1\text{H}$  NMR (300 MHz, DMSO)  $\delta$  11.95 (s, 1H), 11.75 (s, 1H), 8.67 (s, 1H), 8.14 (s, 1H), 7.78 (dd,  $J = 12.5, 7.4$  Hz, 3H), 7.60 (t,  $J = 7.6$  Hz, 2H), 7.17 (t,  $J = 7.5$  Hz, 1H), 7.05 (d,  $J = 7.4$  Hz, 1H), 6.80 – 6.70 (m, 2H), 4.36 (s, 1H), 4.33 (s, 1H), 2.23 (s, 3H);  $^{13}\text{C}$  NMR (75 MHz, DMSO)  $\delta$  174.74, 160.83, 159.19, 154.95, 140.08, 138.71, 136.36, 134.97, 129.64, 129.44, 129.07, 128.70, 127.52, 124.05, 92.12, 67.60, 35.39, 21.49; MS (LCMS,  $m/z$ ) 427.1 [M]<sup>+</sup>; Anal. Calcd. For  $\text{C}_{20}\text{H}_{18}\text{N}_4\text{O}_3\text{S}_2$ : C, 56.32; H, 4.25; N, 13.14. Found C, 56.29; H, 4.25; N, 13.13.

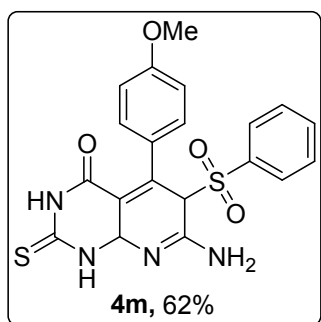

**7-amino-5-(4-methoxyphenyl)-6-(phenylsulfonyl)-2-thioxo-2,3,6,8a-tetrahydropyrido[2,3-*d*]pyrimidin-4(1*H*)-one (4m):** Pale yellow solid (yield 62%); mp: 304.3-305.3 °C; IR (KBr,  $\nu/\text{cm}^{-1}$ ): 3305, 3196, 3125, 2918, 2346, 1962, 1909, 1668, 1648, 1607, 1568, 1547, 1513, 1459, 1445, 1413, 1330, 1270, 1242, 1199, 1178, 1140, 1082, 1045, 1012, 971, 916, 875, 847, 820, 789, 743, 721;  $^1\text{H}$  NMR (300 MHz, DMSO)  $\delta$  11.92 (s, 1H), 11.75 (s, 1H), 8.67 (s, 1H), 8.18 (s, 1H), 7.88 – 7.71 (m, 3H), 7.59 (t,  $J = 7.6$  Hz, 2H), 6.86 (s, 4H), 4.34 (s, 1H), 4.31 (s, 1H), 3.68 (s, 3H); MS (LCMS,  $m/z$ ) 443.1 [M]<sup>+</sup>; Anal. Calcd. For  $\text{C}_{20}\text{H}_{18}\text{N}_4\text{O}_4\text{S}_2$ : C, 54.29; H, 4.10; N, 12.66. Found C, 54.27; H, 4.12; N, 12.68.

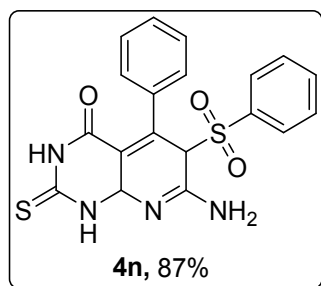



**7-amino-5-phenyl-6-(phenylsulfonyl)-2-thioxo-2,3,6,8a-tetrahydropyrido[2,3-*d*]pyrimidin-4(1*H*)-one (4n):** Pale yellow solid (yield 87%); mp: 323.1-324.1 °C; IR (KBr,  $\nu/\text{cm}^{-1}$ ): 3396, 3091, 2933, 1641, 1607, 1577, 1524, 1465, 1445, 1347, 1302, 1225, 1186, 1151, 1080, 972, 872, 833, 797, 753, 700;  $^1\text{H}$  NMR (300 MHz, DMSO)  $\delta$  11.97 (s, 1H), 11.77 (s, 1H), 8.68 (s, 1H), 8.17 (s, 1H), 7.79 (t,  $J = 8.1$  Hz, 3H), 7.60 (t,  $J = 7.6$  Hz, 2H), 7.28 (dd,  $J = 16.1, 8.8$  Hz, 3H), 6.96 (d,  $J = 7.5$  Hz, 2H), 4.39 (s, 1H), 4.37 (s, 1H);  $^{13}\text{C}$  NMR (75 MHz, DMSO)  $\delta$  174.77, 160.84, 159.17, 154.96, 140.07, 136.35, 135.01, 129.67, 129.54, 129.07, 128.04, 127.00, 92.12, 67.47, 35.44; MS (LCMS,  $m/z$ ) 413.1  $[\text{M}]^+$ ; Anal. Calcd. For  $\text{C}_{19}\text{H}_{16}\text{N}_4\text{O}_3\text{S}_2$ : C, 55.33; H, 3.91; N, 13.58. Found C, 55.31; H, 3.93; N, 13.57.

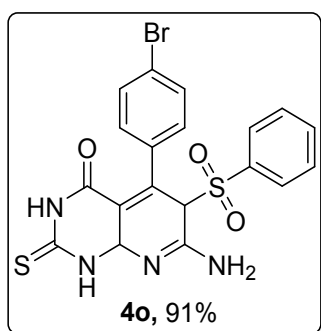

**7-amino-5-(4-bromophenyl)-6-(phenylsulfonyl)-2-thioxo-2,3,6,8a-tetrahydropyrido[2,3-*d*]pyrimidin-4(1*H*)-one (4o):** Pale yellow solid (yield 91%); mp: 303.8-304.8 °C; IR (KBr,  $\nu/\text{cm}^{-1}$ ): 3402, 3310, 3099, 2919, 2857, 2374, 2365, 2338, 1641, 1612, 1557, 1538, 1520, 1485, 1461, 1443, 1345, 1305, 1218, 1196, 1158, 1139, 1075, 1009, 974, 869, 834, 810, 777, 751, 705;  $^1\text{H}$  NMR (300 MHz, DMSO)  $\delta$  11.94 (s, 1H), 11.75 (s, 1H), 8.68 (s, 1H), 8.14 (s, 1H), 7.78 (dd,  $J = 15.3, 7.4$  Hz, 3H), 7.59 (t,  $J = 7.7$  Hz, 2H), 7.50 (d,  $J = 8.3$  Hz, 2H), 6.93 (d,  $J = 8.3$  Hz, 2H), 4.38 (s, 1H), 4.35 (s, 1H); MS (LCMS,  $m/z$ ) 492.0  $[\text{M}]^+$ ; Anal. Calcd. For  $\text{C}_{19}\text{H}_{15}\text{BrN}_4\text{O}_3\text{S}_2$ : C, 46.44; H, 3.08; N, 11.40. Found C, 46.41; H, 3.11; N, 11.42.

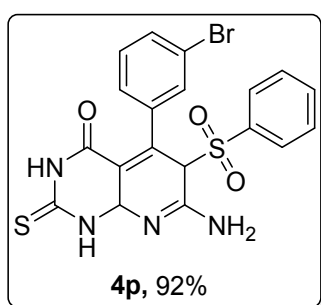

**7-amino-5-(3-bromophenyl)-6-(phenylsulfonyl)-2-thioxo-2,3,6,8a-tetrahydropyrido[2,3-*d*]pyrimidin-4(1*H*)-one (4p):** Pale yellow solid (yield 92%); mp: 301.7-302.7 °C; IR (KBr,  $\nu/\text{cm}^{-1}$ ): 3411, 3305, 3178, 3102, 2917, 1638, 1604, 1570, 1521, 1444, 1340, 1306, 1271, 1223, 1142, 1188, 1079, 997, 964, 882, 859, 834, 805, 772, 752;  $^1\text{H}$  NMR (300 MHz, DMSO)  $\delta$  11.99 (s, 1H), 11.81 (s, 1H), 8.75 (s, 1H), 8.15 (s, 1H), 7.78 (dd,  $J = 13.7, 7.4$  Hz, 3H), 7.60 (t,  $J = 7.5$  Hz, 2H), 7.47 (d,  $J = 7.7$  Hz, 1H), 7.28 (t,  $J = 7.8$  Hz, 1H), 7.10 (s, 1H), 6.99 (d,  $J = 7.5$  Hz, 1H), 4.44 (s, 1H), 4.37 (s, 1H);  $^{13}\text{C}$  NMR (75 MHz, DMSO)  $\delta$  174.90, 160.79, 159.20, 155.06, 142.72, 136.26, 135.06, 131.81, 131.05, 129.67, 129.10, 126.20, 122.64, 91.49, 67.02.

35.13; MS (LCMS,  $m/z$ ) 492.0  $[M]^+$ ; Anal. Calcd. For  $C_{19}H_{15}BrN_4O_3S_2$ : C, 46.44; H, 3.08; N, 11.40. Found C, 46.43; H, 3.10; N, 11.41.

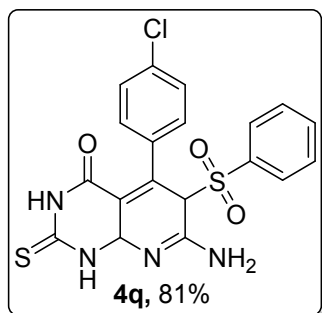

**7-amino-5-(4-chlorophenyl)-6-(phenylsulfonyl)-2-thioxo-2,3,6,8a-tetrahydropyrido[2,3-*d*]pyrimidin-4(1*H*)-one (4p):** Pale yellow solid (yield 81%); mp: 305.3-306.3 °C; IR (KBr,  $\nu$ /  $cm^{-1}$ ): 3401, 3305, 3114, 2916, 1639, 1610, 1561, 1538, 1519, 1492, 1462, 1446, 1347, 1306, 1276, 1227, 1201, 1150, 1140, 1094, 1081, 1014, 975, 872, 847, 818, 752;  $^1H$  NMR (300 MHz, DMSO)  $\delta$  11.98 (s, 1H), 11.79 (s, 1H), 8.72 (s, 1H), 8.17 (s, 1H), 7.78 (dd,  $J = 9.9, 8.3$  Hz, 3H), 7.59 (t,  $J = 7.7$  Hz, 2H), 7.37 (d,  $J = 8.3$  Hz, 2H), 7.00 (d,  $J = 6.9$  Hz, 2H), 4.40 (s, 1H), 4.38 (s, 1H);  $^{13}C$  NMR (75 MHz, DMSO)  $\delta$  174.85, 160.80, 159.16, 154.99, 138.92, 136.25, 135.03, 132.70, 129.66, 129.51, 129.07, 128.98, 91.74, 67.23, 34.92; MS (LCMS,  $m/z$ ) 448.0  $[M]^+$ ; Anal. Calcd. For  $C_{19}H_{15}ClN_4O_3S_2$ : C, 51.06; H, 3.38; N, 12.54. Found C, 51.01; H, 3.39; N, 12.56.

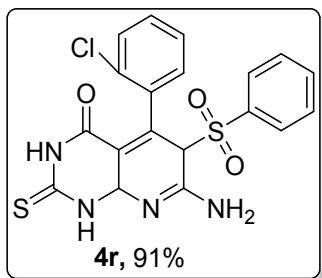

**7-amino-5-(2-chlorophenyl)-6-(phenylsulfonyl)-2-thioxo-2,3,6,8a-tetrahydropyrido[2,3-*d*]pyrimidin-4(1*H*)-one (4q):** Pale yellow solid (yield 91%); mp: 246.5-247.5 °C; IR (KBr,  $\nu$ /  $cm^{-1}$ ): 3437, 3301, 3059, 2943, 2345, 1967, 1897, 1644, 1614, 1570, 1527, 1467, 1445, 1363, 1322, 1274, 1253, 1200, 1182, 1142, 1077, 1050, 1038, 997, 975, 927, 887, 815, 798, 775, 757, 721;  $^1H$  NMR (300 MHz, DMSO)  $\delta$  12.07 (s, 1H), 11.84 (s, 1H), 8.63 (s, 1H), 8.14 (s, 1H), 7.79 (d,  $J = 7.5$  Hz, 3H), 7.63 (t,  $J = 7.5$  Hz, 2H), 7.45 (d,  $J = 7.4$  Hz, 1H), 7.34 – 7.19 (m, 2H), 6.79 (d,  $J = 7.1$  Hz, 1H), 4.77 (s, 1H), 4.35 (s, 1H); MS (LCMS,  $m/z$ ) 448.0  $[M]^+$ ; Anal. Calcd. For  $C_{19}H_{15}ClN_4O_3S_2$ : C, 51.06; H, 3.38; N, 12.54. Found C, 51.07; H, 3.38; N, 12.54.

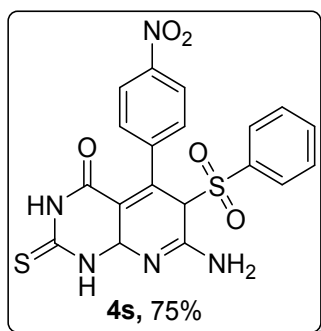

**7-amino-5-(4-nitrophenyl)-6-(phenylsulfonyl)-2-thioxo-2,3,6,8a-tetrahydropyrido[2,3-*d*]pyrimidin-4(1*H*)-one (4s):** Yellow solid (yield 75%); mp: 289.2-290.2 °C; IR (KBr,  $\nu/\text{cm}^{-1}$ ): 3597, 3526, 3190, 3043, 2925, 2852, 1635, 1606, 1575, 1519, 1459, 1445, 1415, 1352, 1321, 1306, 1228, 1158, 1141, 1084, 979, 892, 857, 750;  $^1\text{H}$  NMR (300 MHz, DMSO)  $\delta$  12.02 (s, 1H), 11.83 (s, 1H), 8.78 (s, 1H), 8.19 (s, 2H), 8.16 (s, 1H), 7.79 (dd,  $J = 12.8, 7.2$  Hz, 3H), 7.60 (t,  $J = 7.2$  Hz, 2H), 7.28 (d,  $J = 7.8$  Hz, 2H), 4.52 (s, 1H), 4.49 (s, 1H);  $^{13}\text{C}$  NMR (75 MHz, DMSO)  $\delta$  175.00, 160.76, 159.10, 155.17, 147.42, 136.14, 135.13, 129.70, 129.10, 128.63, 124.76, 91.03, 66.72, 35.40; MS (LCMS,  $m/z$ ) 458.1  $[\text{M}]^+$ ; Anal. Calcd. For  $\text{C}_{19}\text{H}_{15}\text{N}_5\text{O}_5\text{S}_2$ : C, 49.88; H, 3.31; N, 15.31. Found C, 49.90; H, 3.32; N, 15.29.

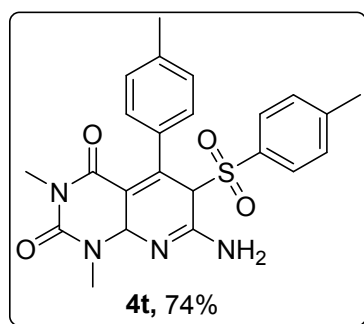

**7-amino-2-thioxo-5-(*p*-tolyl)-6-tosyl-2,3,6,8a-tetrahydropyrido[2,3-*d*]pyrimidin-4(1*H*)-one (4t):** White solid (yield 74%); mp: 317.0-318.0 °C; IR (KBr,  $\nu/\text{cm}^{-1}$ ): 3377, 3323, 3178, 3029, 2936, 2760, 2366, 1929, 1683, 1662, 1627, 1595, 1560, 1463, 1414, 1367, 1341, 1320, 1284, 1248, 1218, 1207, 1179, 1134, 1082, 1033, 956, 946, 898, 860, 817, 809, 782, 761, 725;  $^1\text{H}$  NMR (500 MHz, DMSO)  $\delta$  8.66 (s, 1H), 8.31 (s, 1H), 7.50 (d,  $J = 8.2$  Hz, 2H), 7.32 (d,  $J = 8.1$  Hz, 2H), 7.09 (d,  $J = 8.0$  Hz, 2H), 6.90 (d,  $J = 8.0$  Hz, 2H), 4.45 (s, 1H), 4.26 (s, 1H), 3.04 (s, 3H), 3.03 (s, 3H), 2.32 (s, 3H), 2.23 (s, 3H);  $^{13}\text{C}$  NMR (126 MHz, DMSO)  $\delta$  161.01, 158.99, 153.24, 151.44, 145.97, 137.34, 136.96, 133.28, 129.79, 129.24, 128.92, 126.92, 87.83, 67.91, 36.25, 29.34, 27.50, 21.40, 20.88; MS (LCMS,  $m/z$ ) 441.1  $[\text{M}]^+$ ; Anal. Calcd. For  $\text{C}_{21}\text{H}_{20}\text{N}_4\text{O}_3\text{S}_2$ : C, 57.26; H, 4.58; N, 12.72. Found C, 57.28; H, 4.59; N, 12.74.

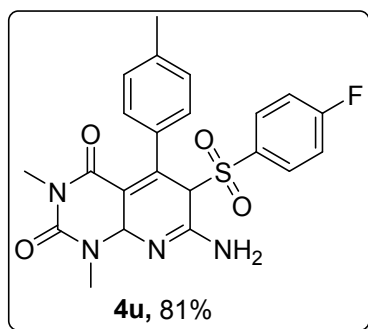

**7-amino-6-((4-fluorophenyl)sulfonyl)-2-thioxo-5-(*p*-tolyl)-2,3,6,8a-tetrahydropyrido[2,3-*d*]pyrimidin-4(1*H*)-one (4u):** White solid (yield 81%); mp: 292.0-293.0 °C; IR (KBr,  $\nu/\text{cm}^{-1}$ ): 3517, 3374, 3201, 3101, 2979, 2931, 2419, 2297, 1682, 1666, 1618, 1588, 1556, 1475, 1422, 1401, 1367, 1328, 1280, 1244, 1211, 1172, 1158, 1138, 1083, 1057, 982, 951, 898, 860, 844, 797, 762, 746, 727;  $^1\text{H}$  NMR (500 MHz, DMSO)  $\delta$  8.74 (s, 1H), 8.35 (s, 1H), 7.70 (dd,  $J = 8.2, 5.0$  Hz, 2H), 7.39 (t,  $J = 8.4$  Hz, 2H), 7.09 (d,  $J = 7.6$  Hz, 2H), 6.92 (d,  $J = 7.8$  Hz, 2H), 4.48 (s, 1H), 4.34 (s, 1H), 3.08 (s, 3H), 3.04 (s, 3H), 2.23 (s, 3H);  $^{13}\text{C}$  NMR (126 MHz, DMSO)  $\delta$  167.01, 164.99, 160.95, 158.89, 153.34, 151.37, 137.07, 132.73, 132.23, 132.15, 129.82, 126.94, 116.33, 116.15, 87.76, 67.90, 56.39, 36.19, 29.42, 27.52, 20.87, 18.85; MS (LCMS,  $m/z$ ) 445.1 [M]<sup>+</sup>; Anal. Calcd. For C<sub>20</sub>H<sub>17</sub>FN<sub>4</sub>O<sub>3</sub>S<sub>2</sub>: C, 54.04; H, 3.86; N, 12.60. Found C, 54.02; H, 3.85; N, 12.61.

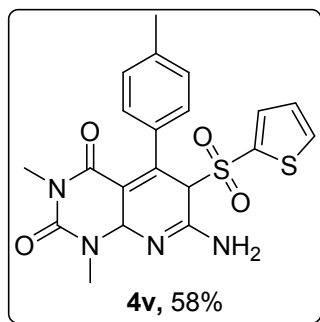

**7-amino-1,3-dimethyl-6-(thiophen-2-ylsulfonyl)-5-(*p*-tolyl)-6,8a-dihydropyrido[2,3-*d*]pyrimidine-2,4(1*H*,3*H*)-dione (4v):** White solid (yield 58%); mp: 276.3-277.3 °C; IR (KBrKBr,  $\nu/\text{cm}^{-1}$ ): 3485, 3372, 3344, 3221, 3097, 2942, 2923, 2414, 2366, 2348, 1910, 1684, 1659, 1549, 1474, 1414, 1397, 1365, 1342, 1283, 1242, 1216, 1175, 1133, 1077, 1018, 983, 934, 891, 853, 798, 760, 748, 727;  $^1\text{H}$  NMR (500 MHz, DMSO)  $\delta$  8.71 (s, 1H), 8.28 (s, 1H), 8.09 (dd,  $J = 5.1, 3.9$  Hz, 1H), 7.54 (d,  $J = 3.8$  Hz, 1H), 7.16 (d,  $J = 4.9$  Hz, 1H), 7.10 (t,  $J = 7.1$  Hz, 2H), 6.91 (dd,  $J = 7.0, 3.5$  Hz, 2H), 4.48 (s, 1H), 4.38 (s, 1H), 3.19 (s, 3H), 3.04 (s, 3H), 2.23 (s, 3H);  $^{13}\text{C}$  NMR (126 MHz, DMSO)  $\delta$  161.00, 158.43, 153.47, 151.58, 137.36, 137.29, 137.03, 136.44, 136.37, 129.84, 128.31, 126.93, 87.68, 68.46, 56.39, 36.52, 29.53, 27.53, 20.88, 18.86; MS (LCMS,  $m/z$ ) 445.1 [M]<sup>+</sup>; Anal. Calcd. For C<sub>20</sub>H<sub>20</sub>N<sub>4</sub>O<sub>4</sub>S<sub>2</sub>: C, 54.04; H, 4.54; N, 12.60. Found C, 54.02; H, 4.55; N, 12.64.

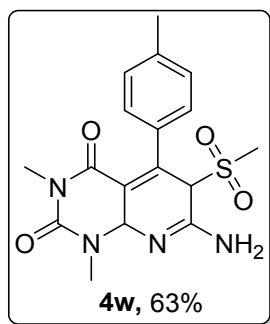

**7-amino-1,3-dimethyl-6-(methylsulfonyl)-5-(*p*-tolyl)-6,8a-dihydropyrido[2,3-*d*]pyrimidine-2,4(1*H*,3*H*)-dione (4w):** White solid (yield 63%); mp: 289.2-290.2 °C; IR (KBr,  $\nu/\text{cm}^{-1}$ ): 3414, 3341, 3320, 3188, 3031, 3005, 2976, 2961, 2924, 2750, 2357, 2346, 1903, 1698, 1655, 1618, 1544, 1511, 1482, 1416, 1364, 1316, 1279, 1244, 1207, 1170, 1140, 1102, 1082, 1055, 1025, 985, 963, 954, 888, 856, 799, 770, 757, 728;  $^1\text{H}$  NMR (500 MHz, DMSO)  $\delta$  8.66 (s, 1H), 8.19 (s, 1H), 7.12 (d,  $J = 7.9$  Hz, 2H), 7.02 (d,  $J = 8.0$  Hz, 2H), 4.64 (s, 1H), 4.20 (s, 1H), 3.48 (s, 3H), 3.13 (s, 3H), 3.10 (s, 3H), 2.25 (s, 3H);  $^{13}\text{C}$  NMR (126 MHz, DMSO)  $\delta$  161.09, 158.99, 154.23, 152.04, 137.61, 136.91, 129.73, 127.09, 88.15, 65.42, 40.93, 34.64, 29.82, 27.72, 20.90; MS (LCMS,  $m/z$ ) 377.1  $[\text{M}]^+$ ; Anal. Calcd. For  $\text{C}_{26}\text{H}_{23}\text{NO}_4$ : C, 54.24; H, 5.36; N, 14.88. Found C, 54.26; H, 5.35; N, 14.86.

# NMR Spectra of the Products

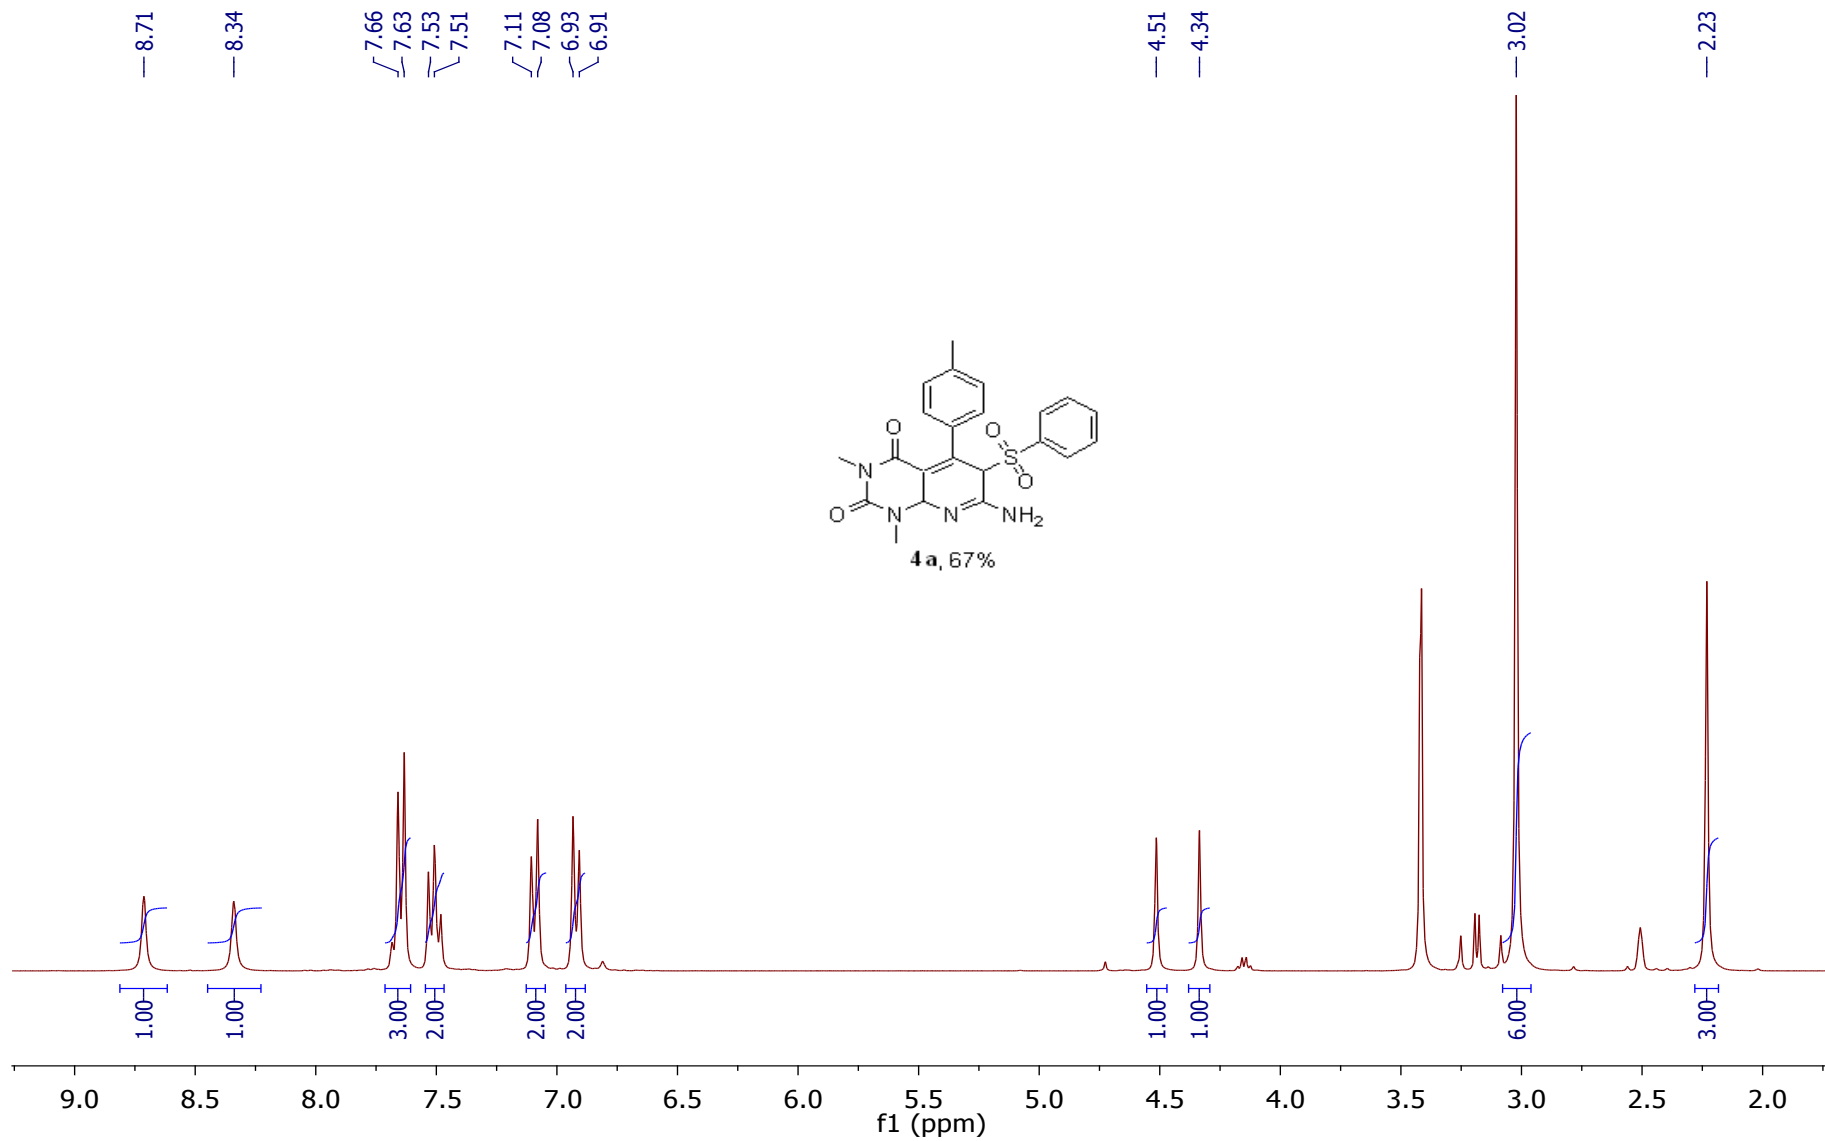

**Fig S-1:** <sup>1</sup>H NMR Spectrum of Product **4a**

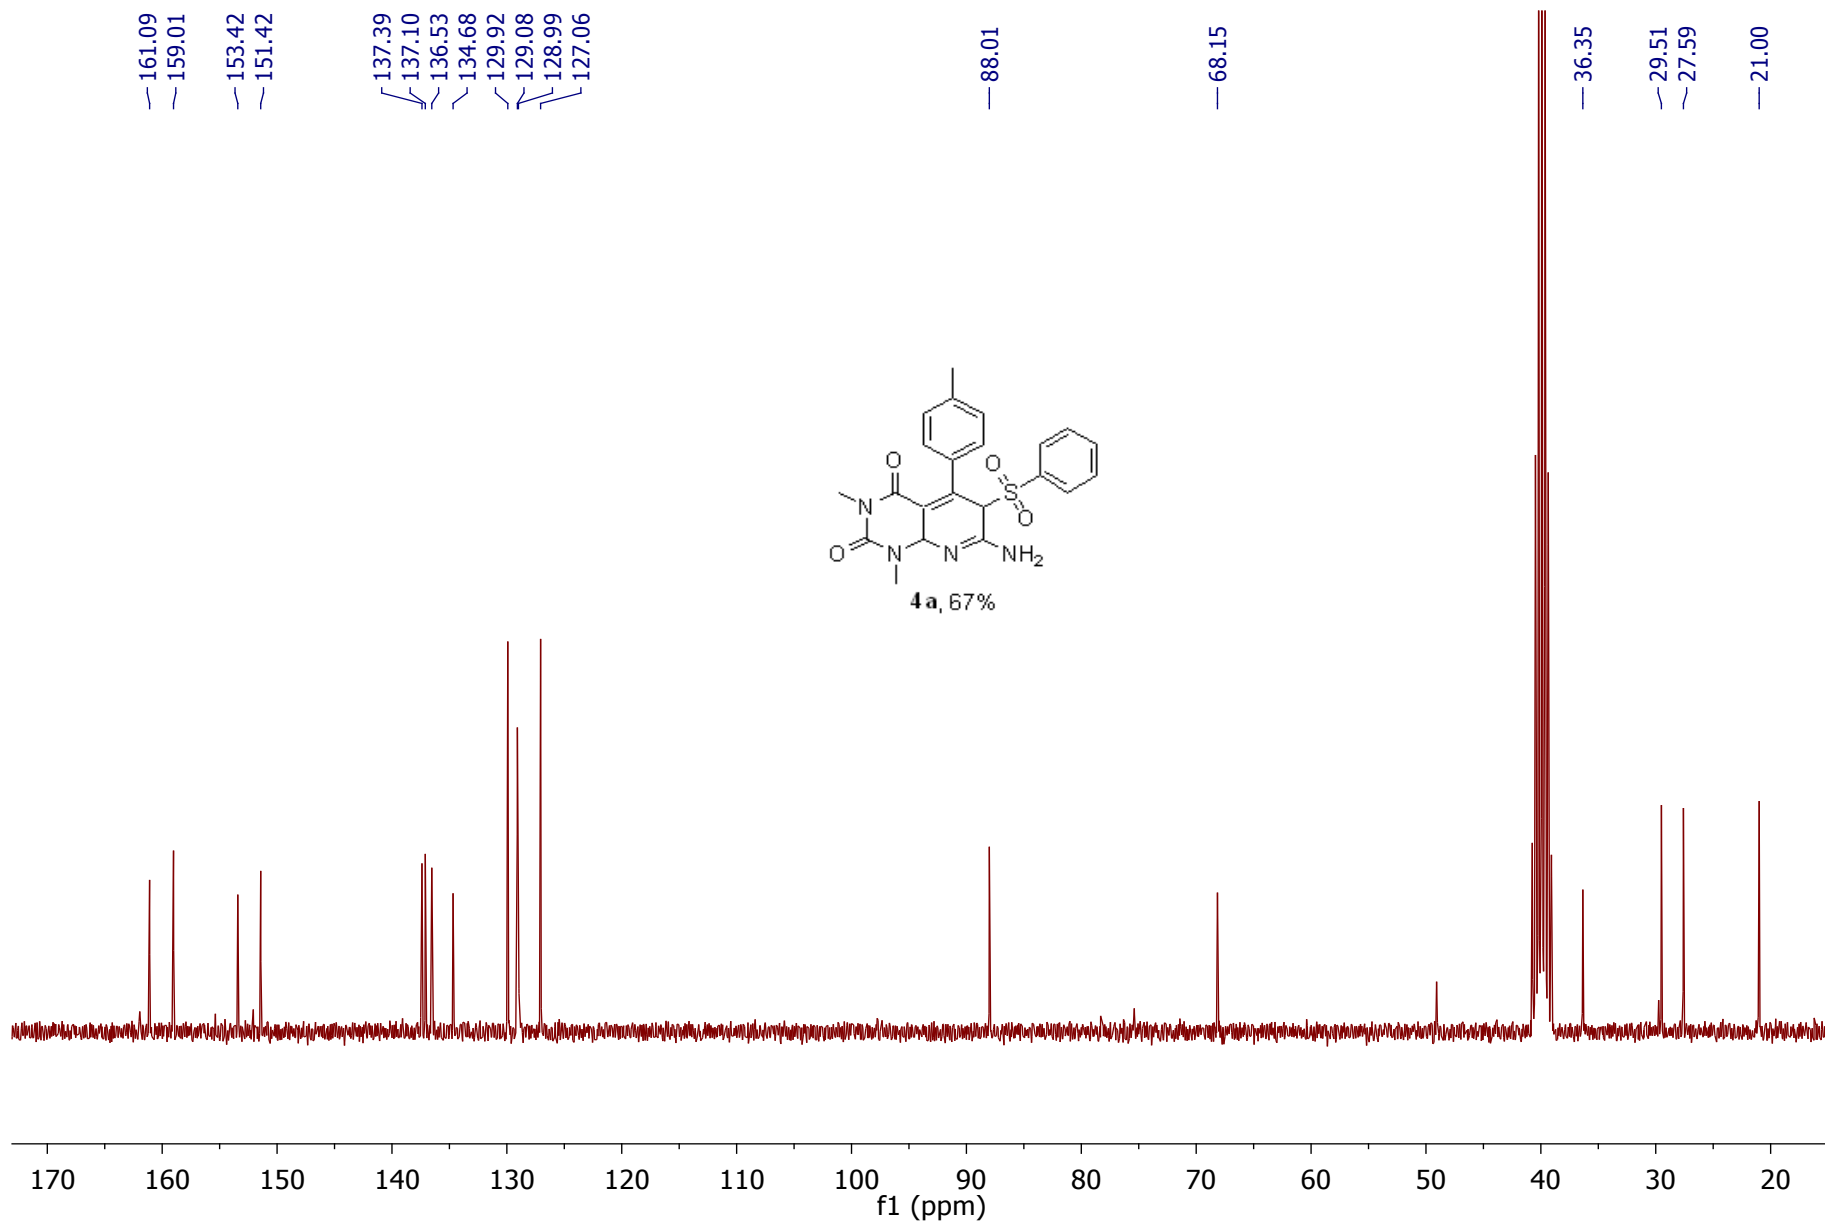

Fig S-2: <sup>13</sup>C NMR Spectrum of Product 4a

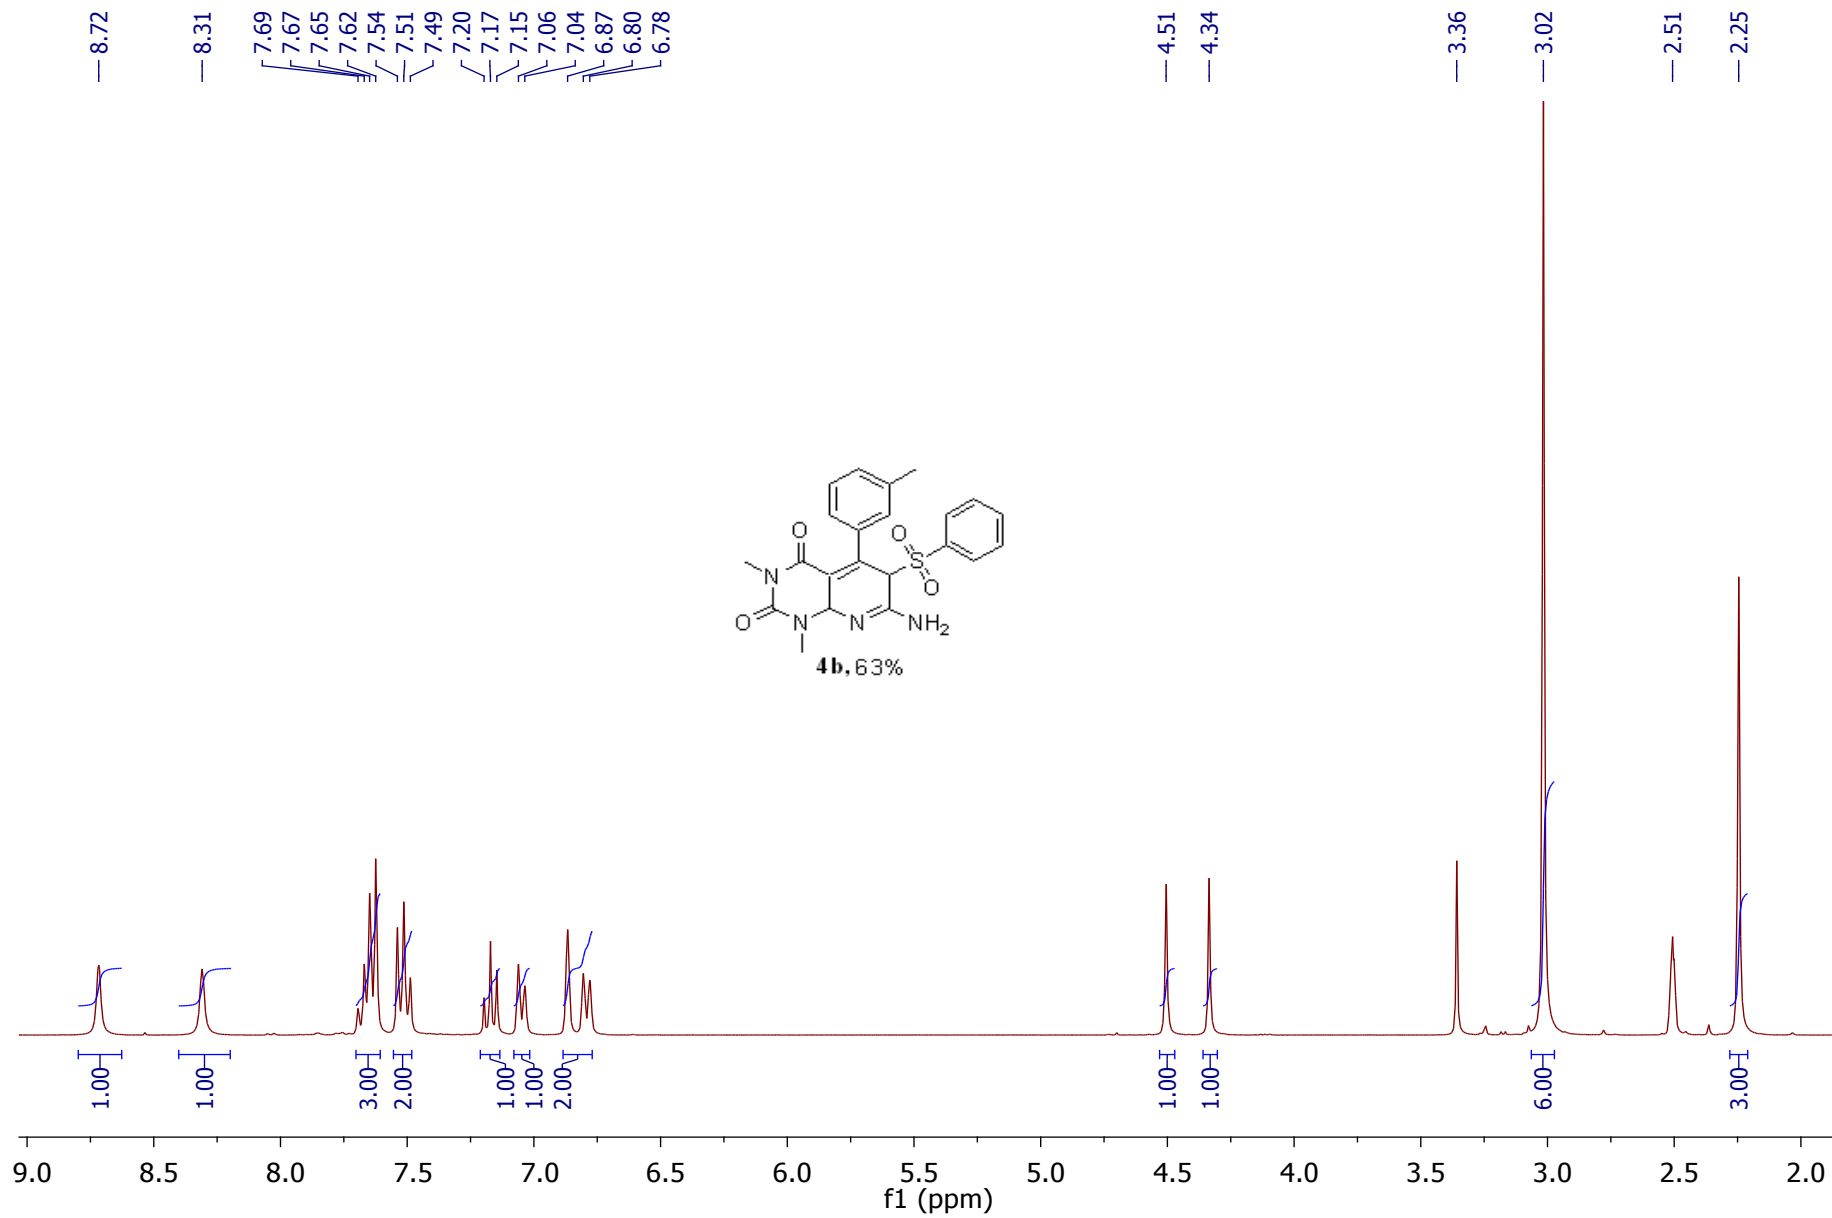

**Fig S-3: <sup>1</sup>H NMR Spectrum of Product **4b****



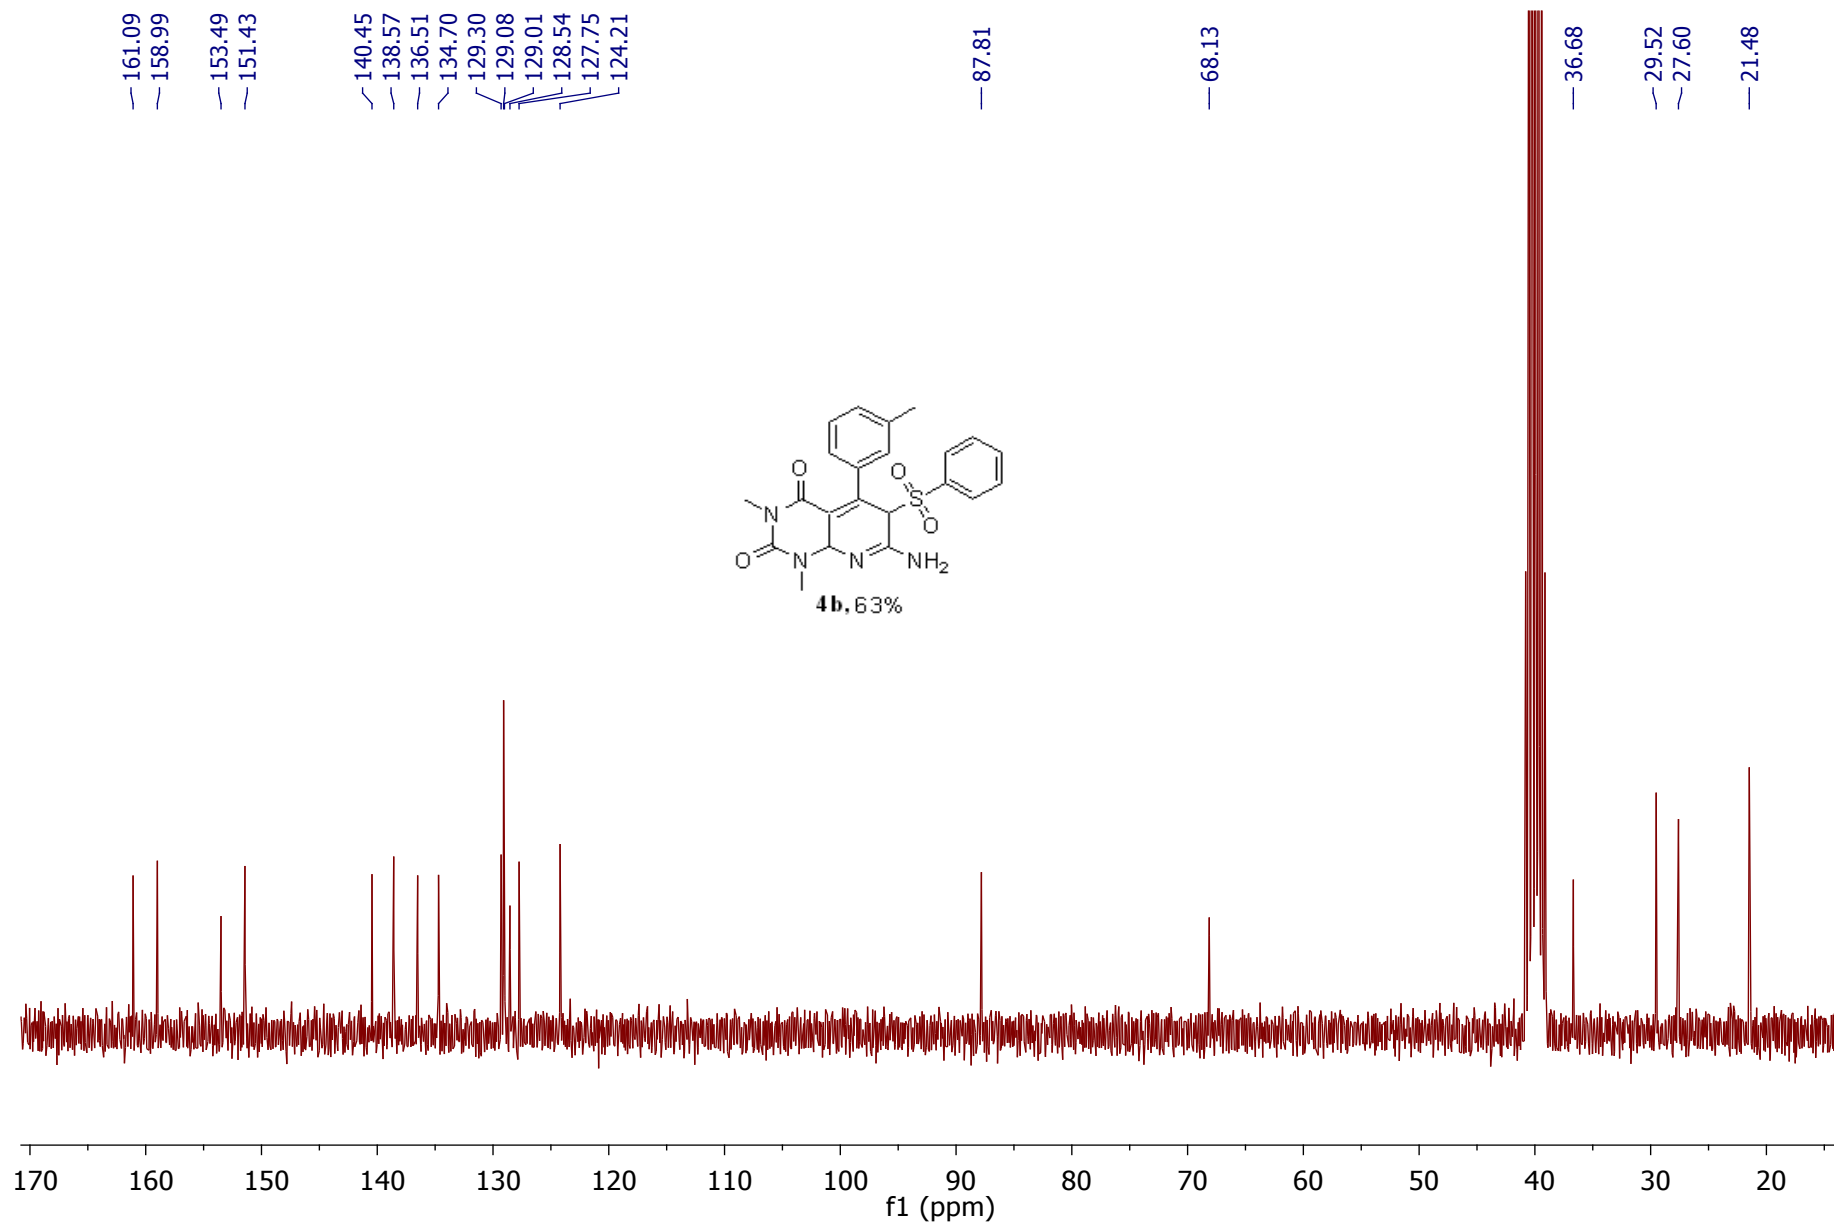

**Fig S-4:** <sup>13</sup>C NMR Spectrum of Product **4b**

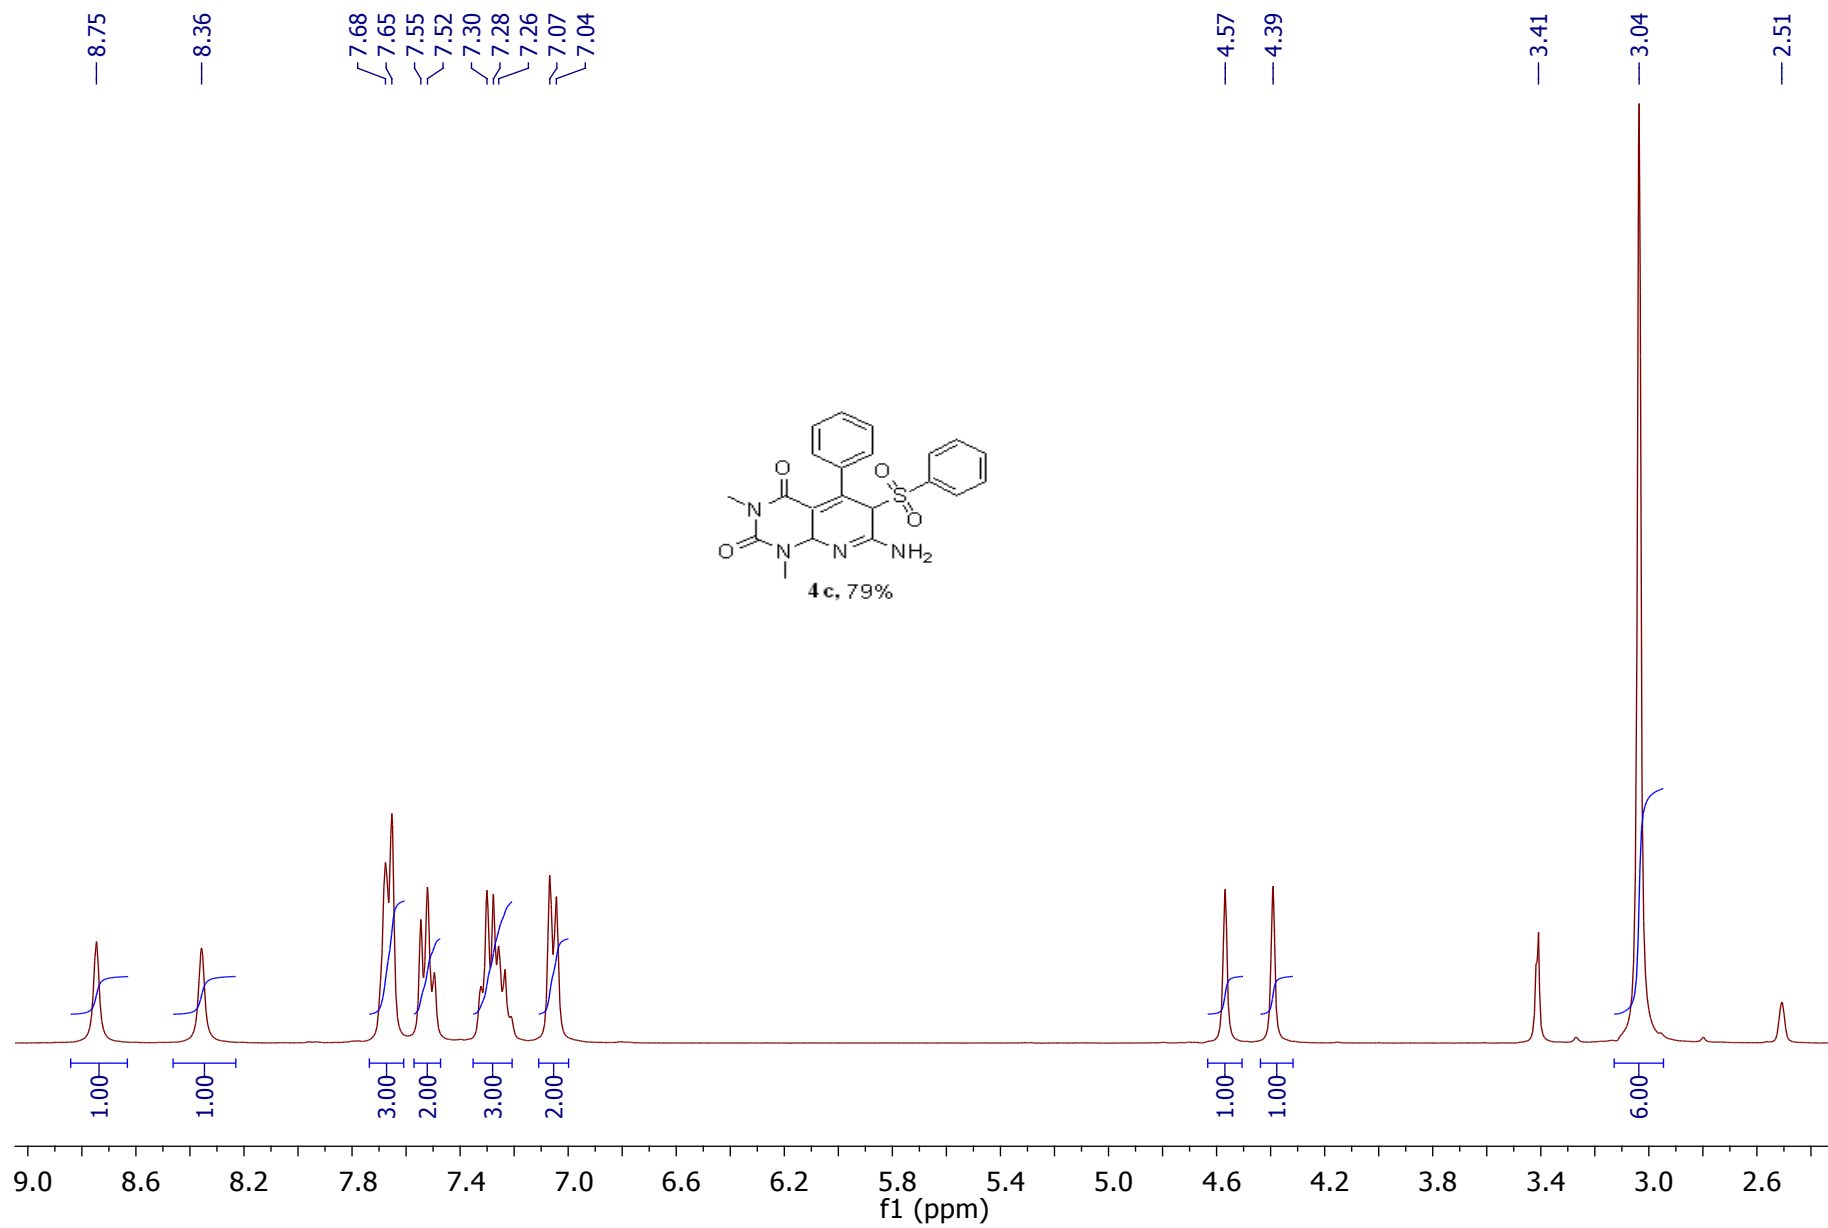

**Fig S-5:**  $^1\text{H}$  NMR Spectrum of Product **4c**

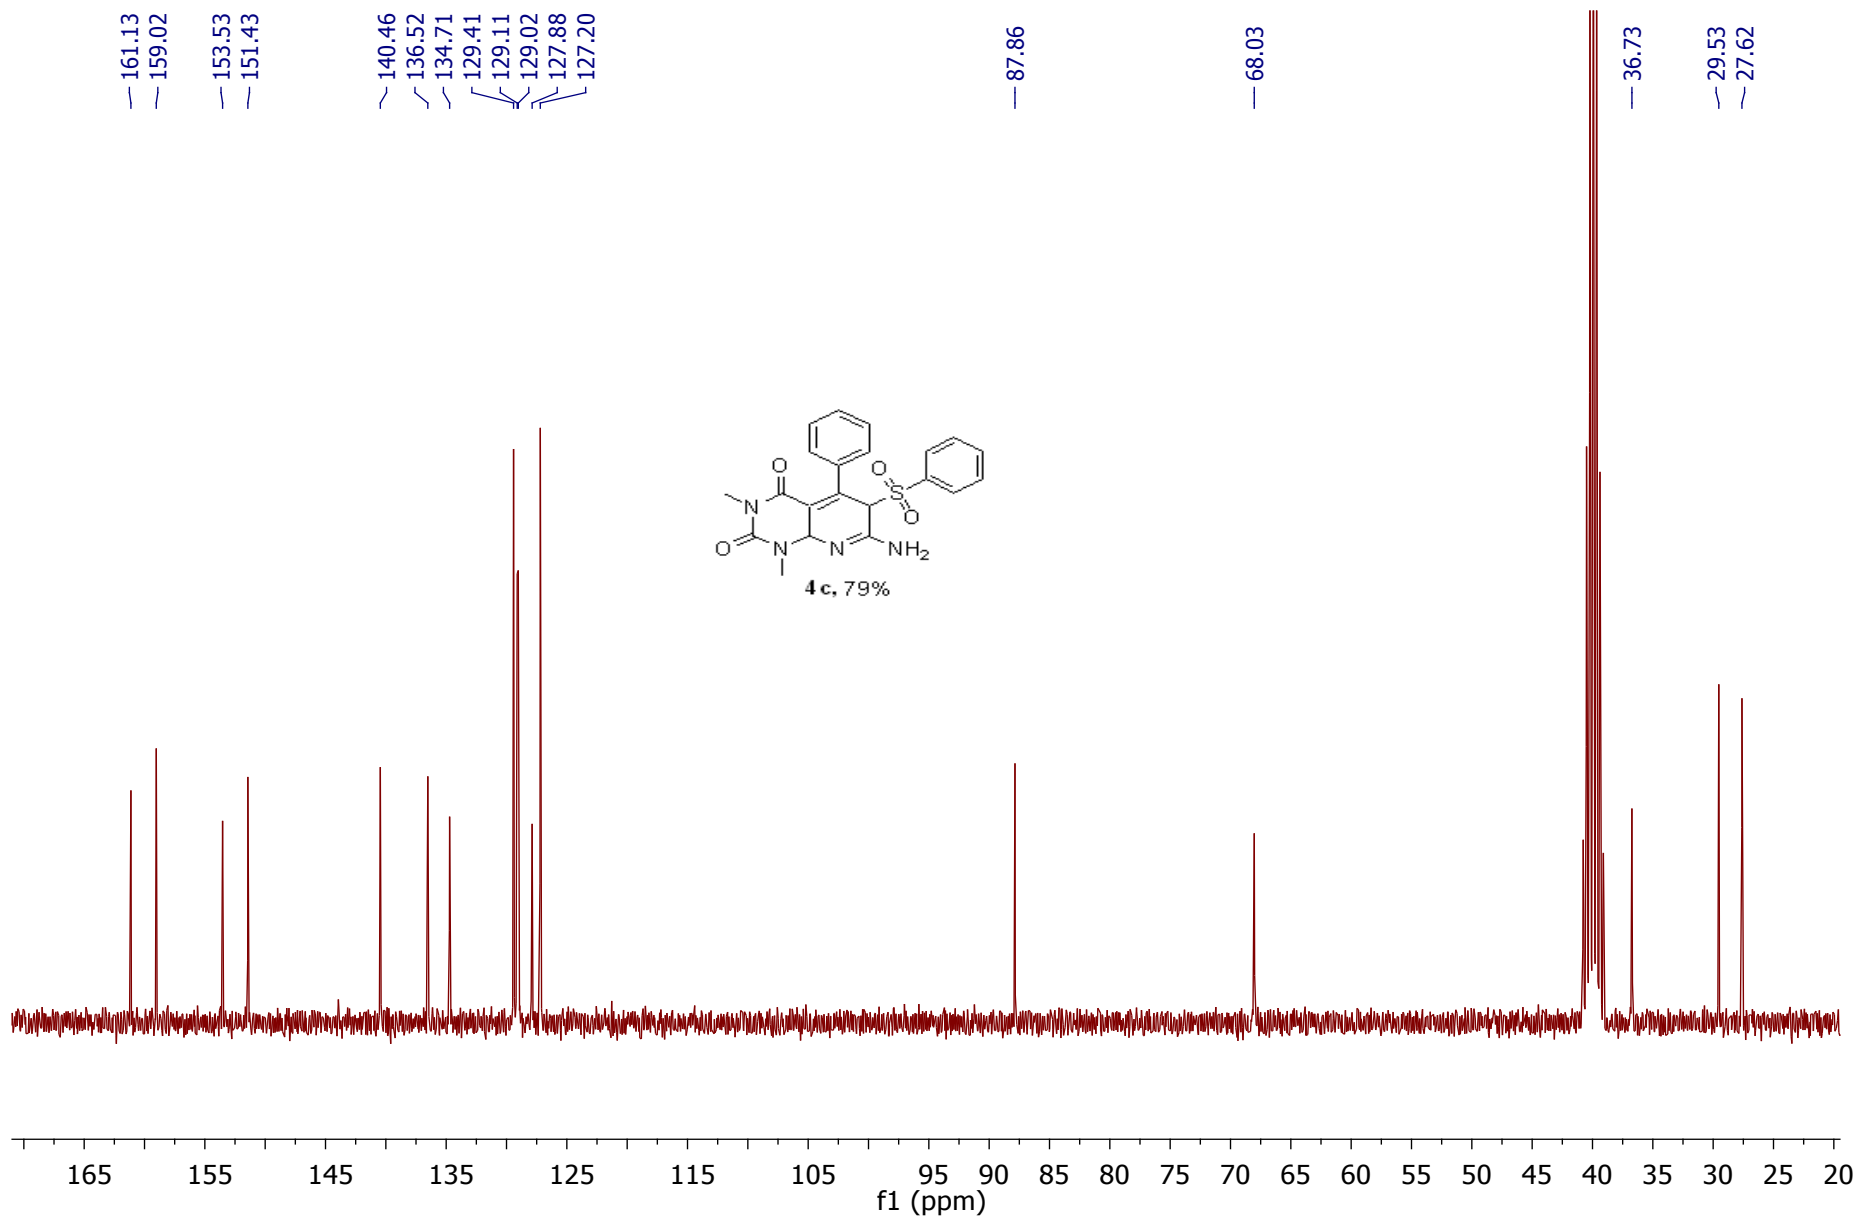

**Fig S-6:** <sup>13</sup>C NMR Spectrum of Product 4c

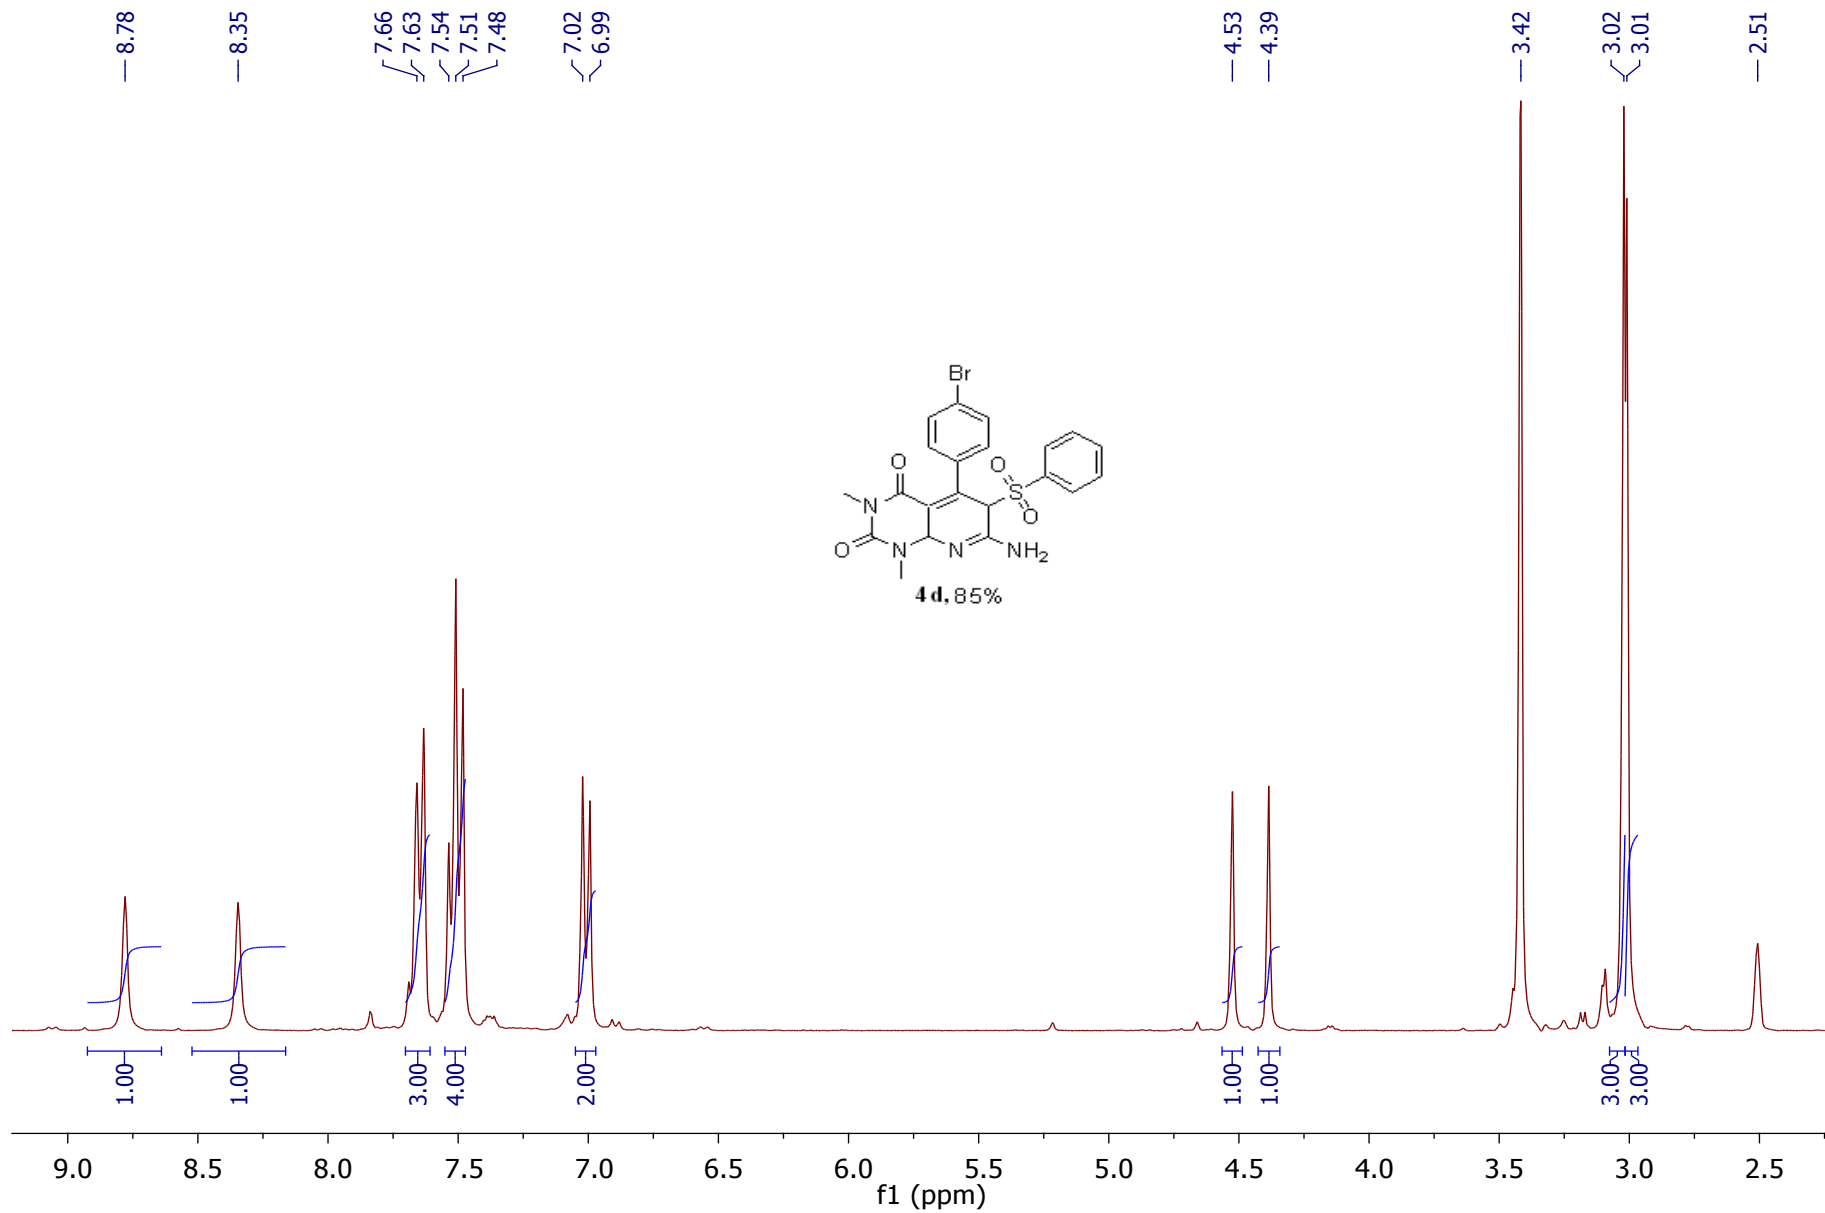

**Fig S-7: <sup>1</sup>H NMR Spectrum of Product **4d****

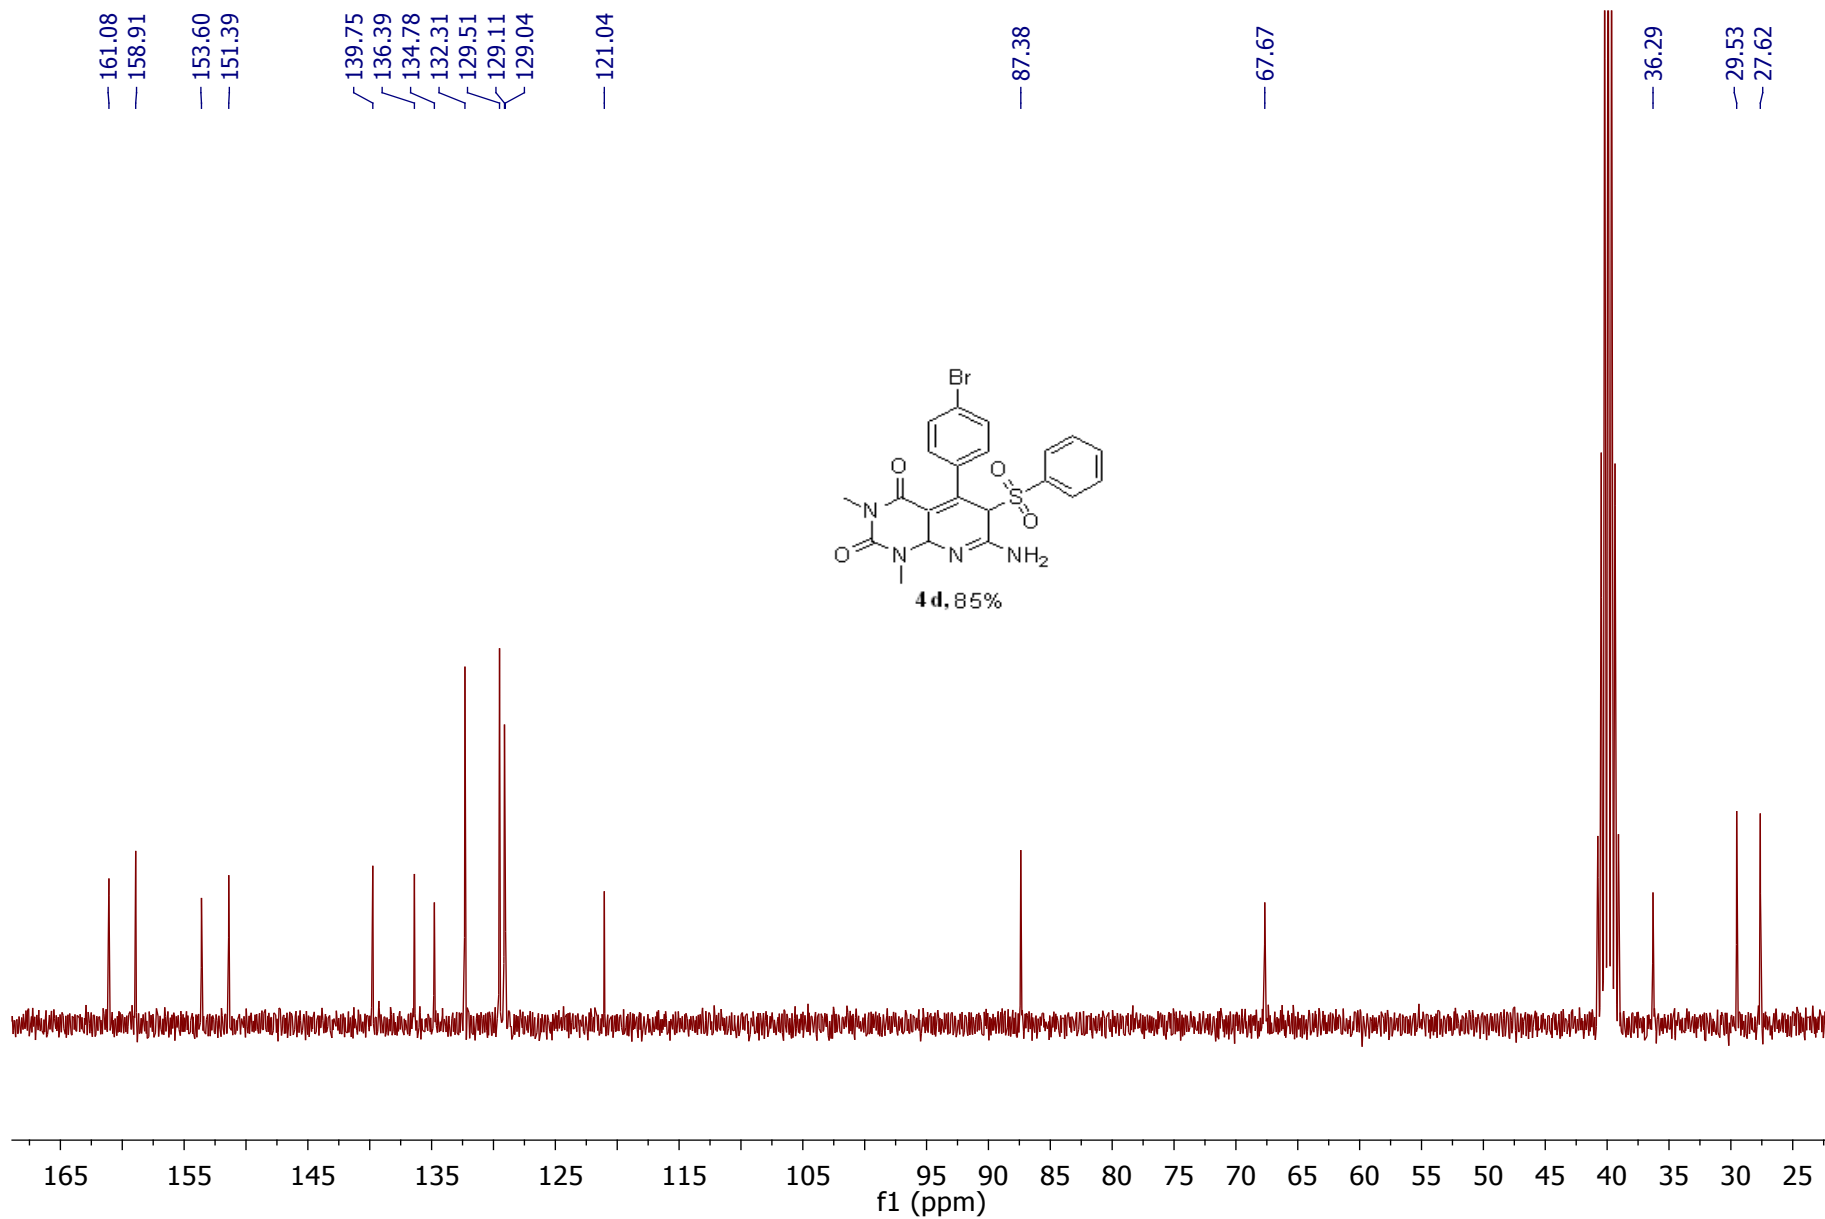

**Fig S-8:** <sup>13</sup>C NMR Spectrum of Product 4d

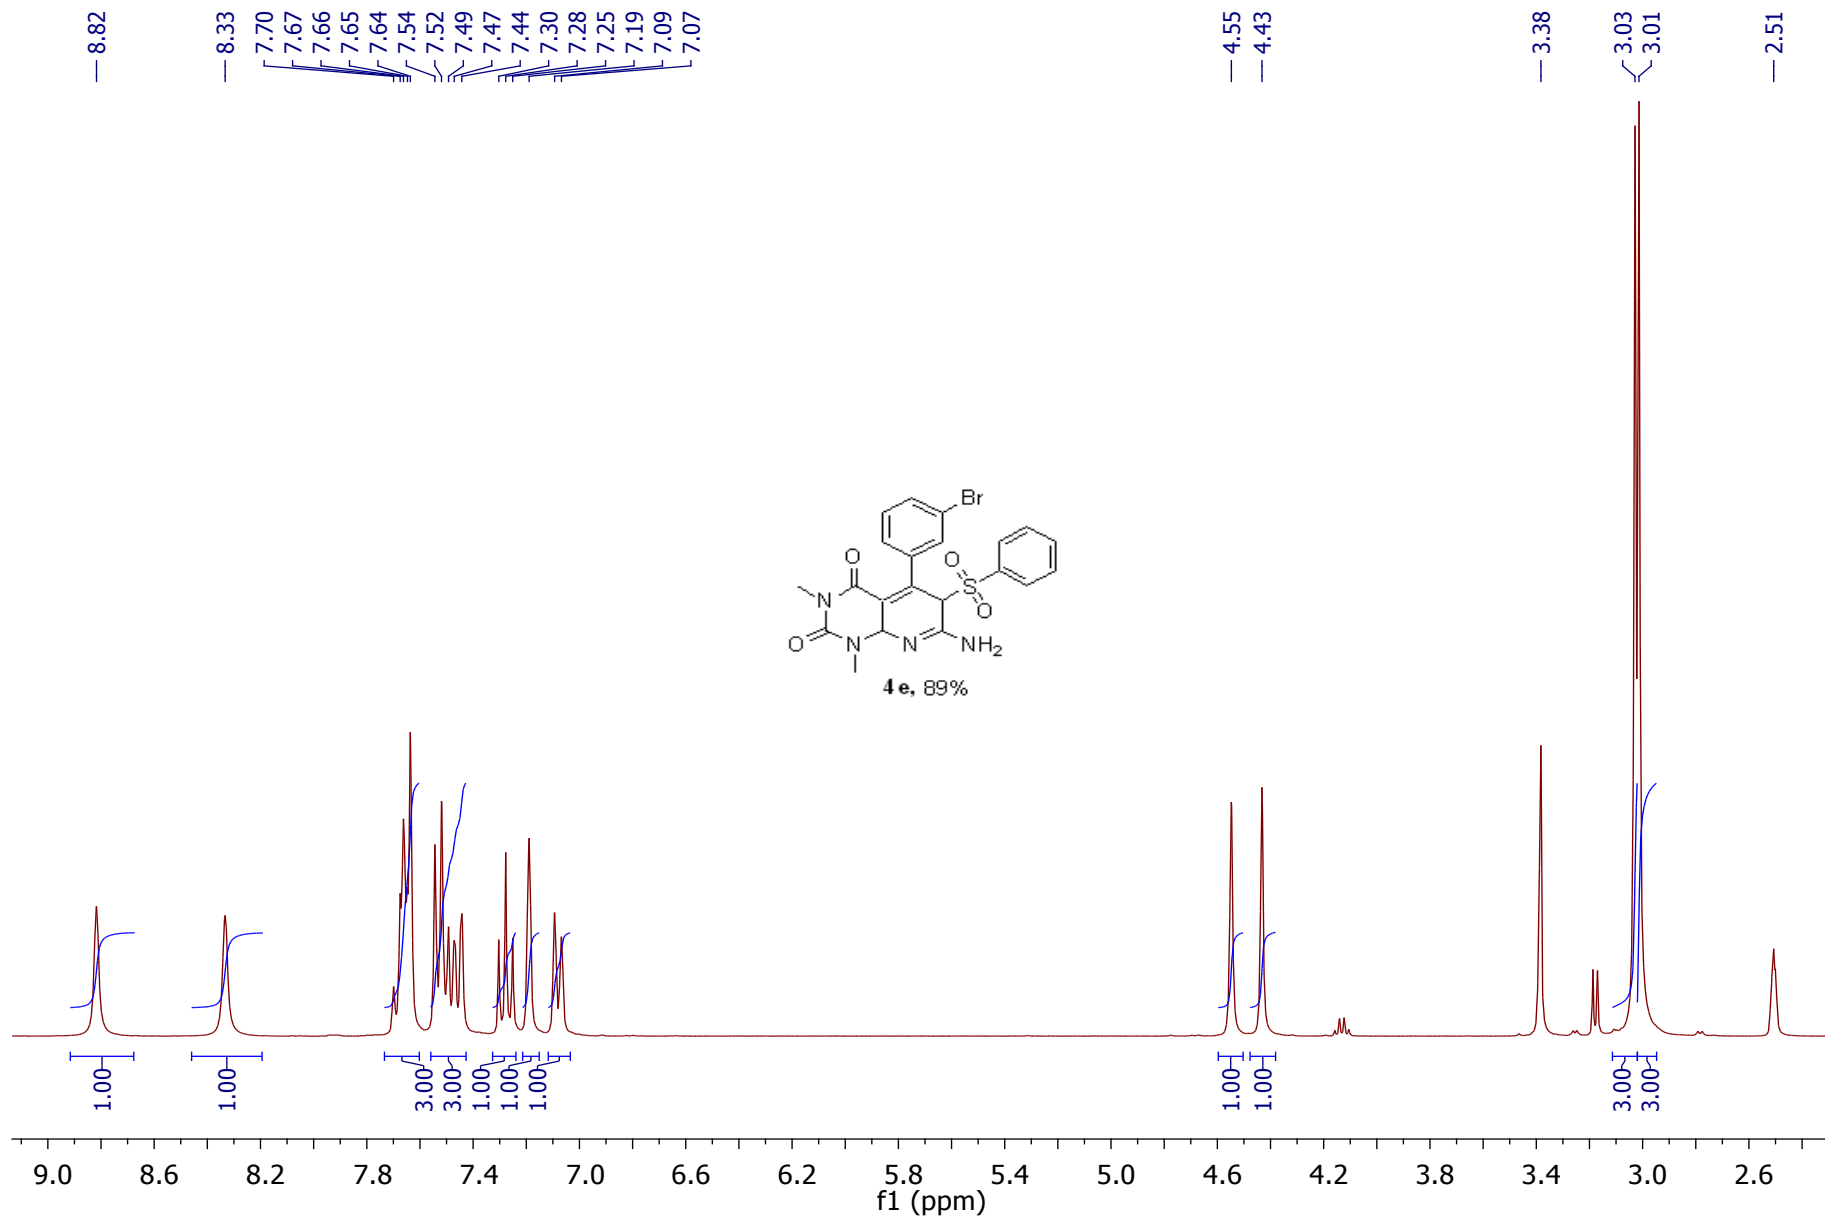

**Fig S-9: <sup>1</sup>H NMR Spectrum of Product 4e**

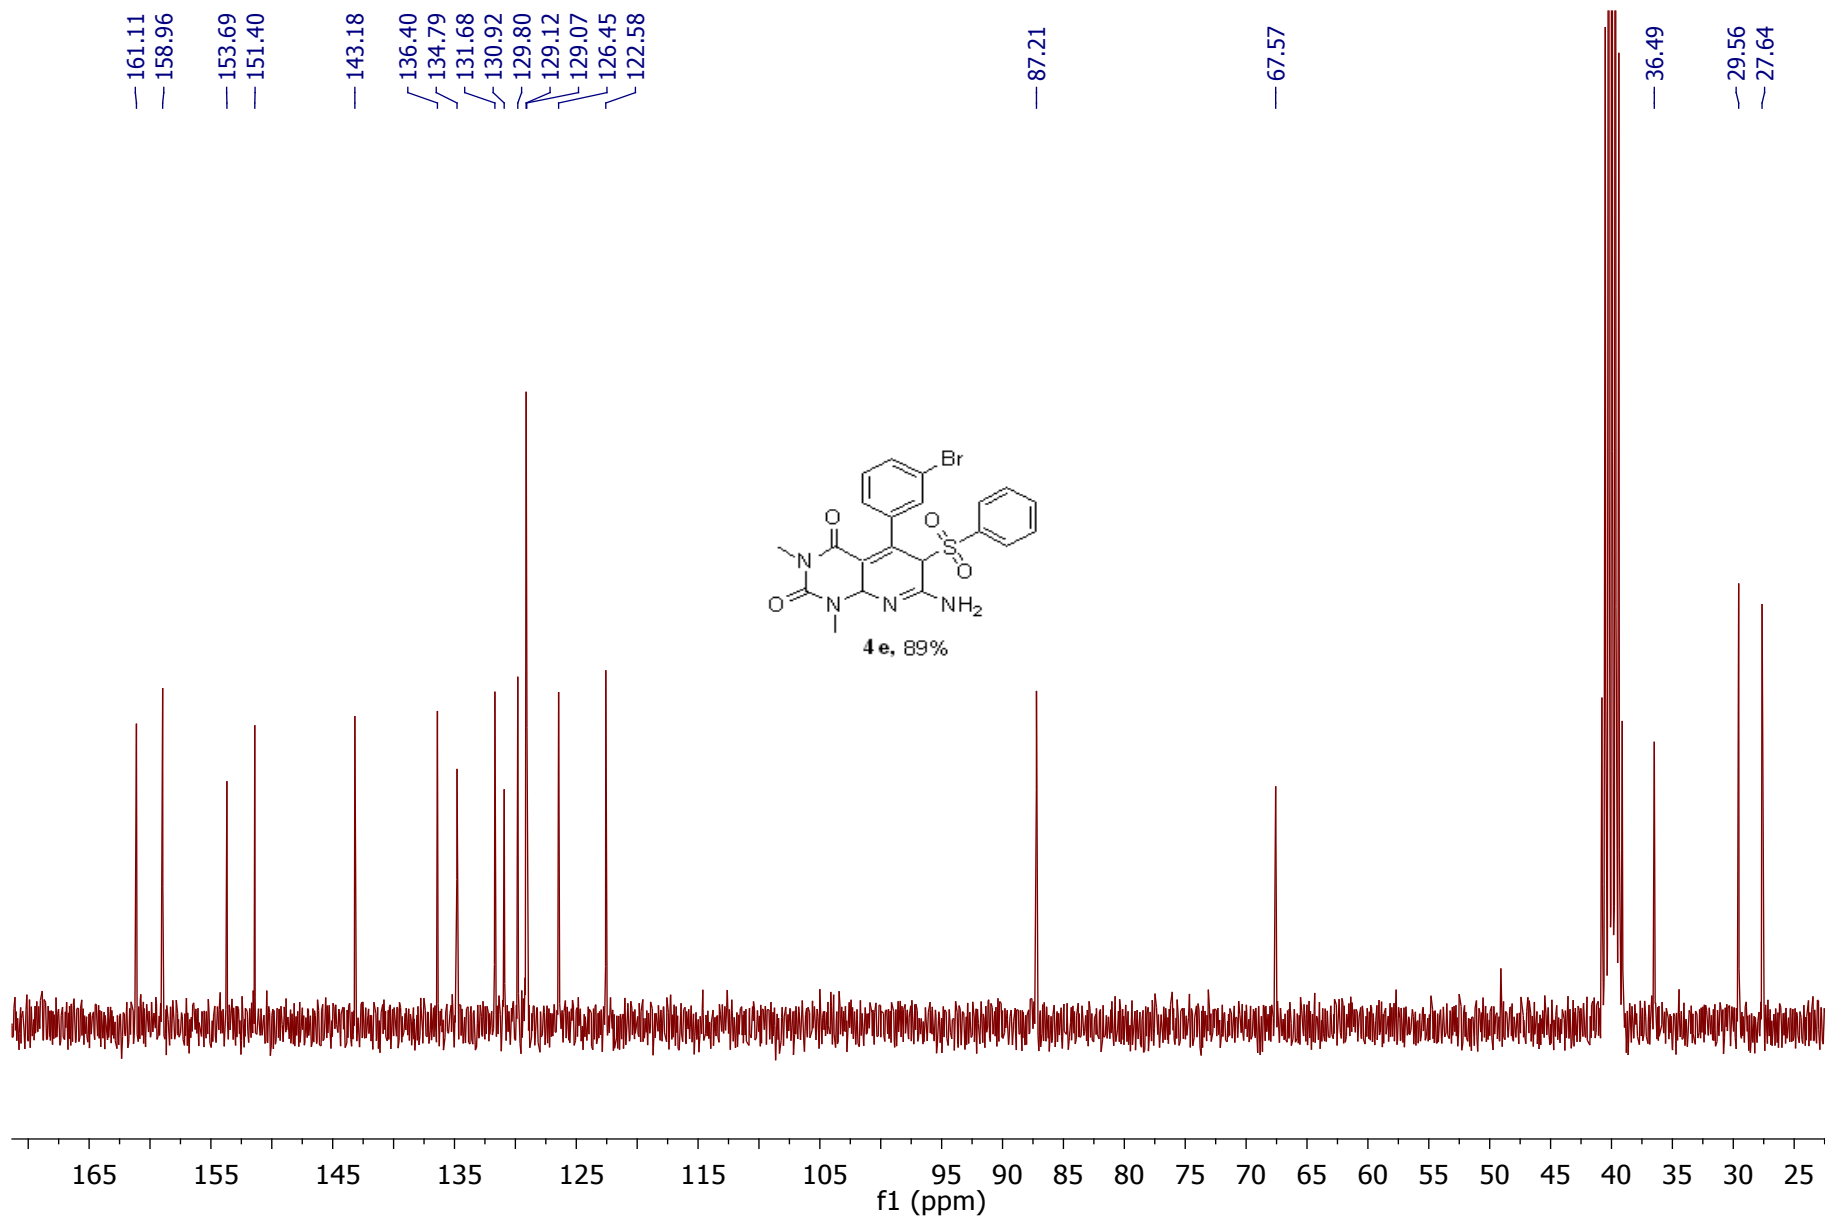

**Fig S-10: <sup>13</sup>C NMR Spectrum of Product 4e**

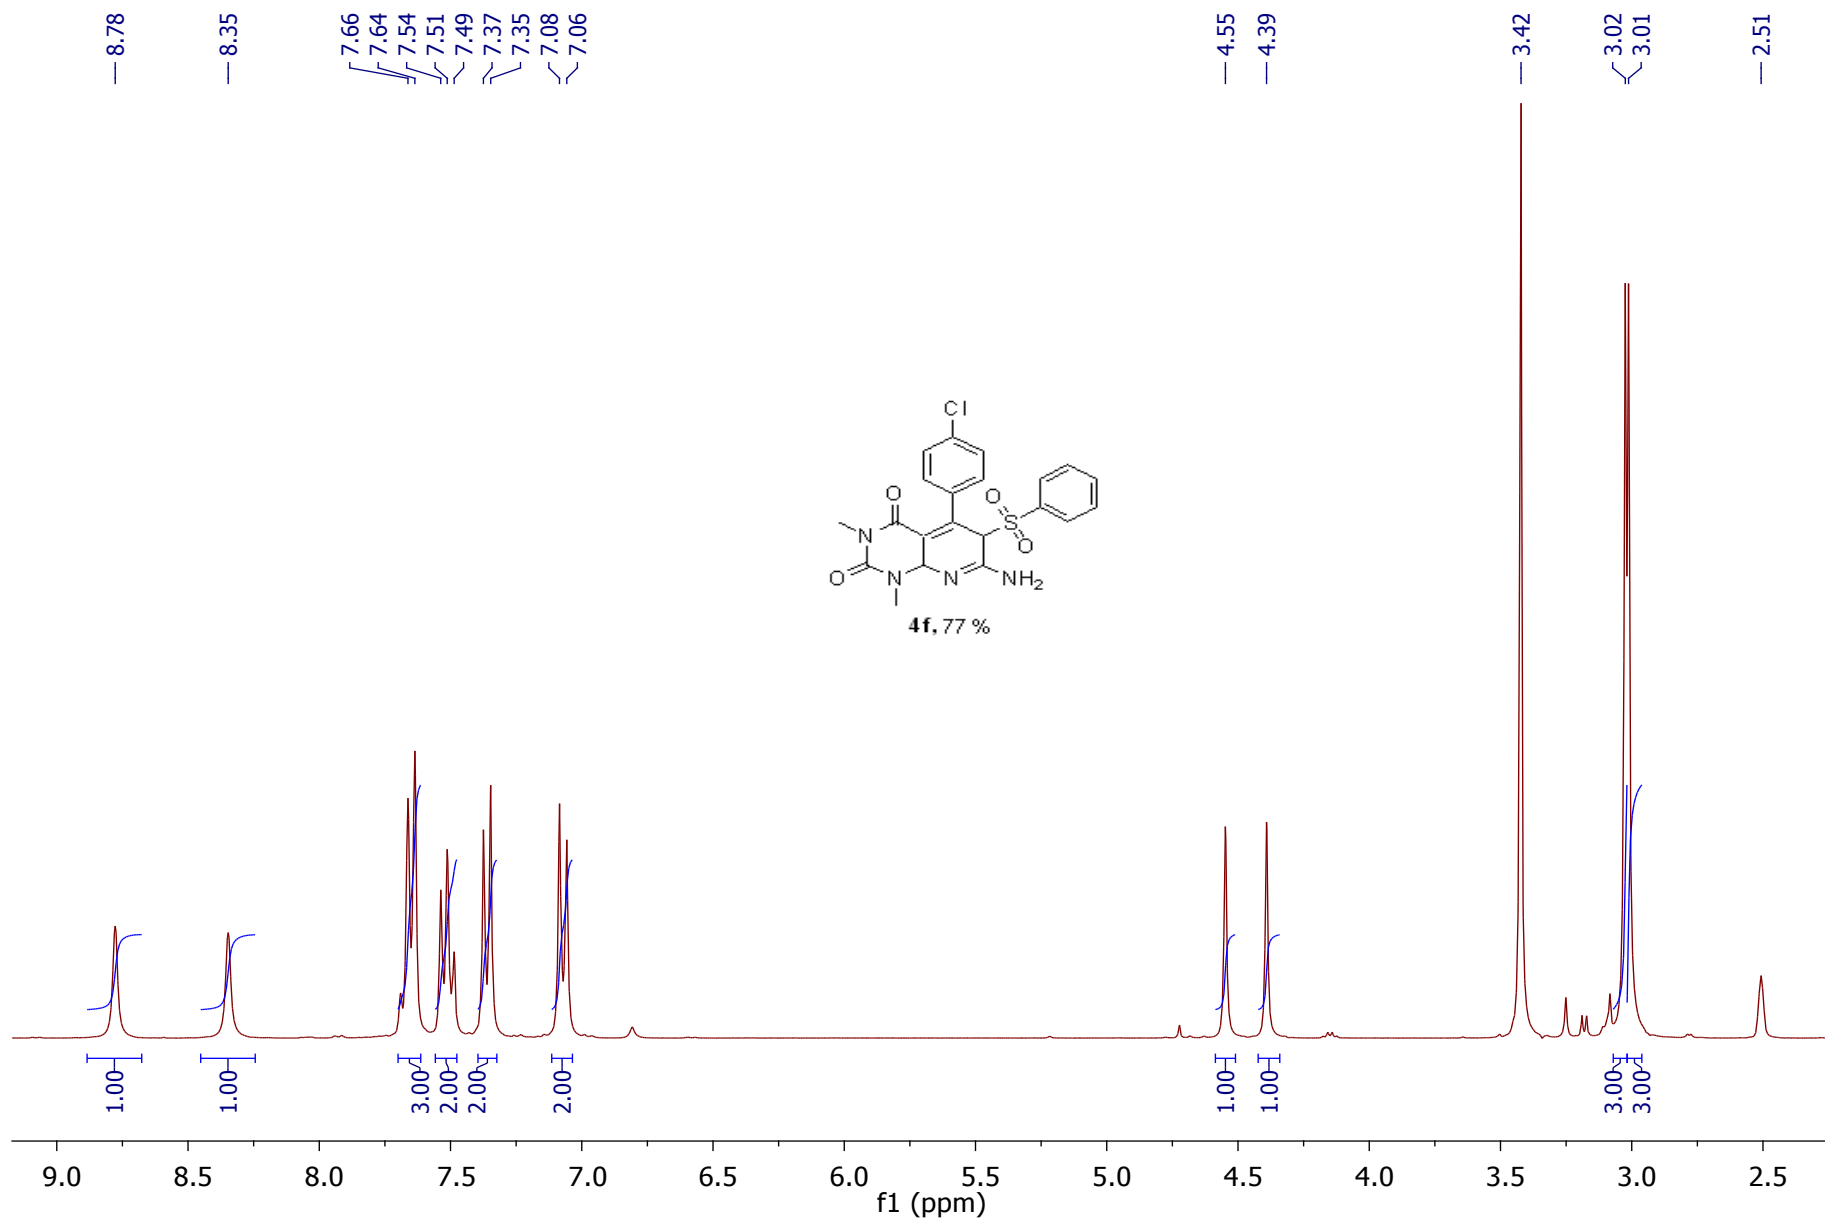

**Fig S-11: <sup>1</sup>H NMR Spectrum of Product 4f**



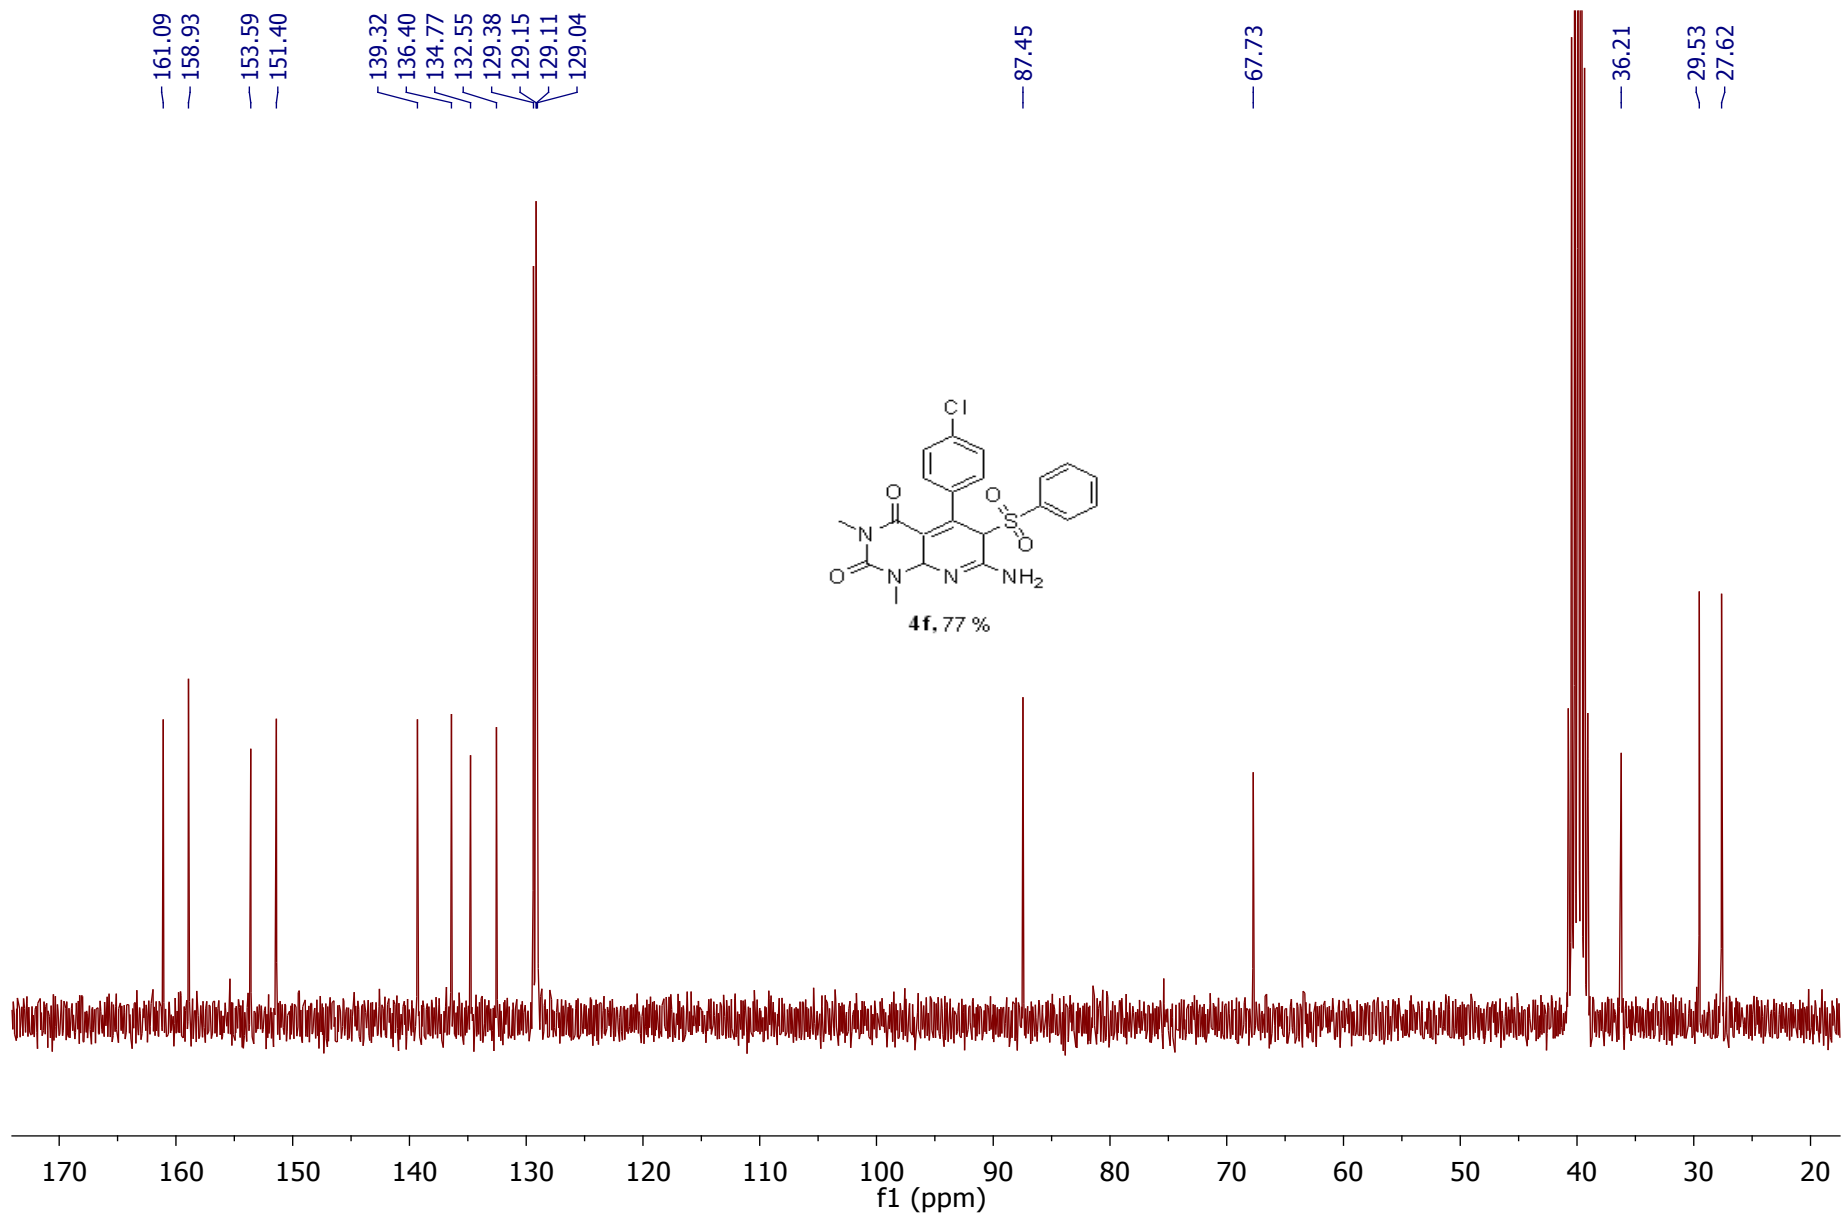

Fig S-12: <sup>13</sup>C NMR Spectrum of Product 4f

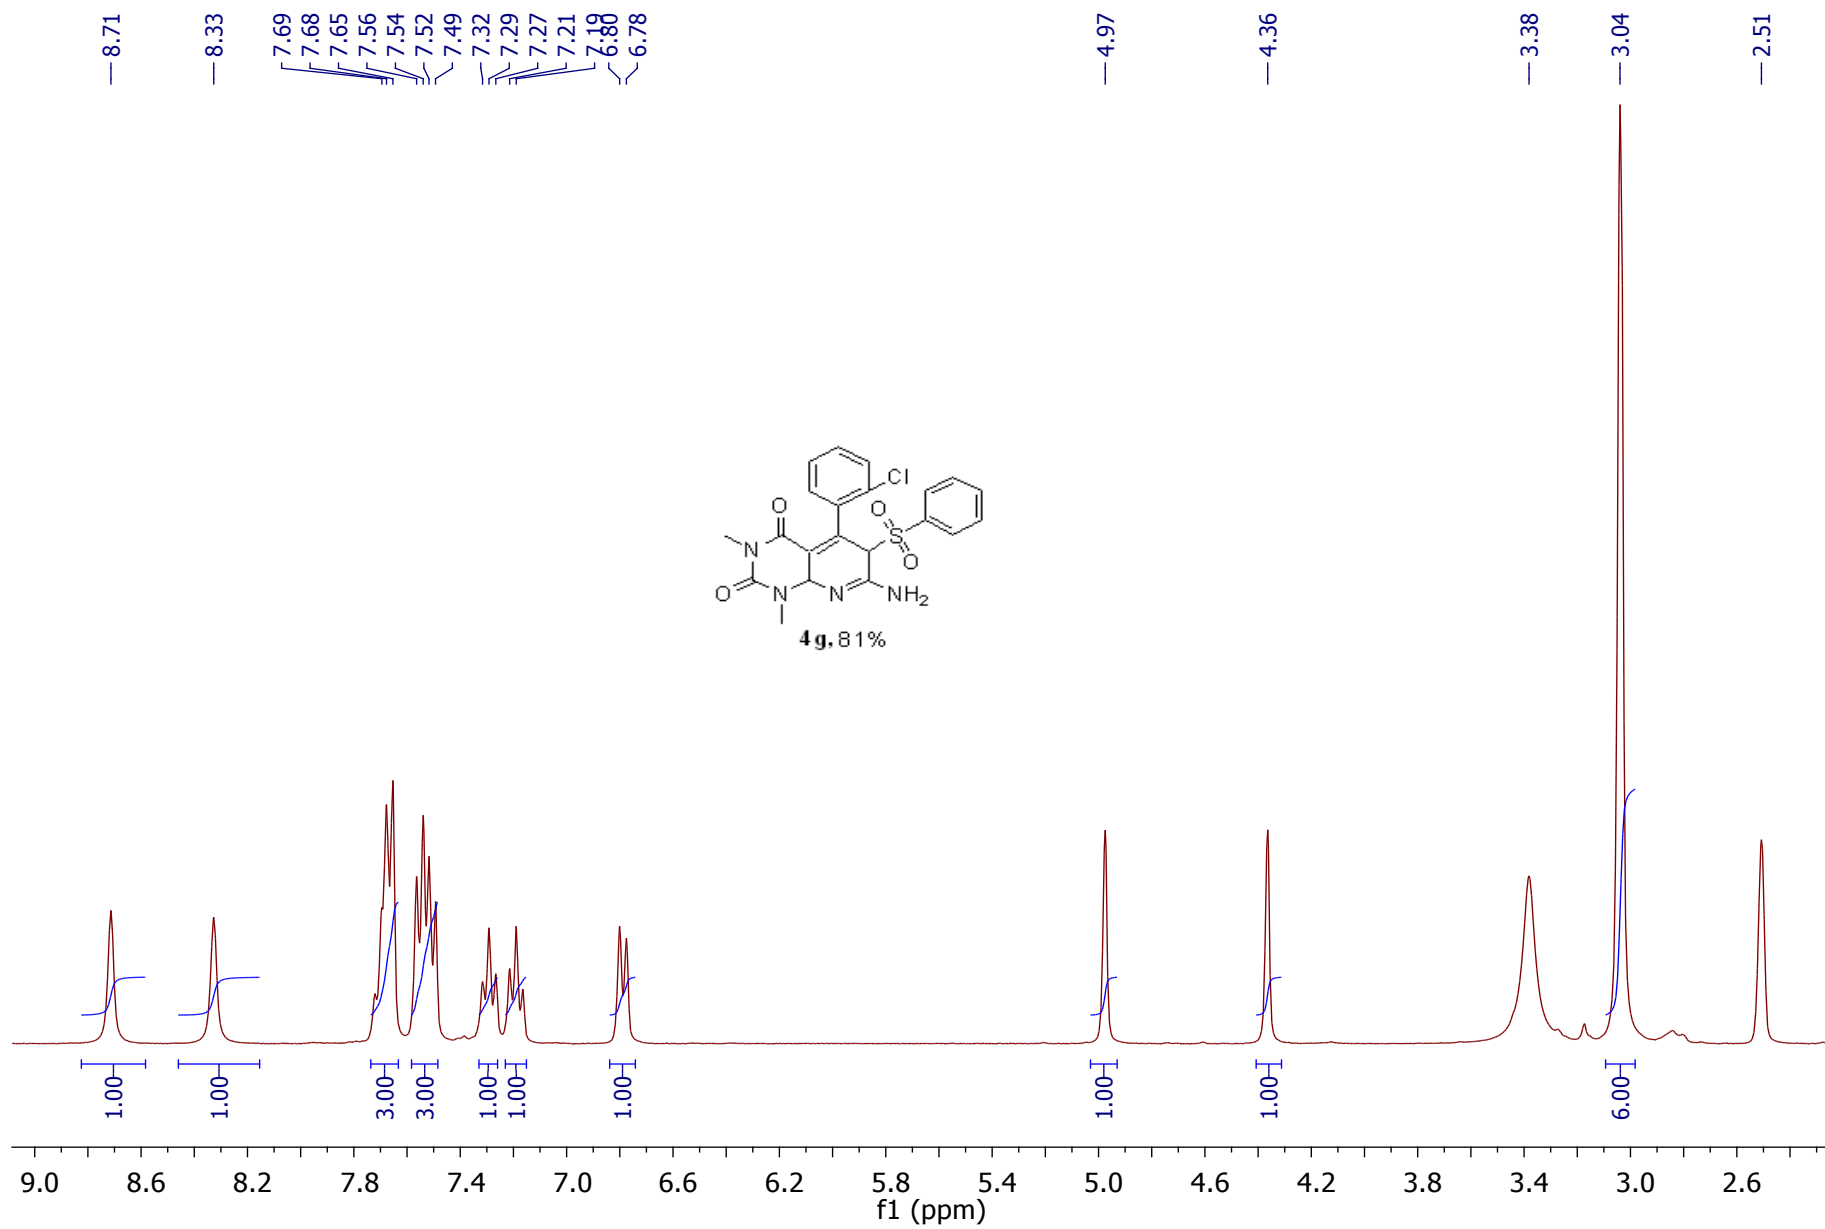

**Fig S-13:** <sup>1</sup>H NMR Spectrum of Product **4g**

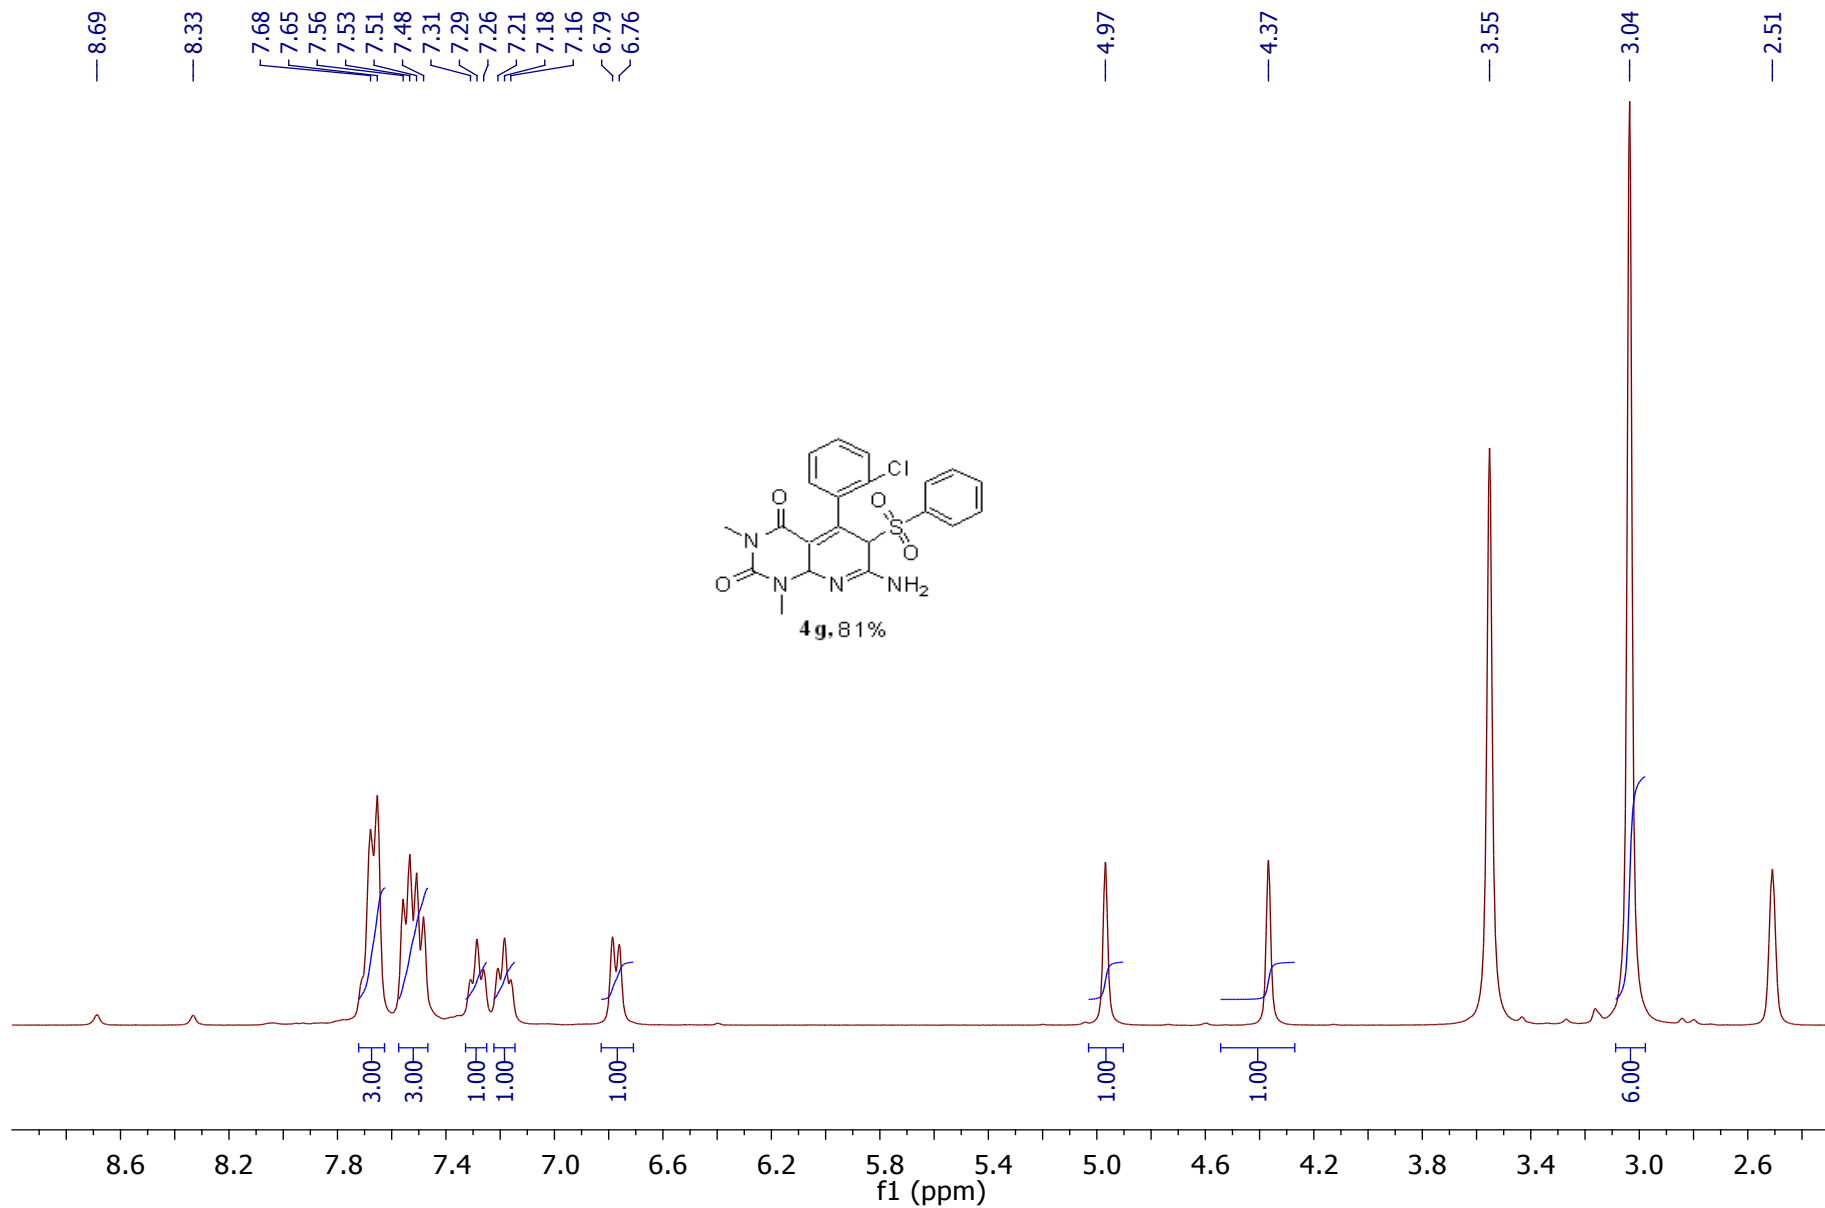

**Fig S-14:**  $^1\text{H}$  NMR (Deuterium exchange) Spectrum of Product **4g**

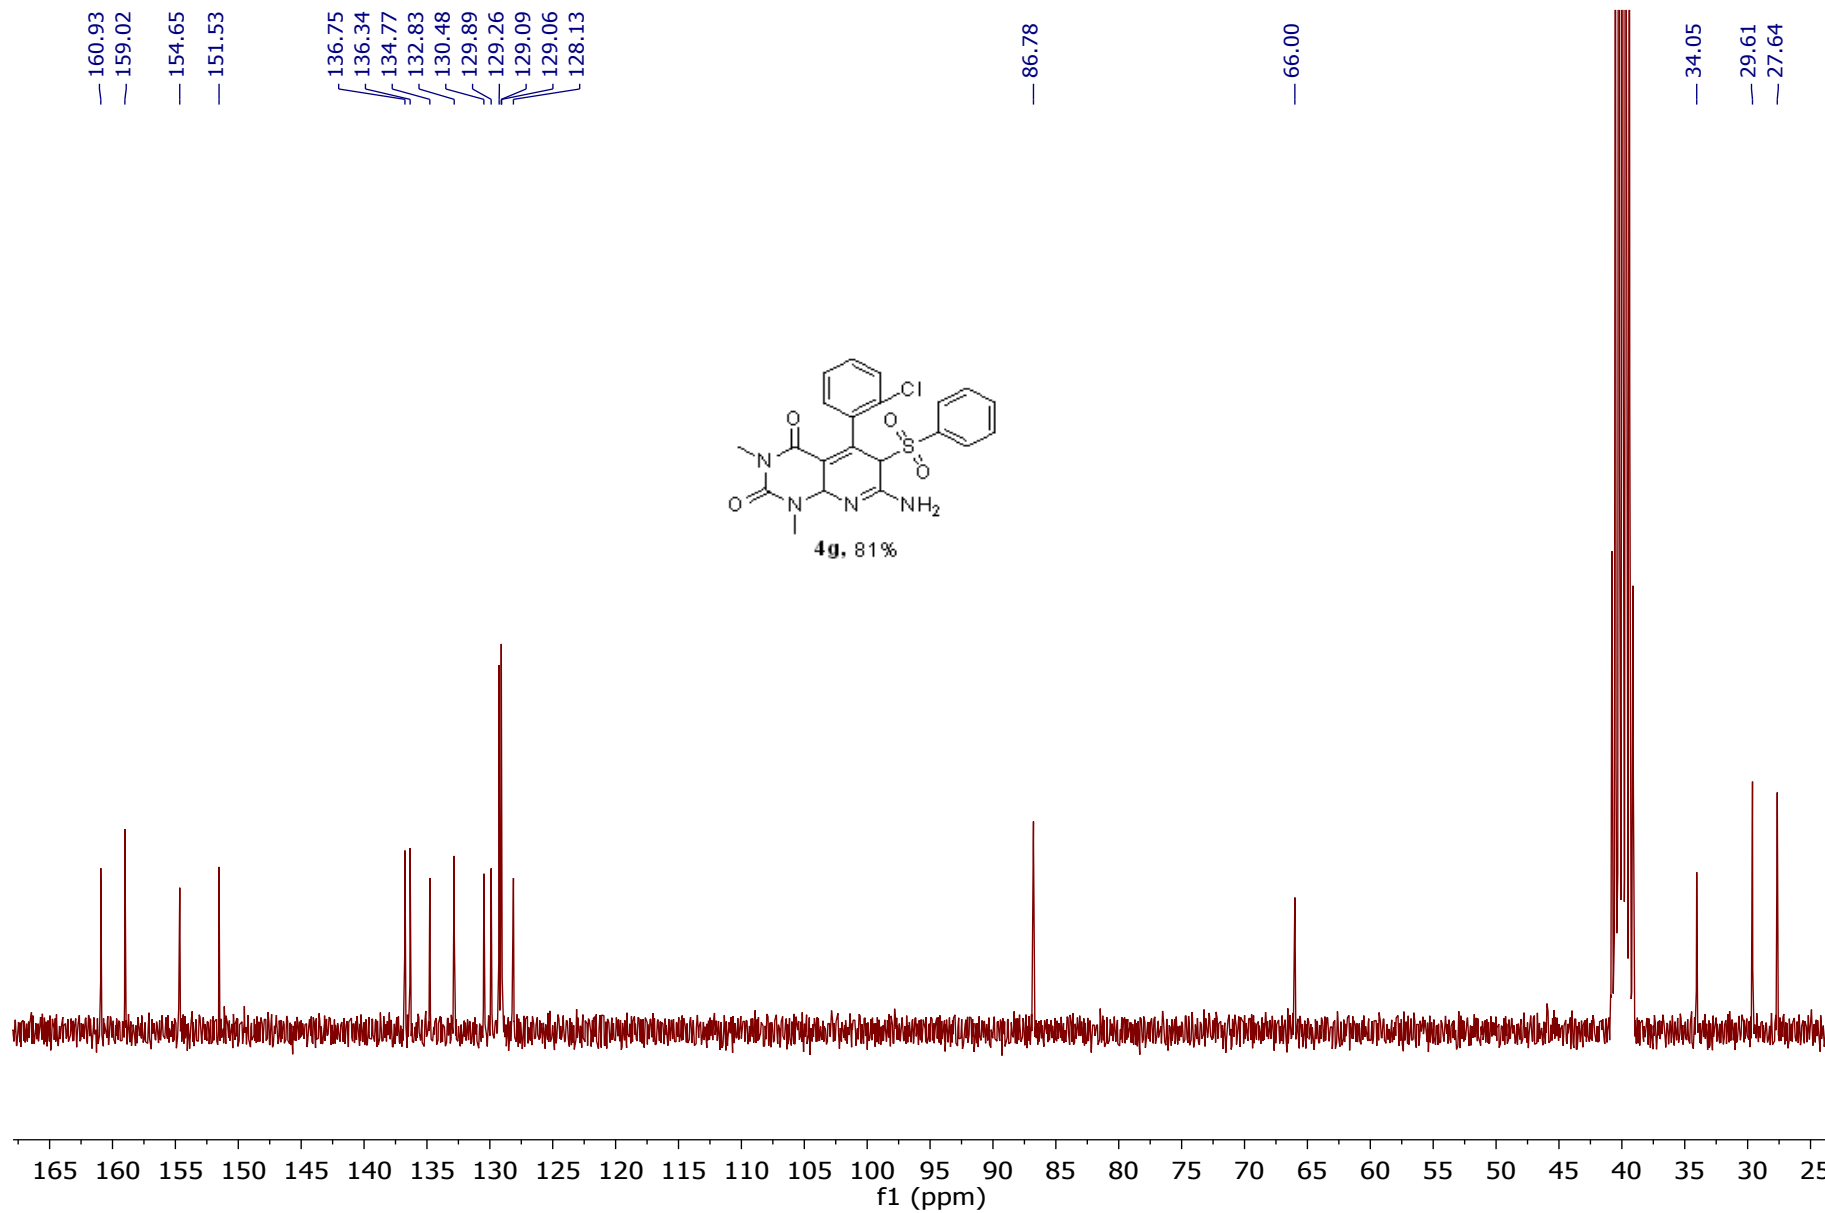

Fig S-15: <sup>13</sup>C NMR Spectrum of Product 4g

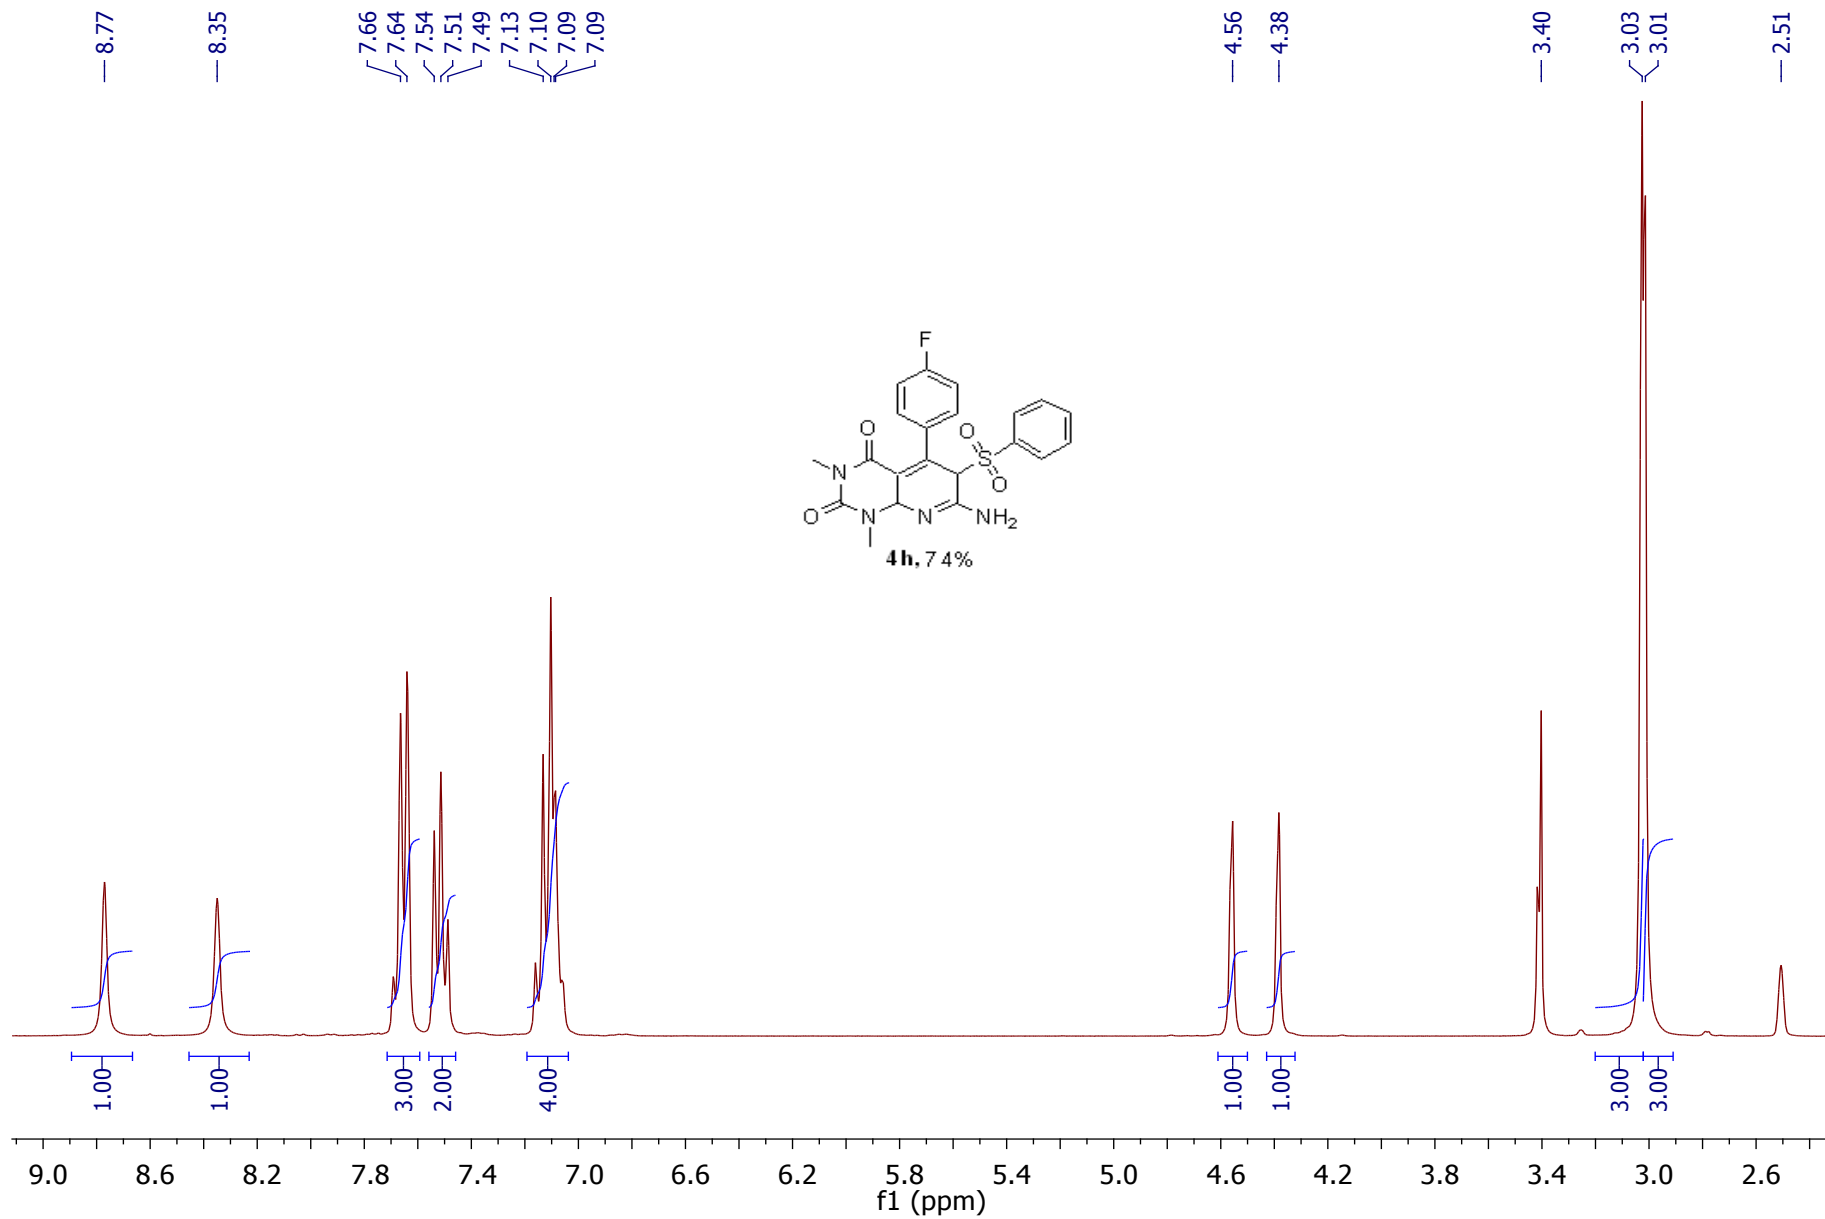

**Fig S-16:** <sup>1</sup>H NMR Spectrum of Product **4h**

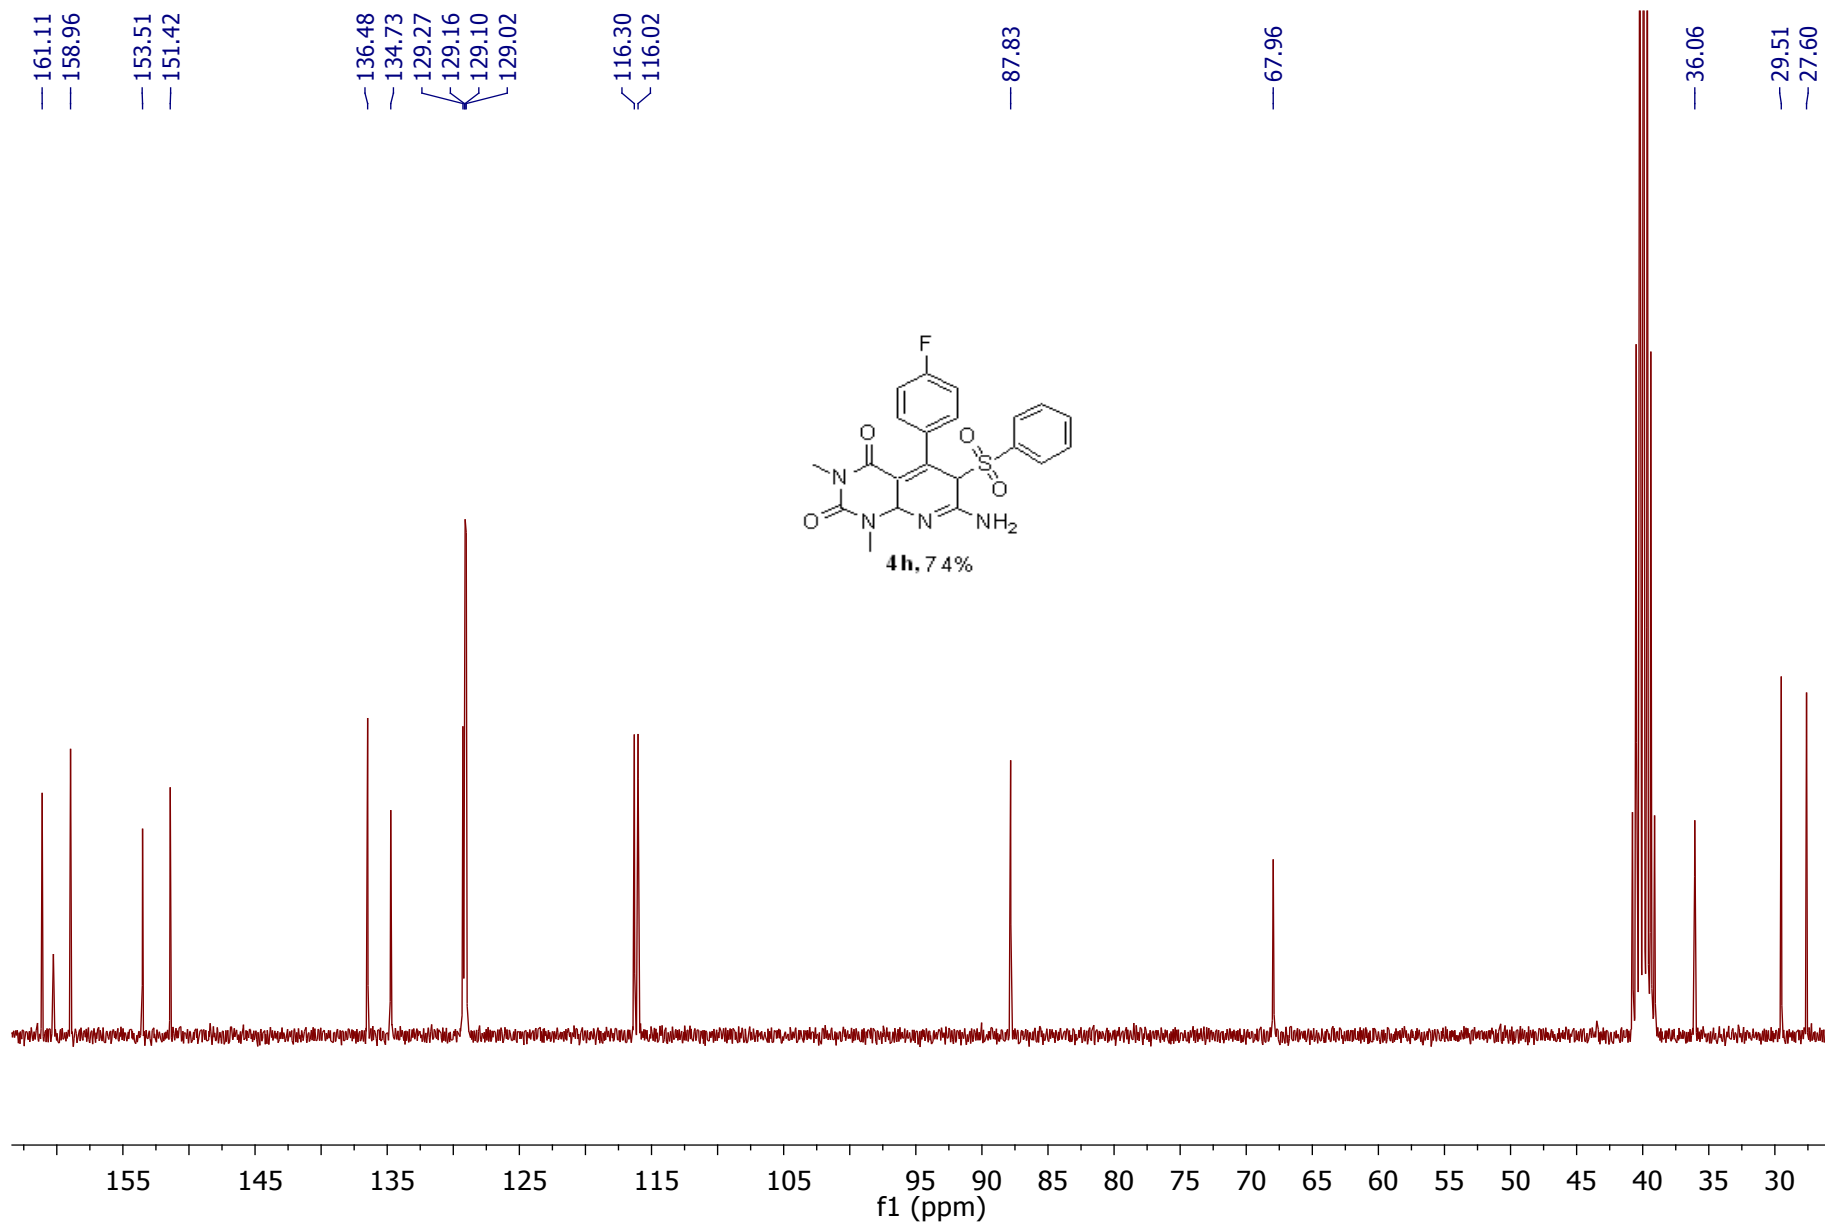

Fig S-17: <sup>13</sup>C NMR Spectrum of Product **4h**

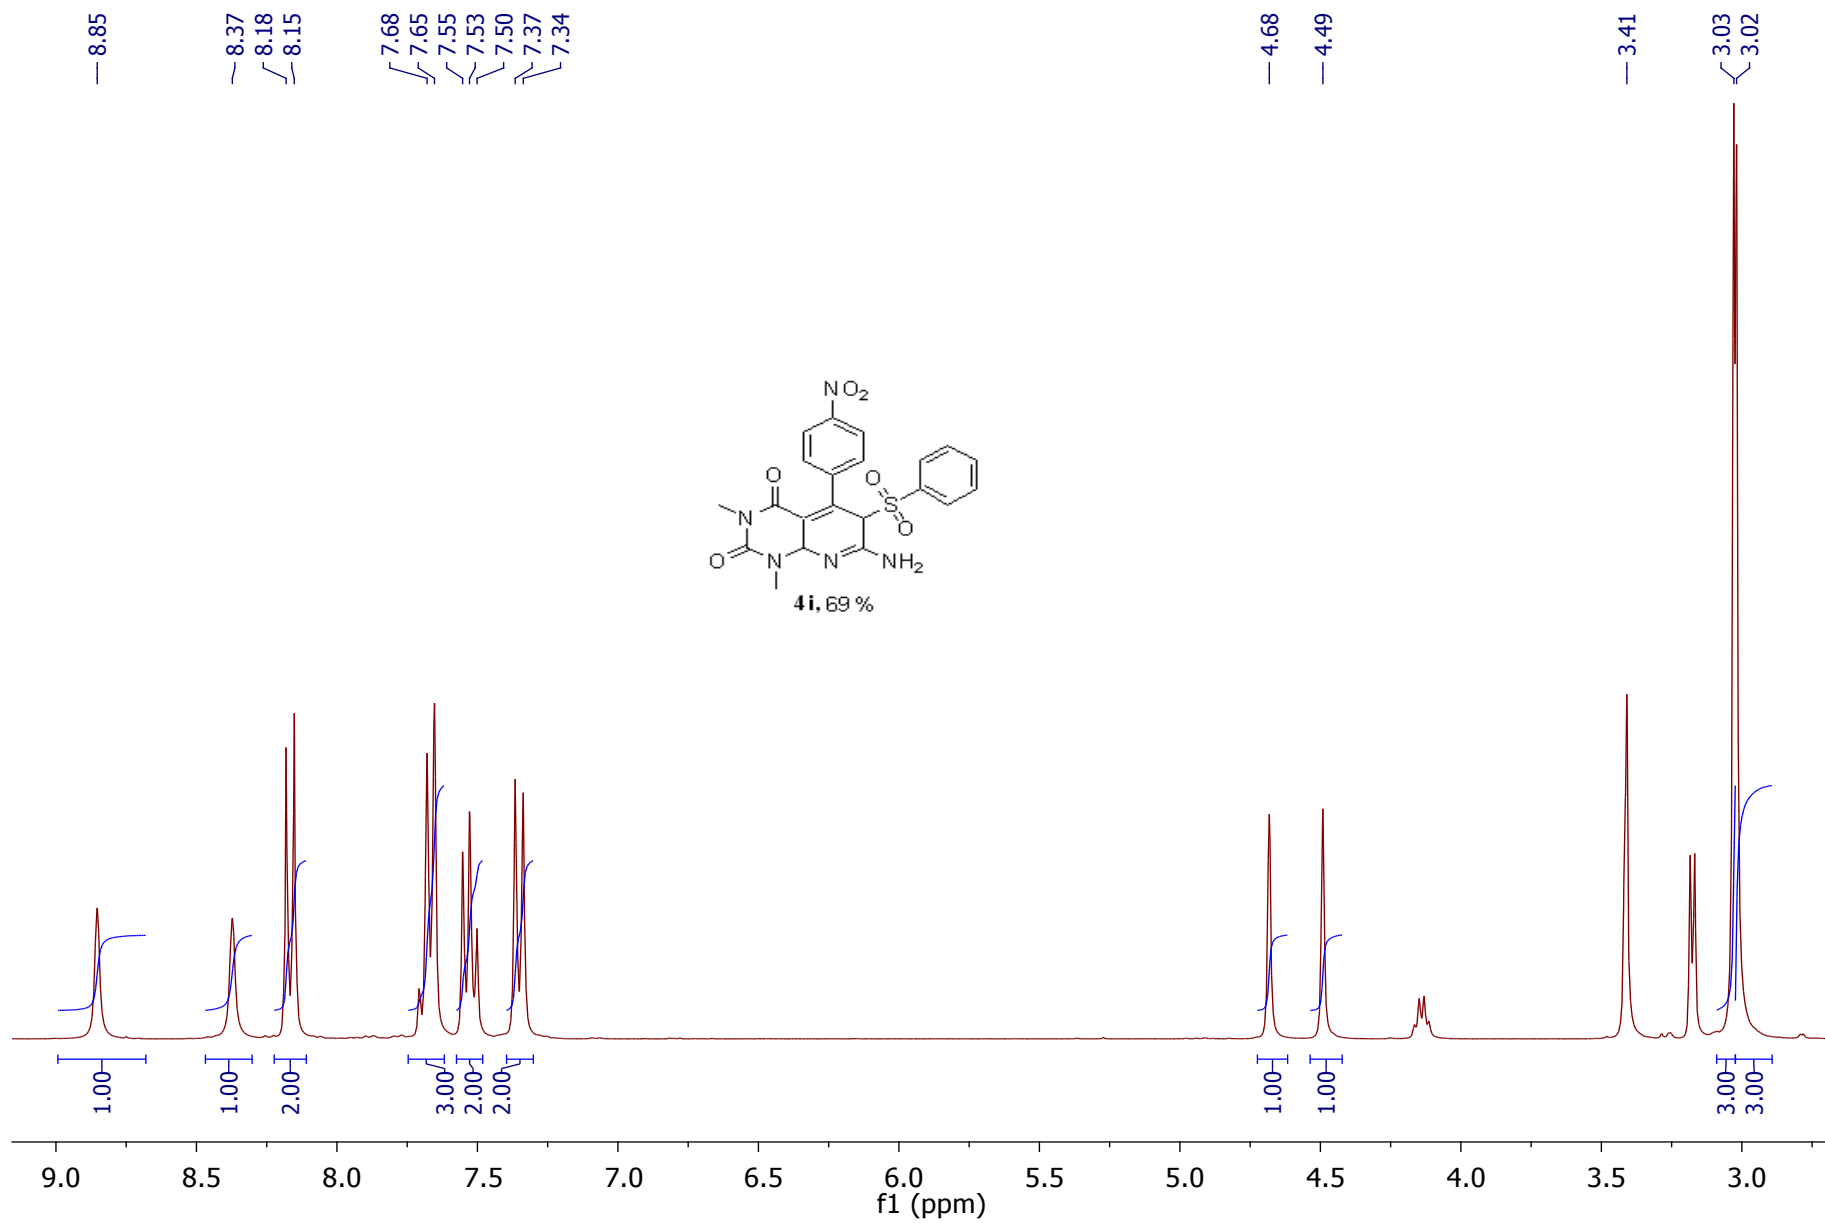

**Fig S-18: <sup>1</sup>H NMR Spectrum of Product **4i****

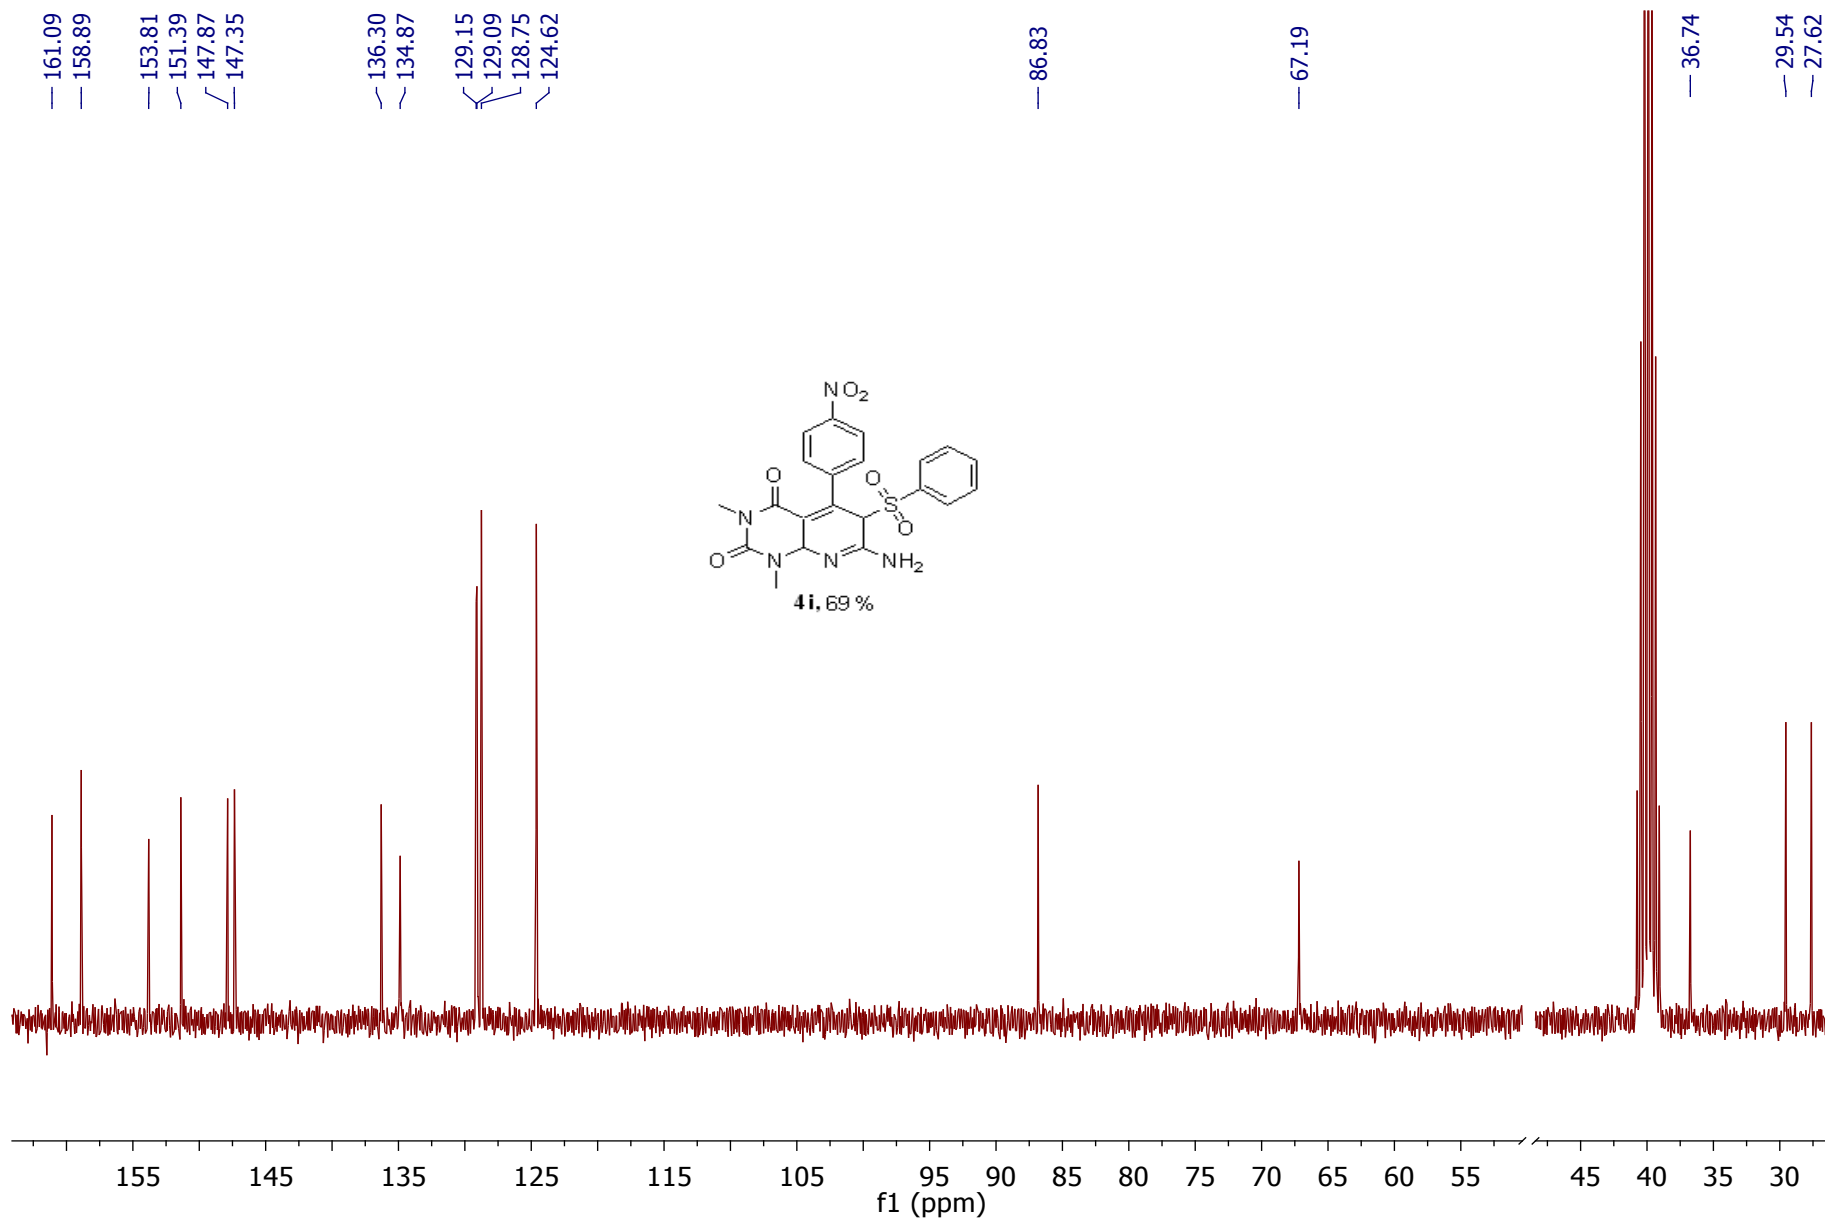

Fig S-19: <sup>13</sup>C NMR Spectrum of Product 4i



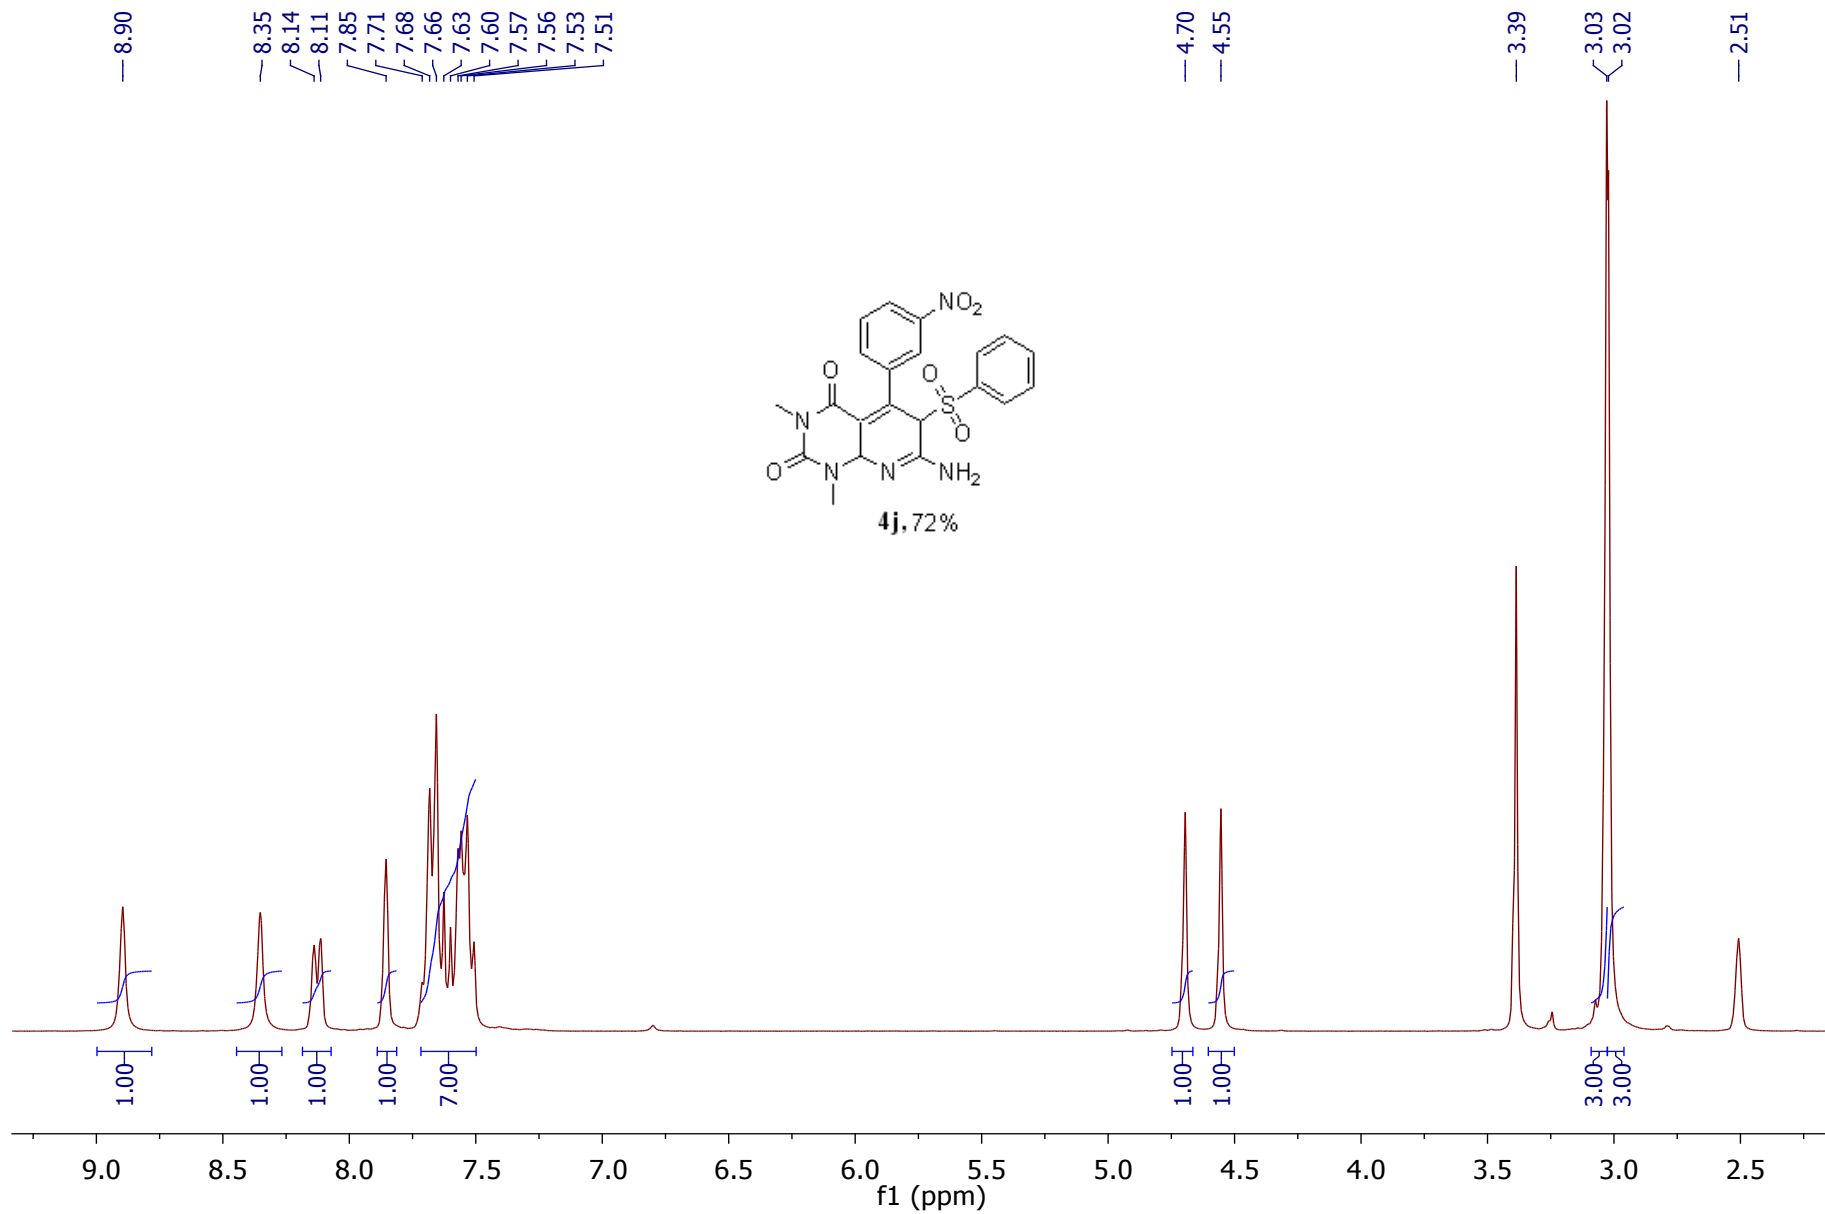

**Fig S-20: <sup>1</sup>H NMR Spectrum of Product **4j****

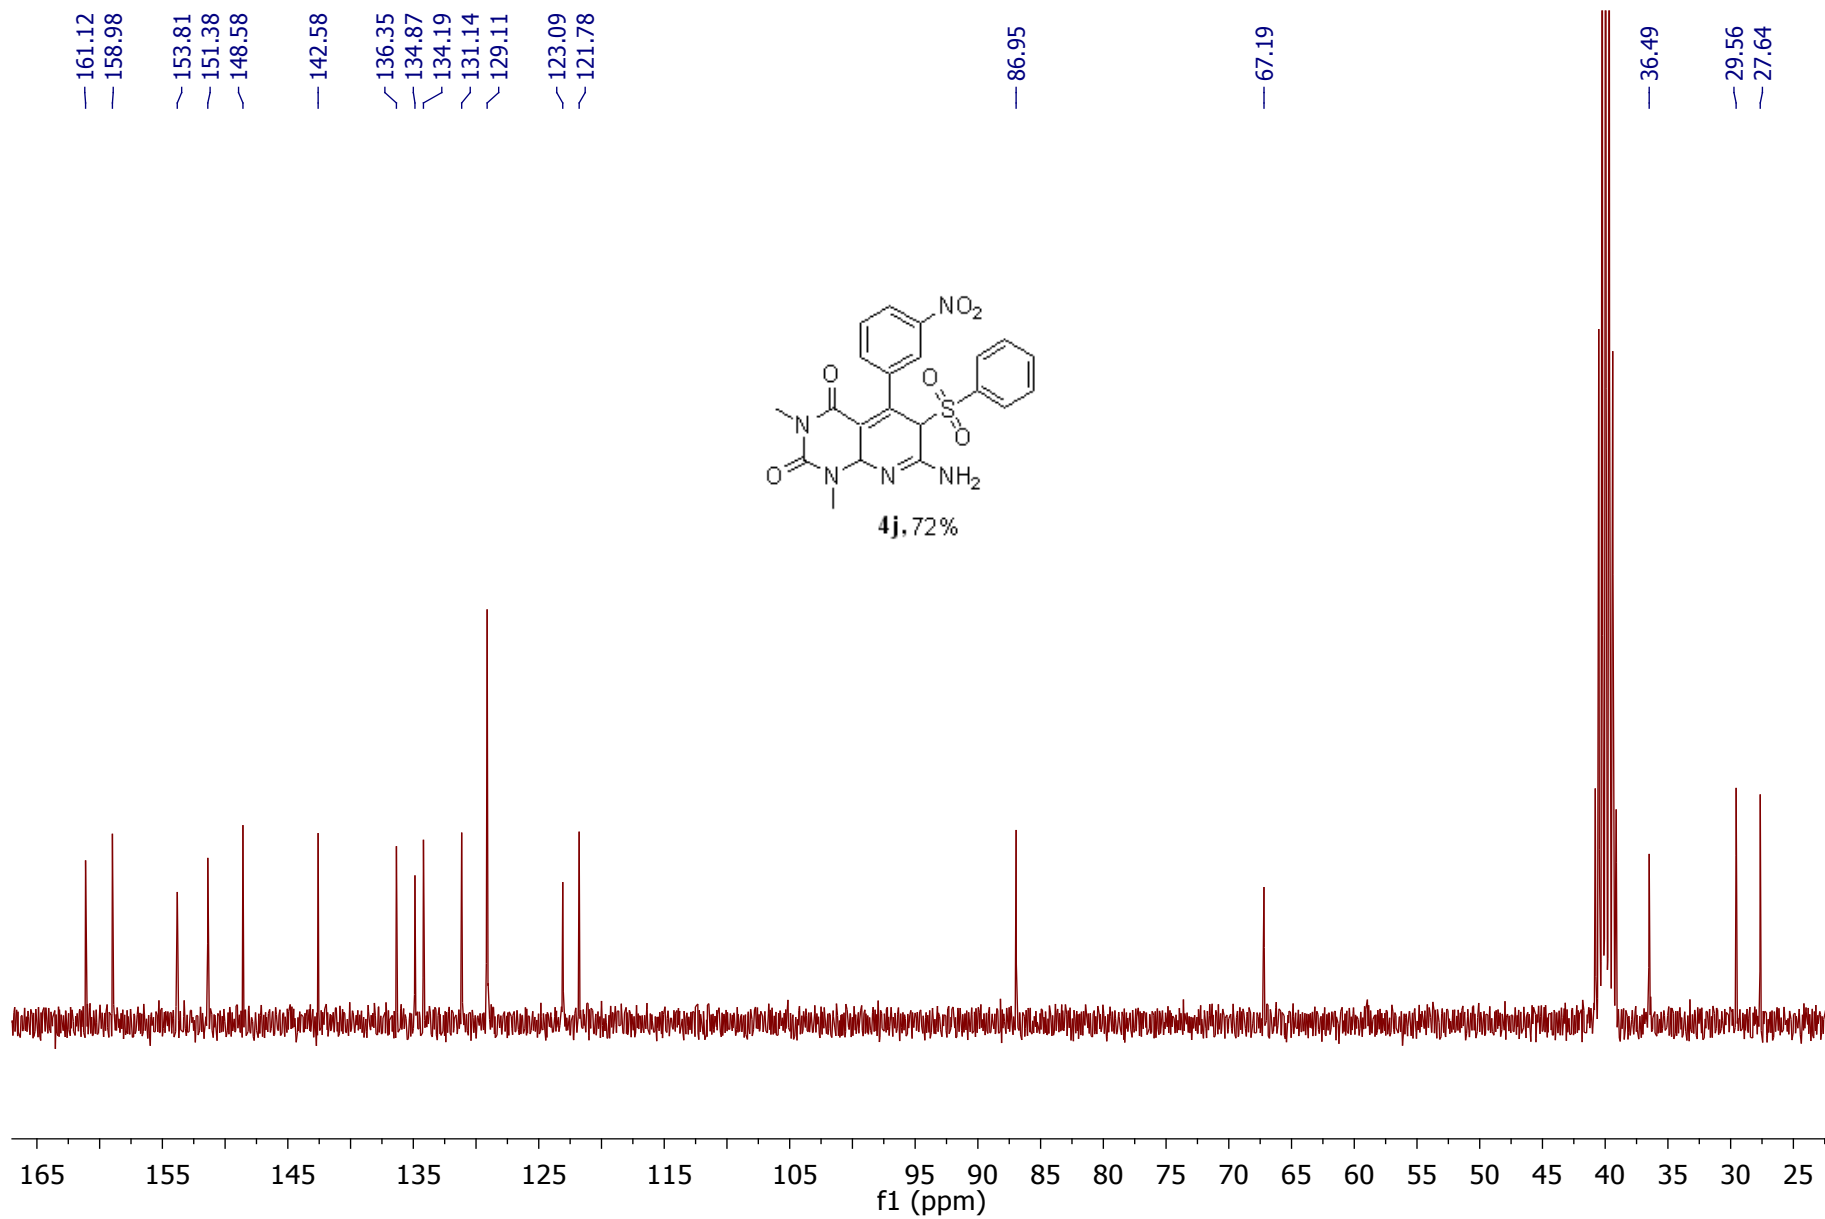

**Fig S-21:** <sup>13</sup>C NMR Spectrum of Product 4j

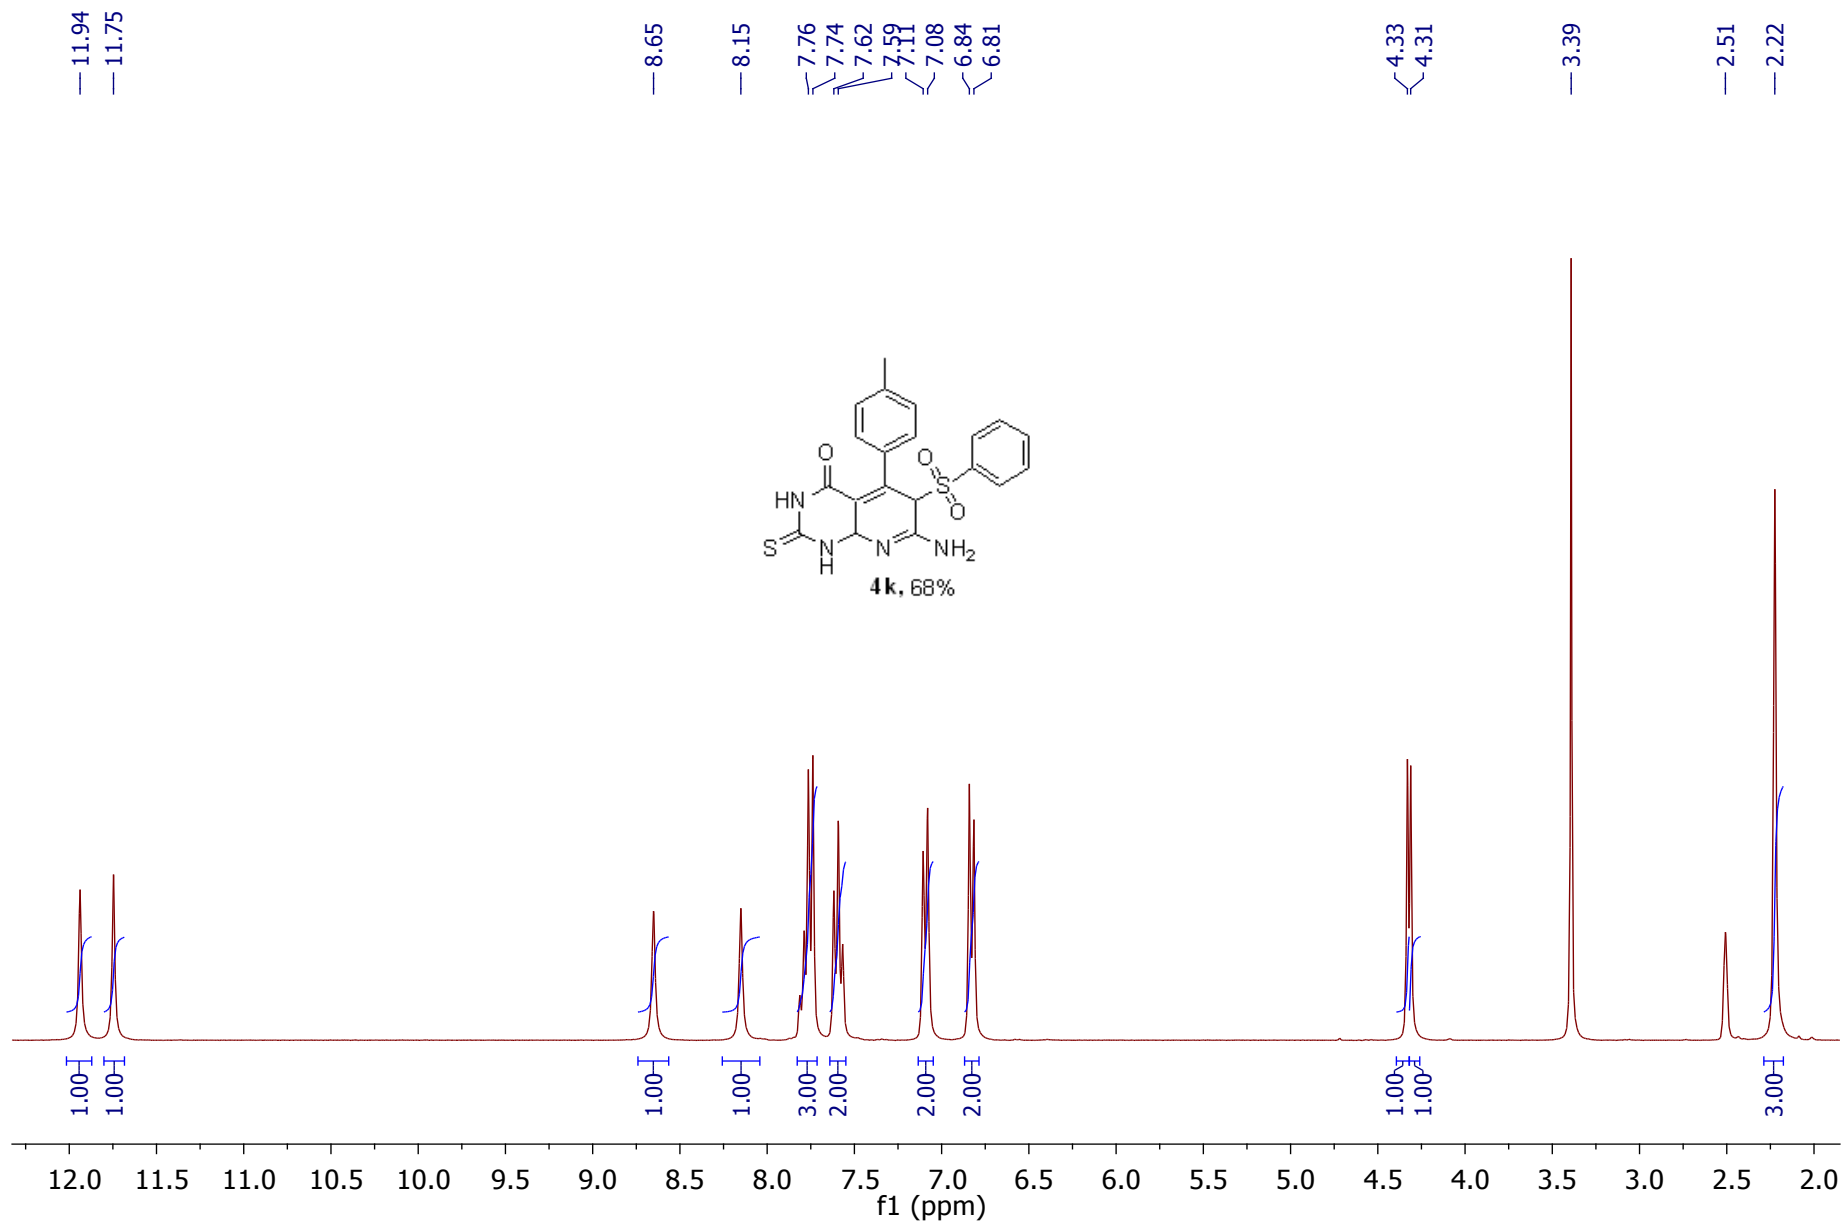

**Fig S-22:** <sup>1</sup>H NMR Spectrum of Product **4k**

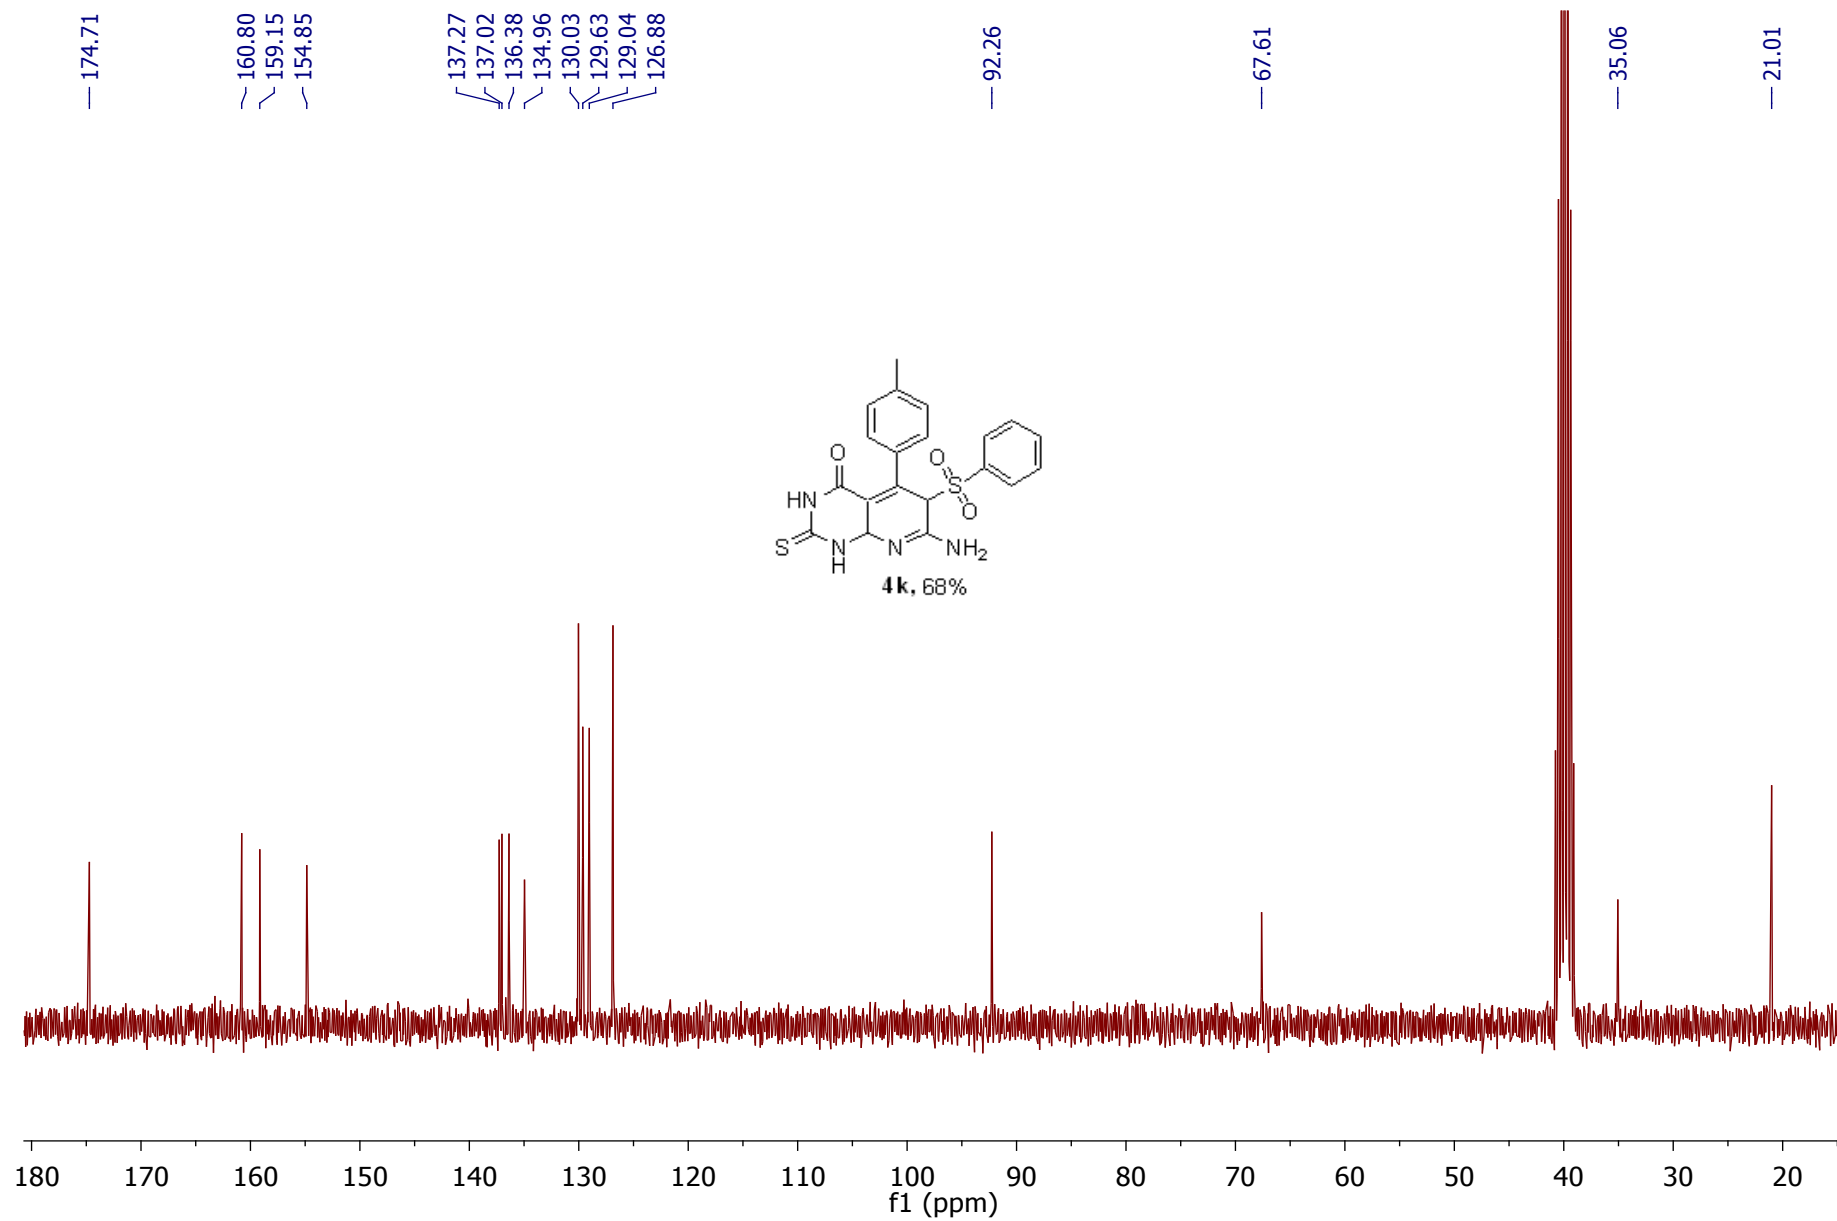

Fig S-23: <sup>13</sup>C NMR Spectrum of Product **4k**

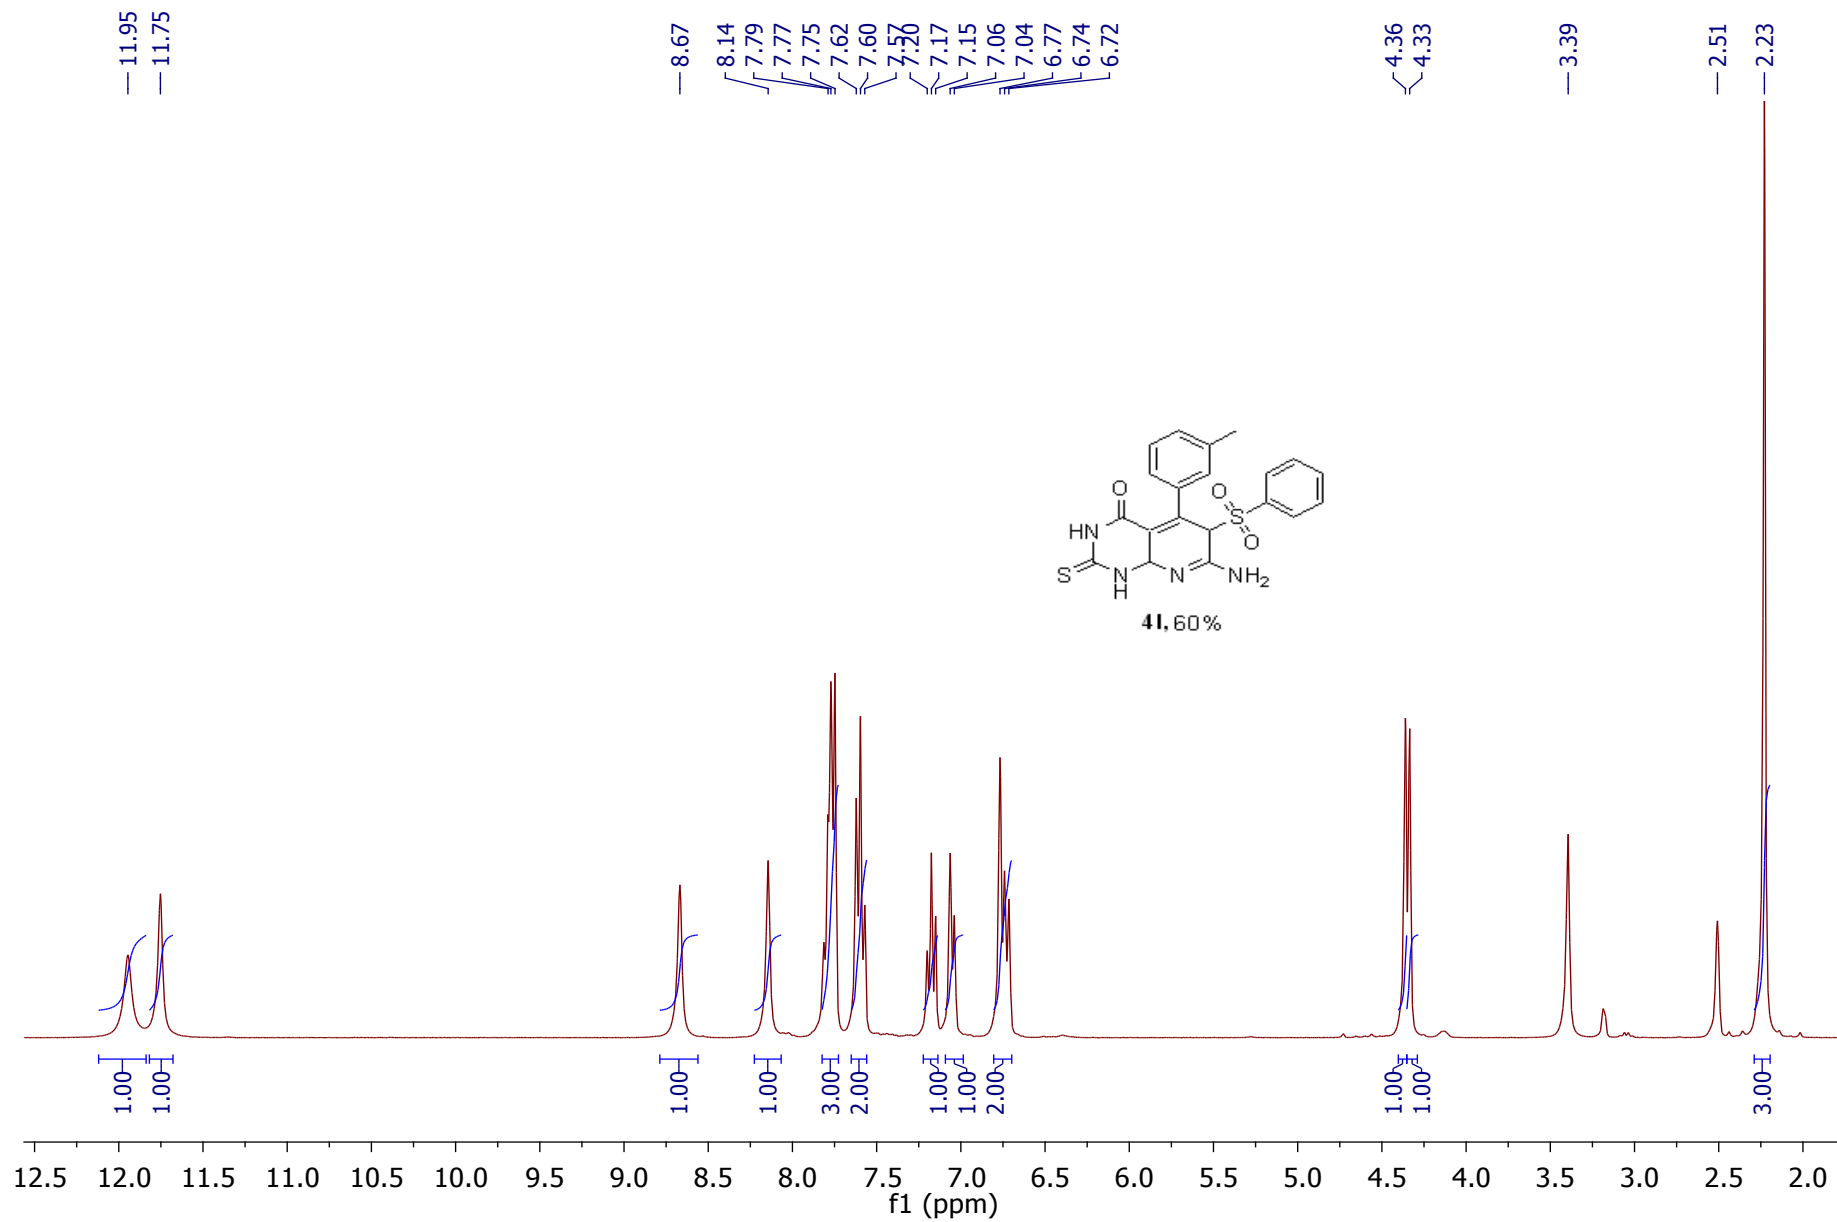

**Fig S-24: <sup>1</sup>H NMR Spectrum of Product 4I**

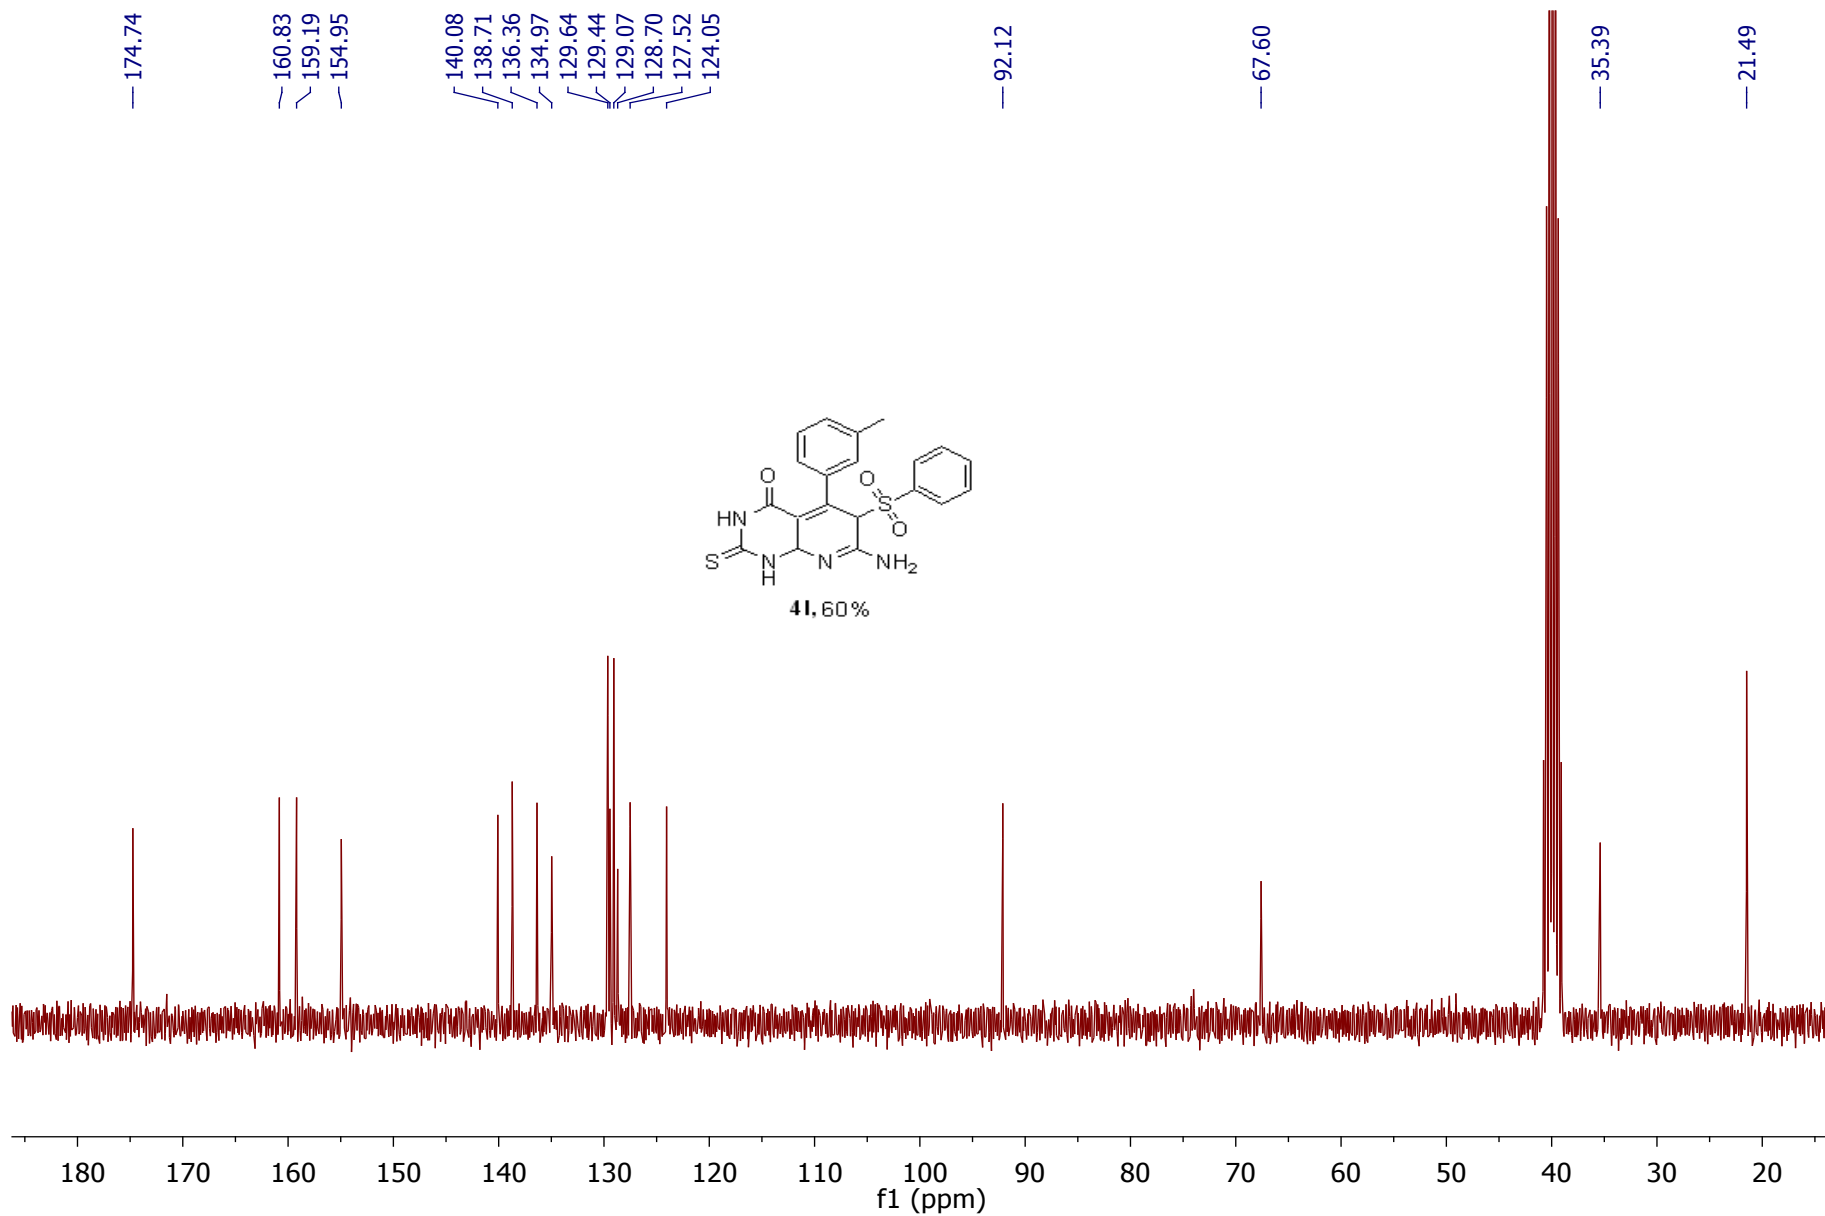

**Fig S-25:** <sup>13</sup>C NMR Spectrum of Product 41

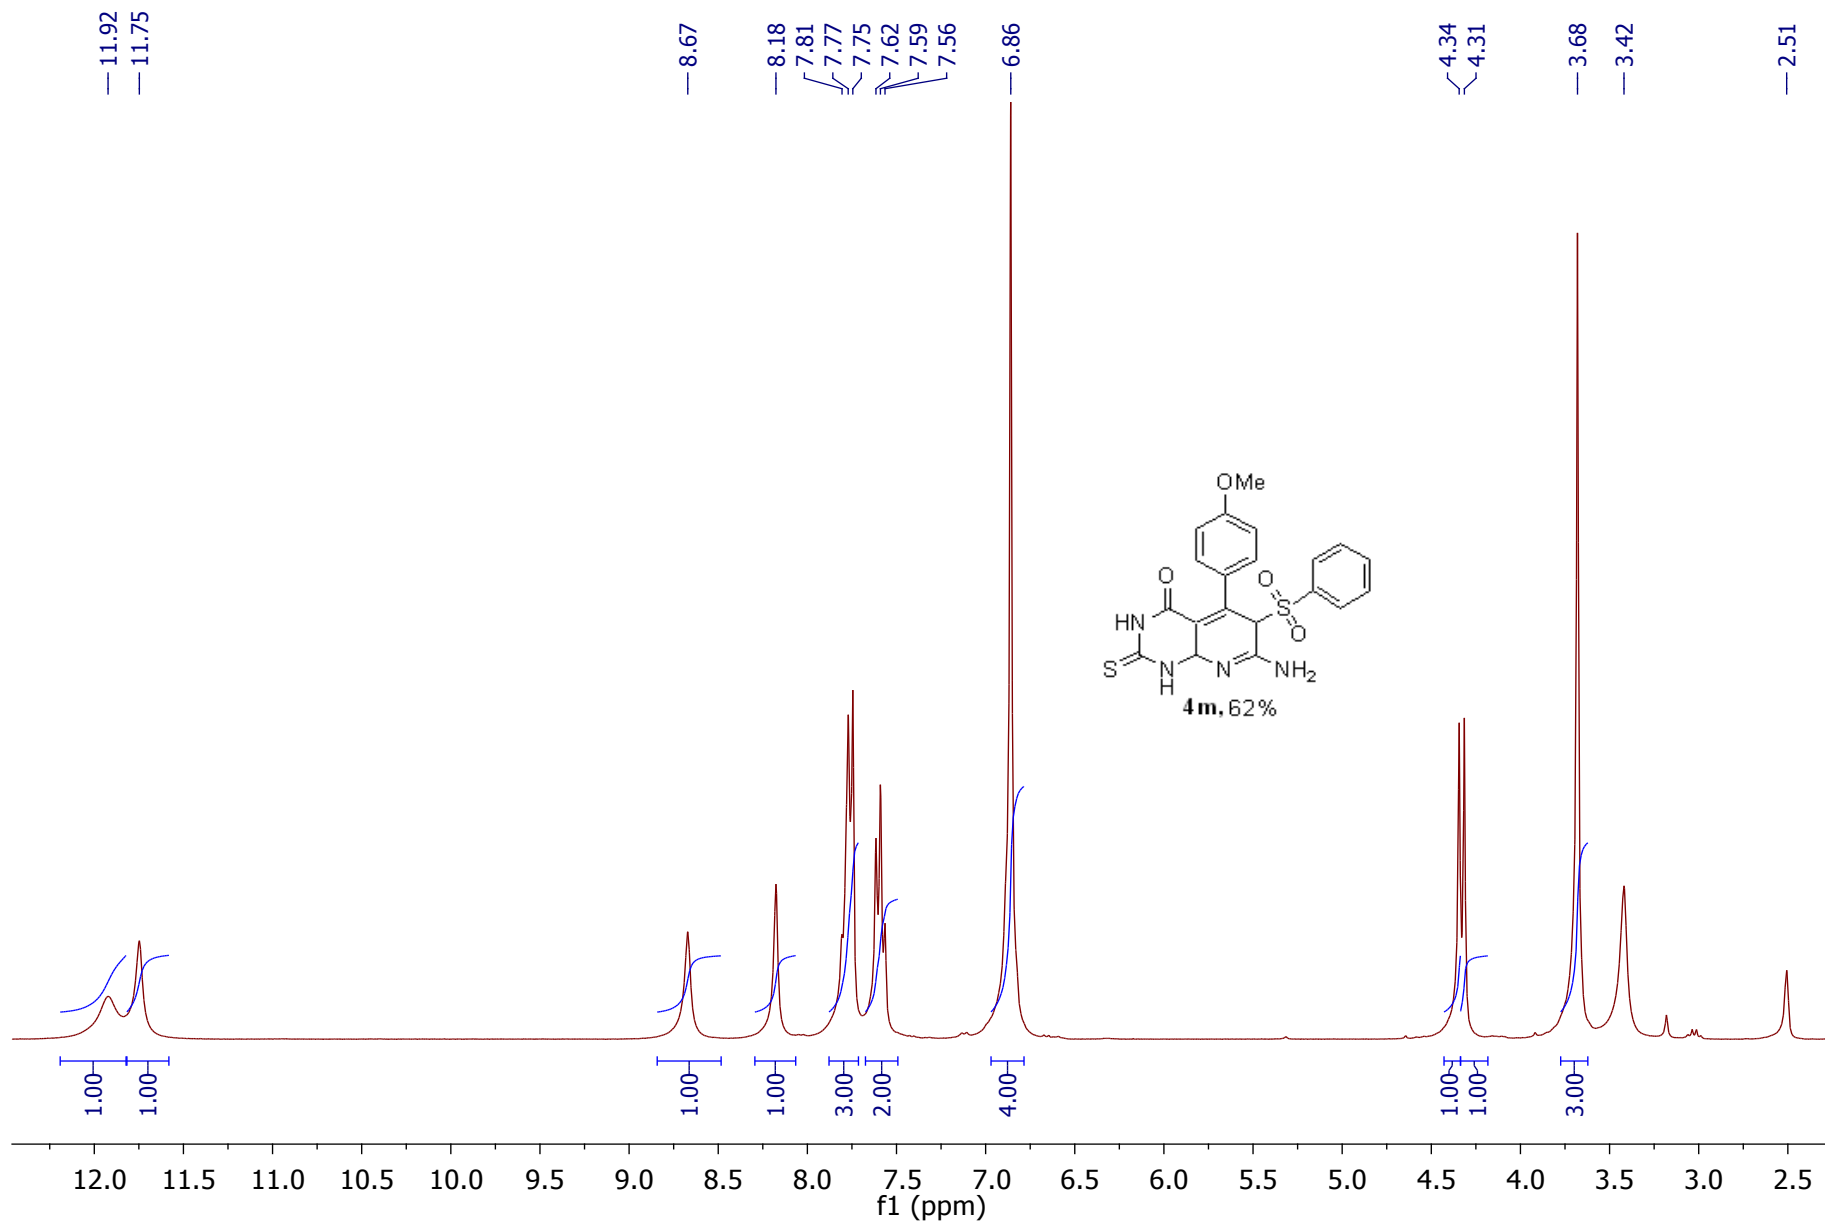

**Fig S-26:**  $^1\text{H}$  NMR Spectrum of Product **4m**

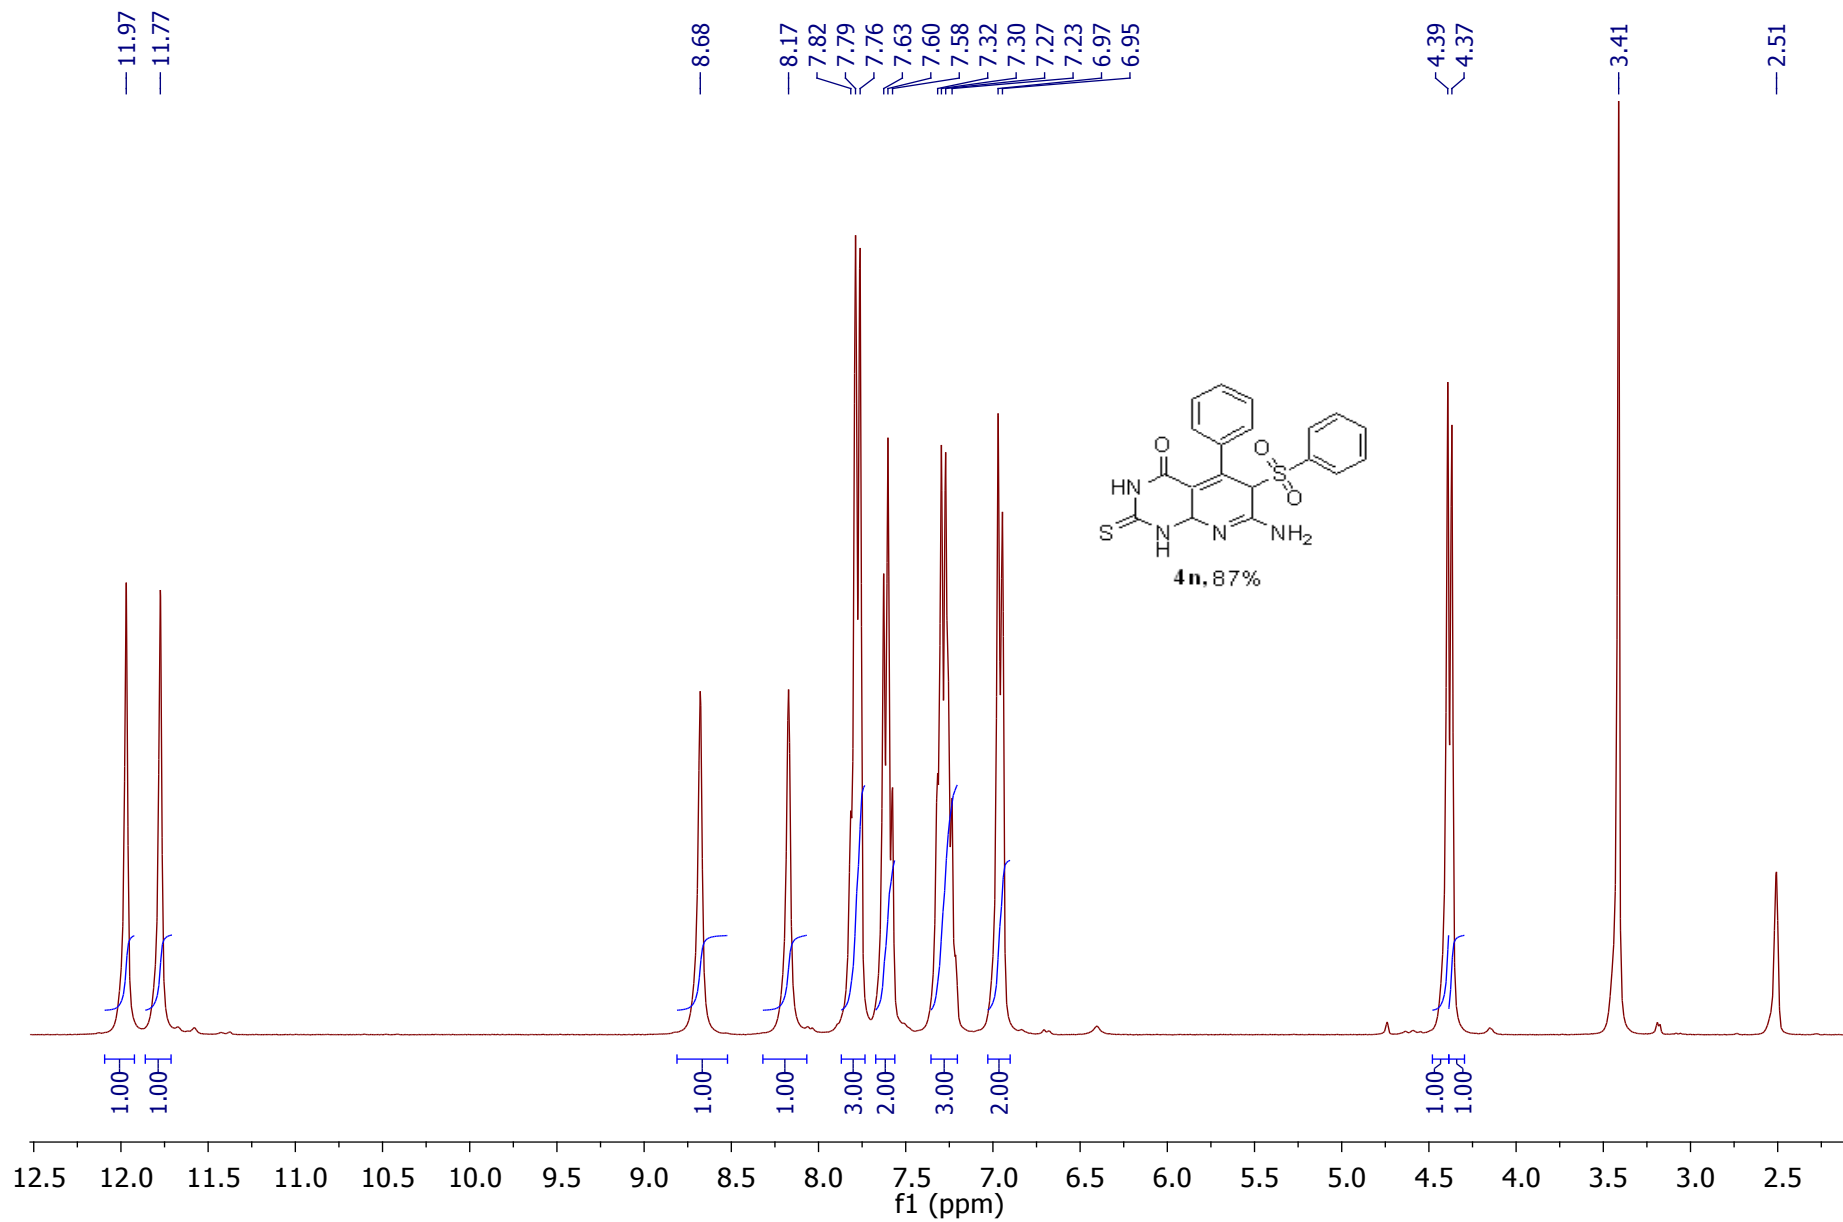

**Fig S-27: <sup>1</sup>H NMR Spectrum of Product **4n****



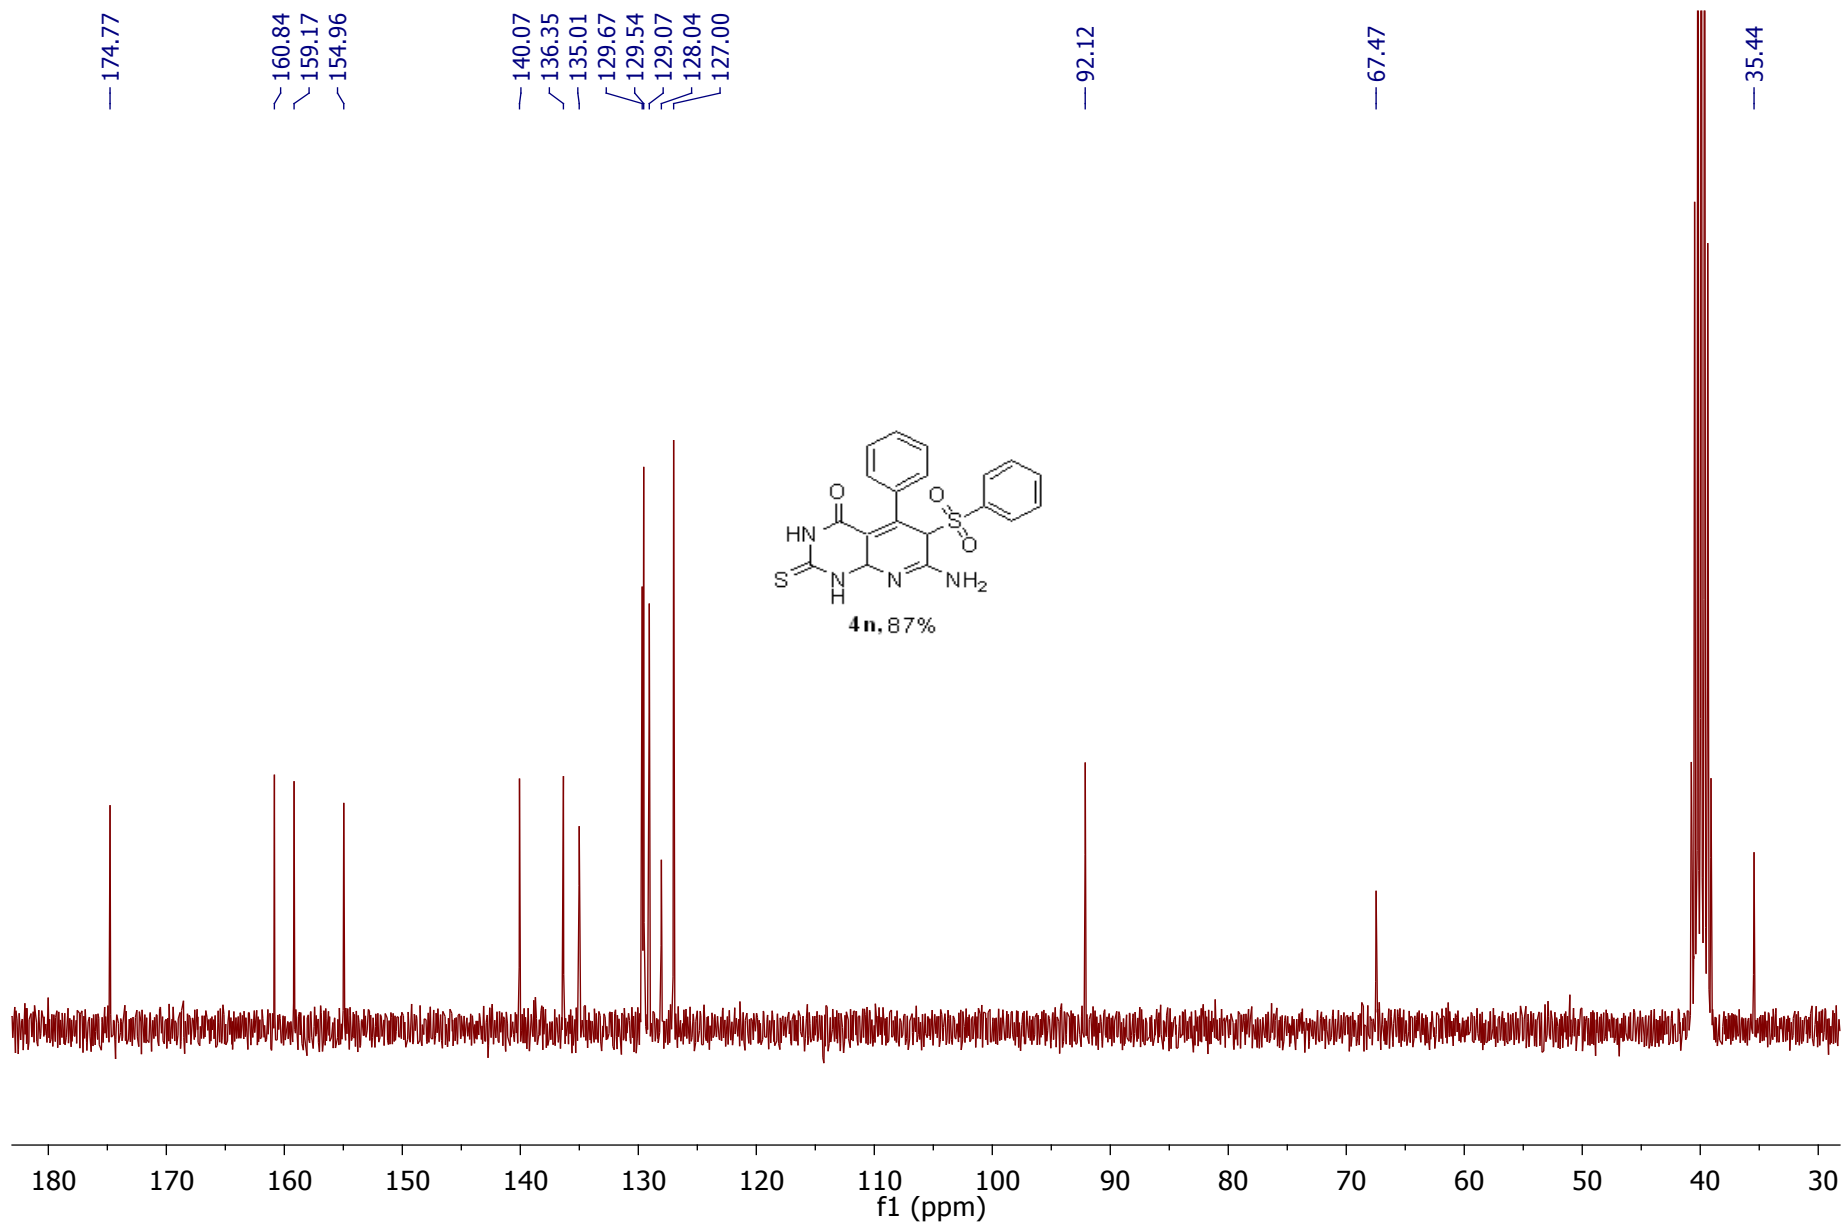

**Fig S-28:** <sup>13</sup>C NMR Spectrum of Product **4n**

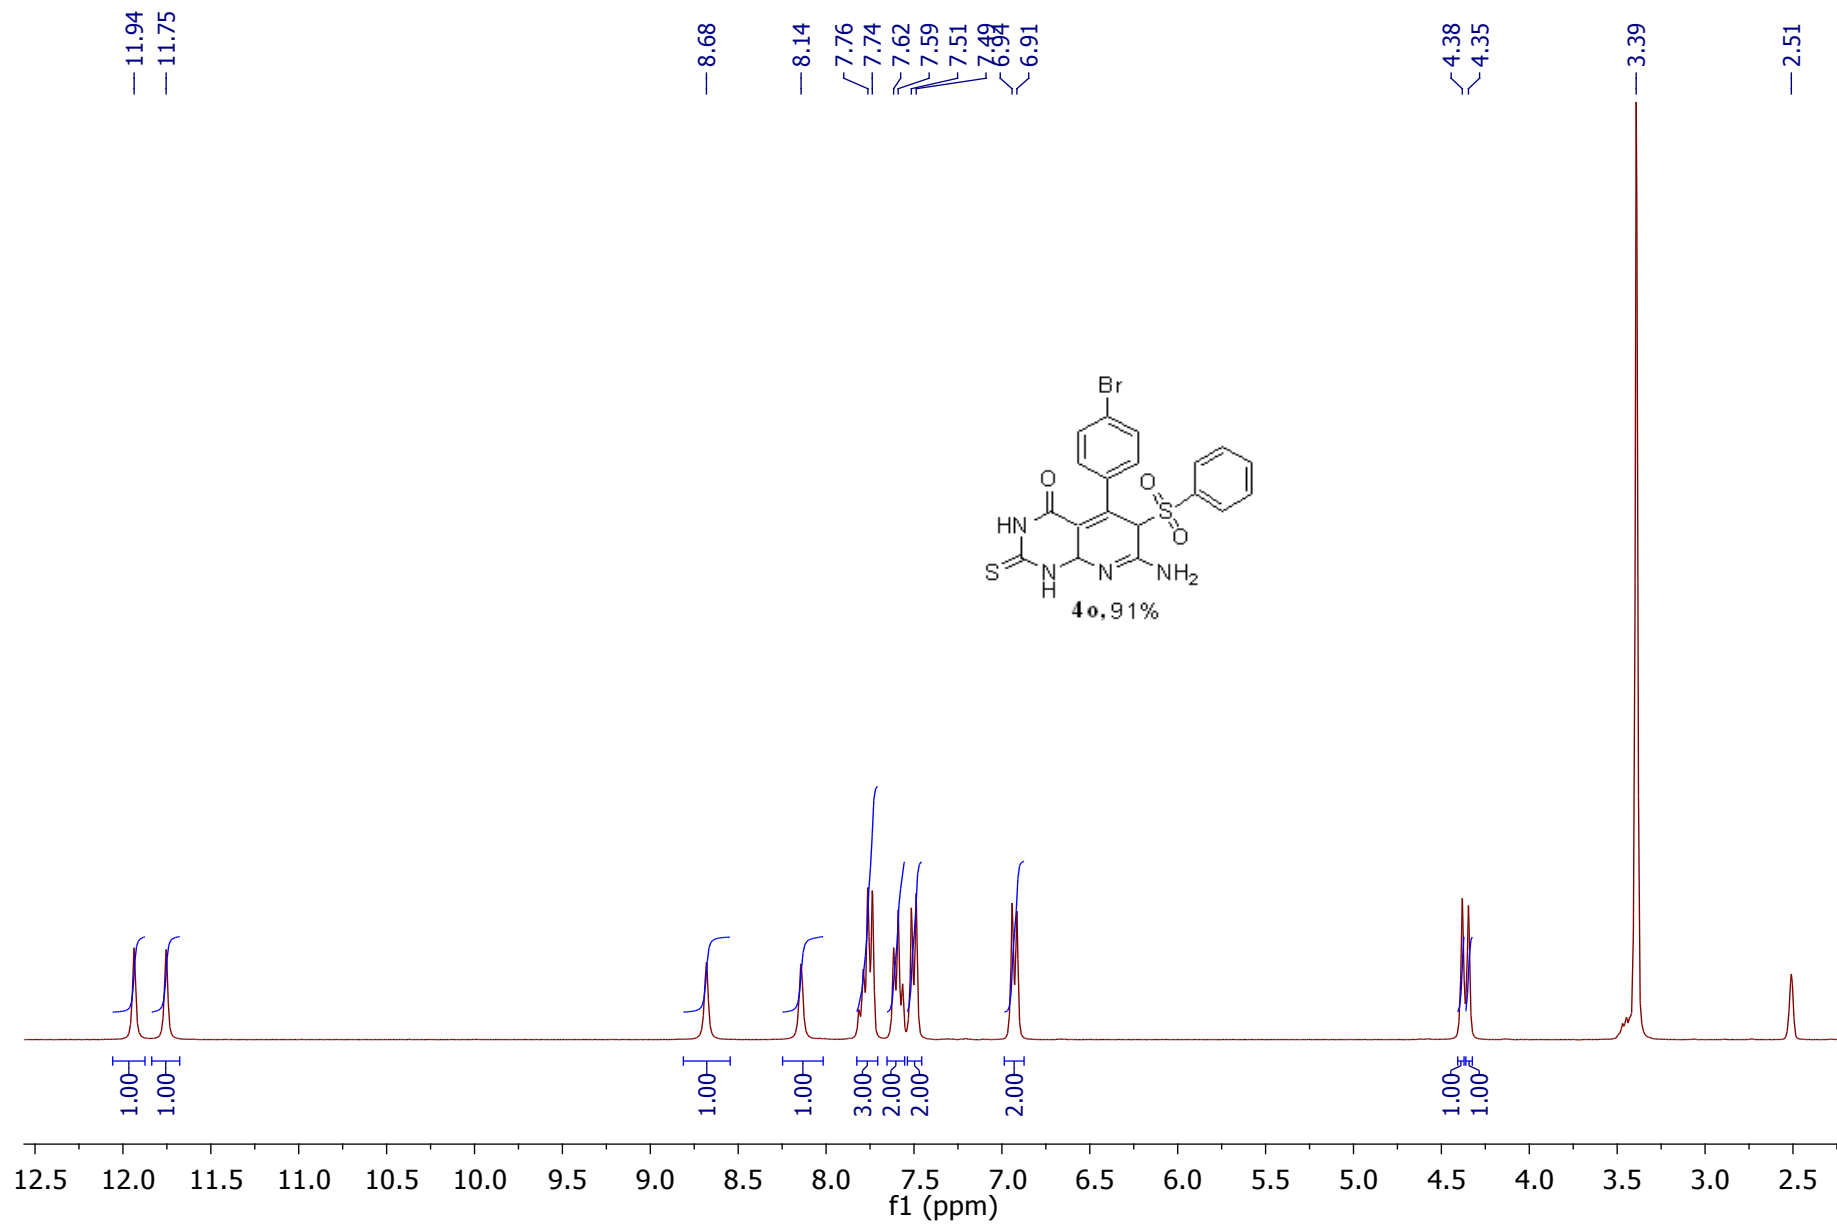

**Fig S-29:**  $^1\text{H}$  NMR Spectrum of Product **4o**

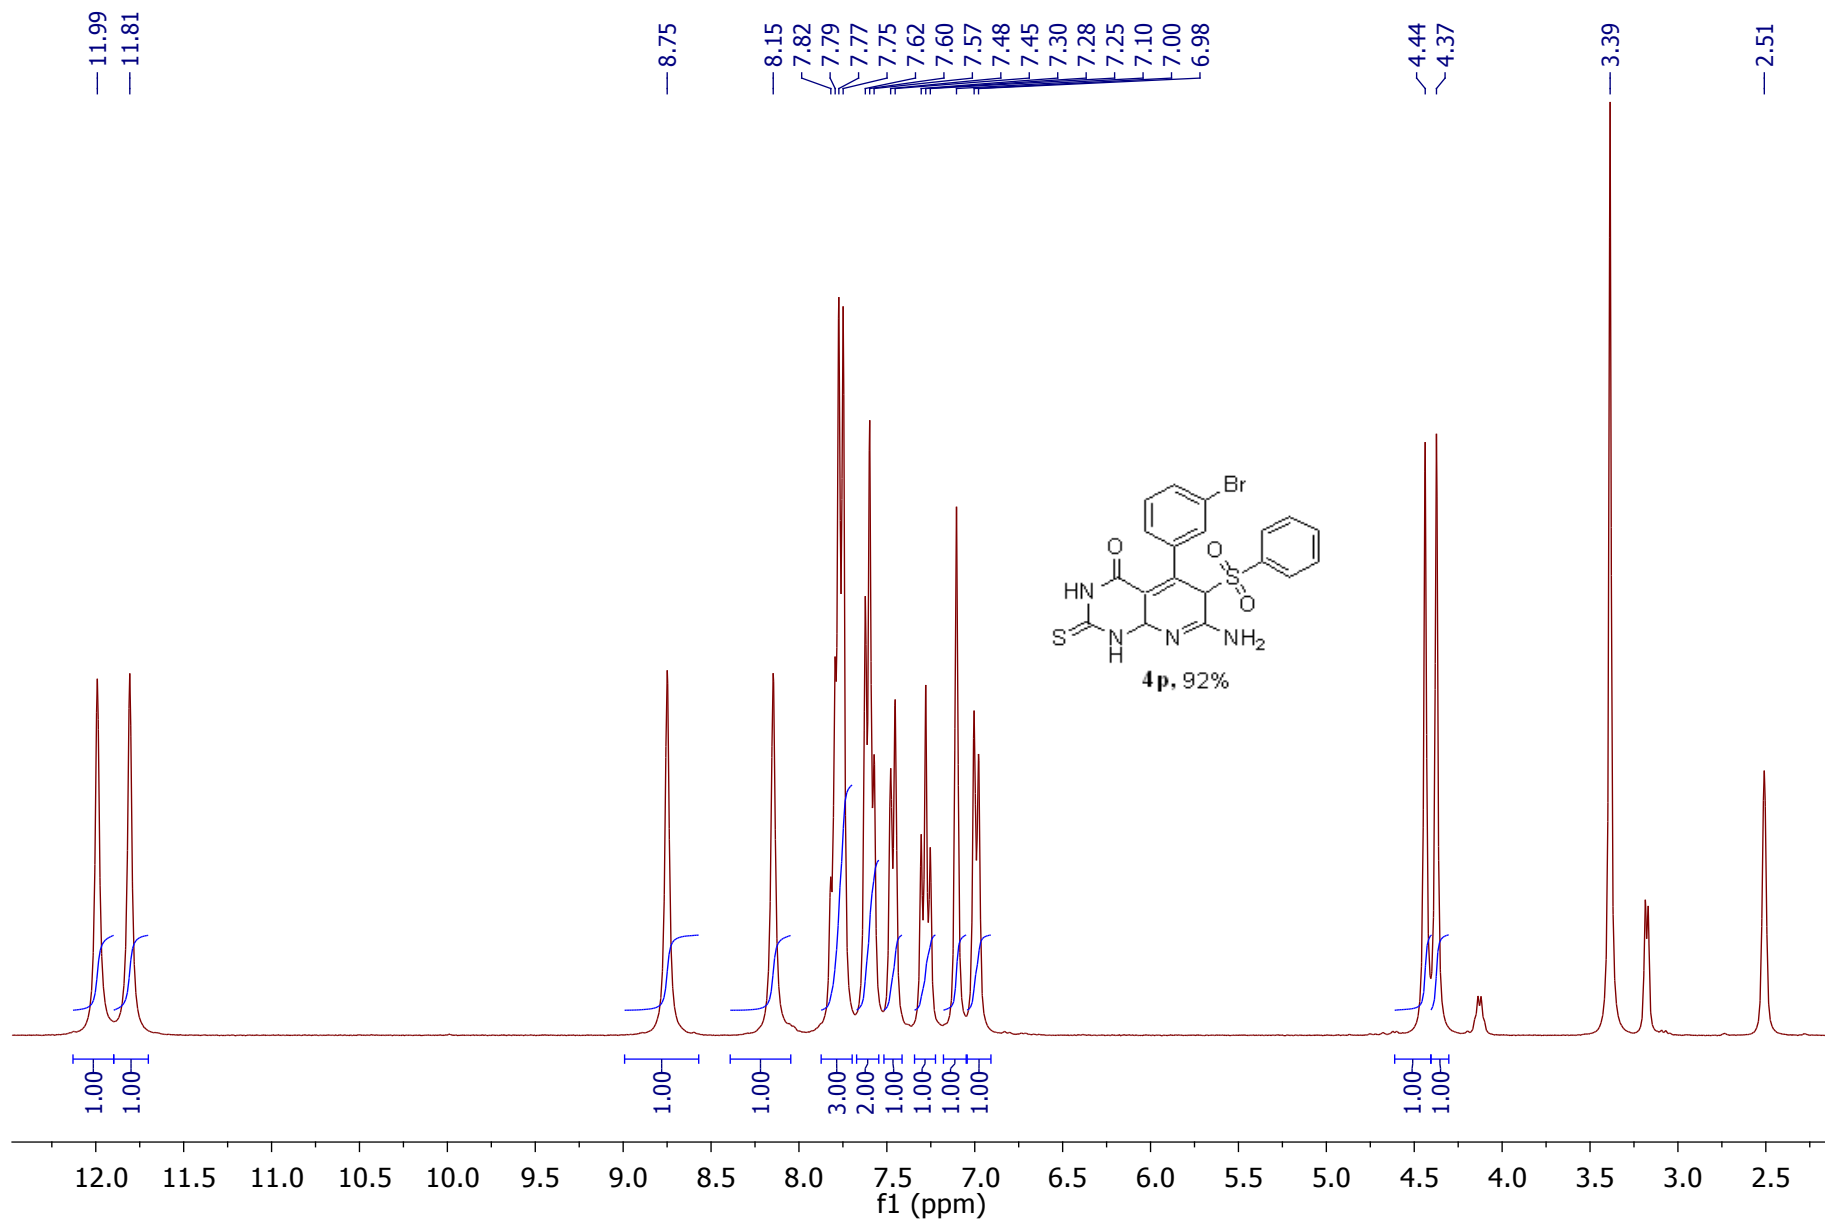

**Fig S-30:** <sup>1</sup>H NMR Spectrum of Product **4p**

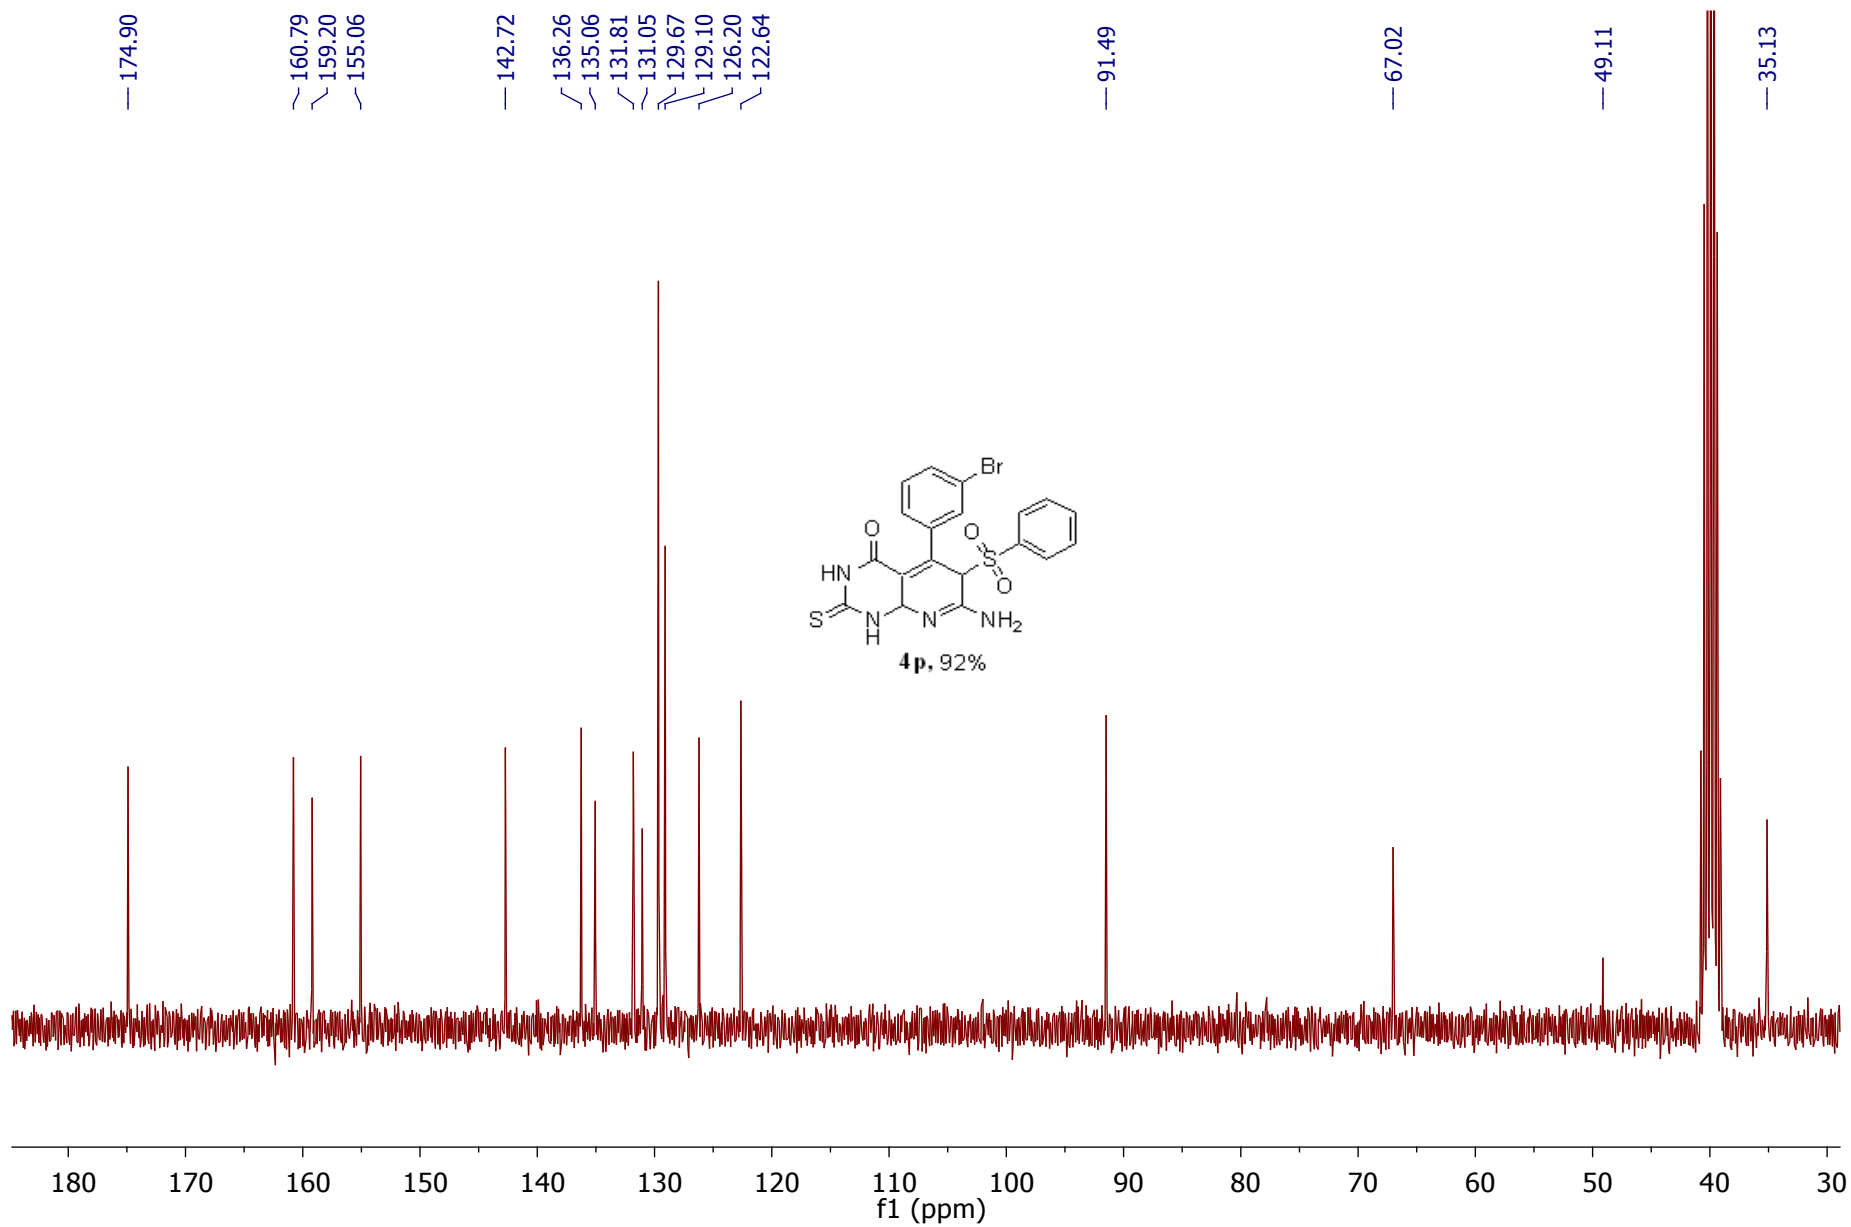

**Fig S-31:**  $^{13}\text{C}$  NMR Spectrum of Product **4p**

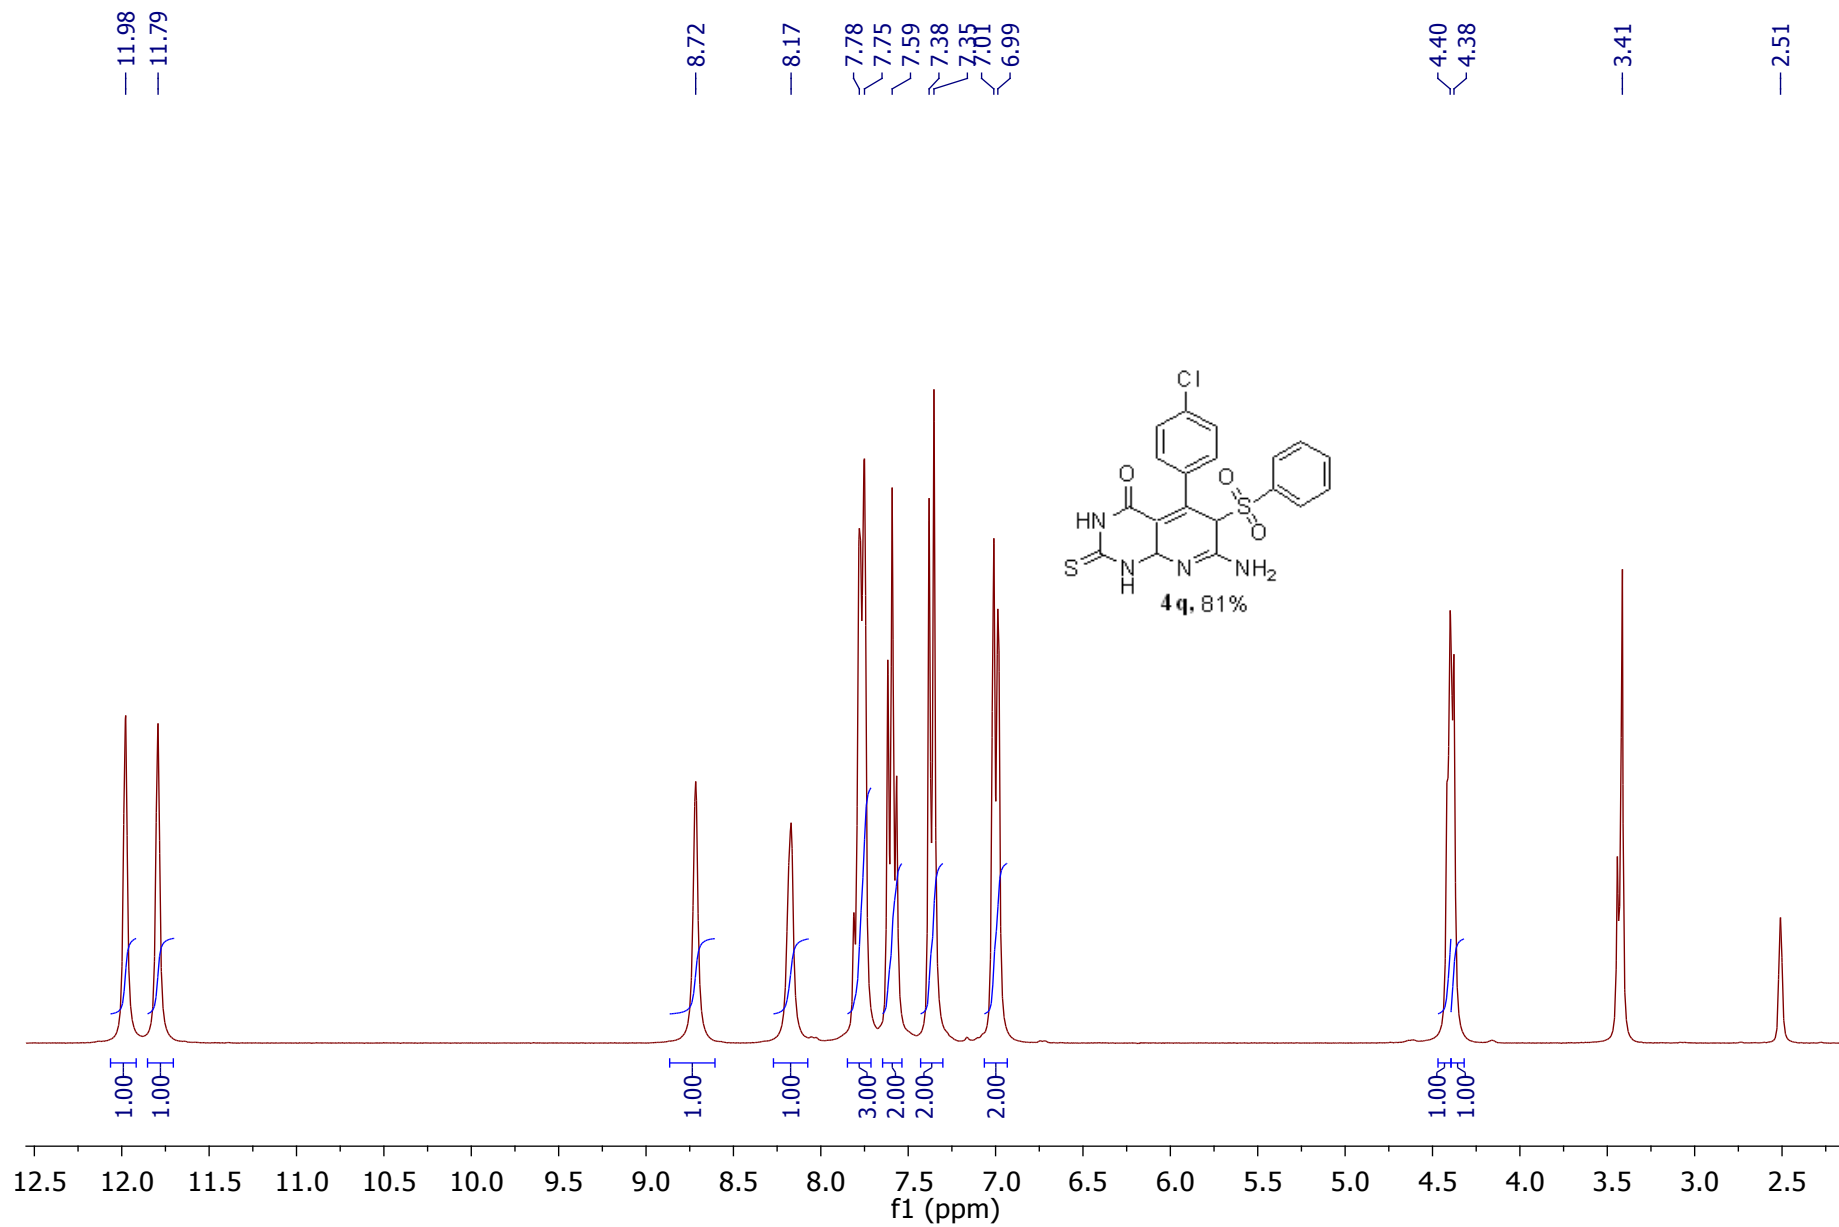

**Fig S-32:**  $^1\text{H}$  NMR Spectrum of Product **4q**

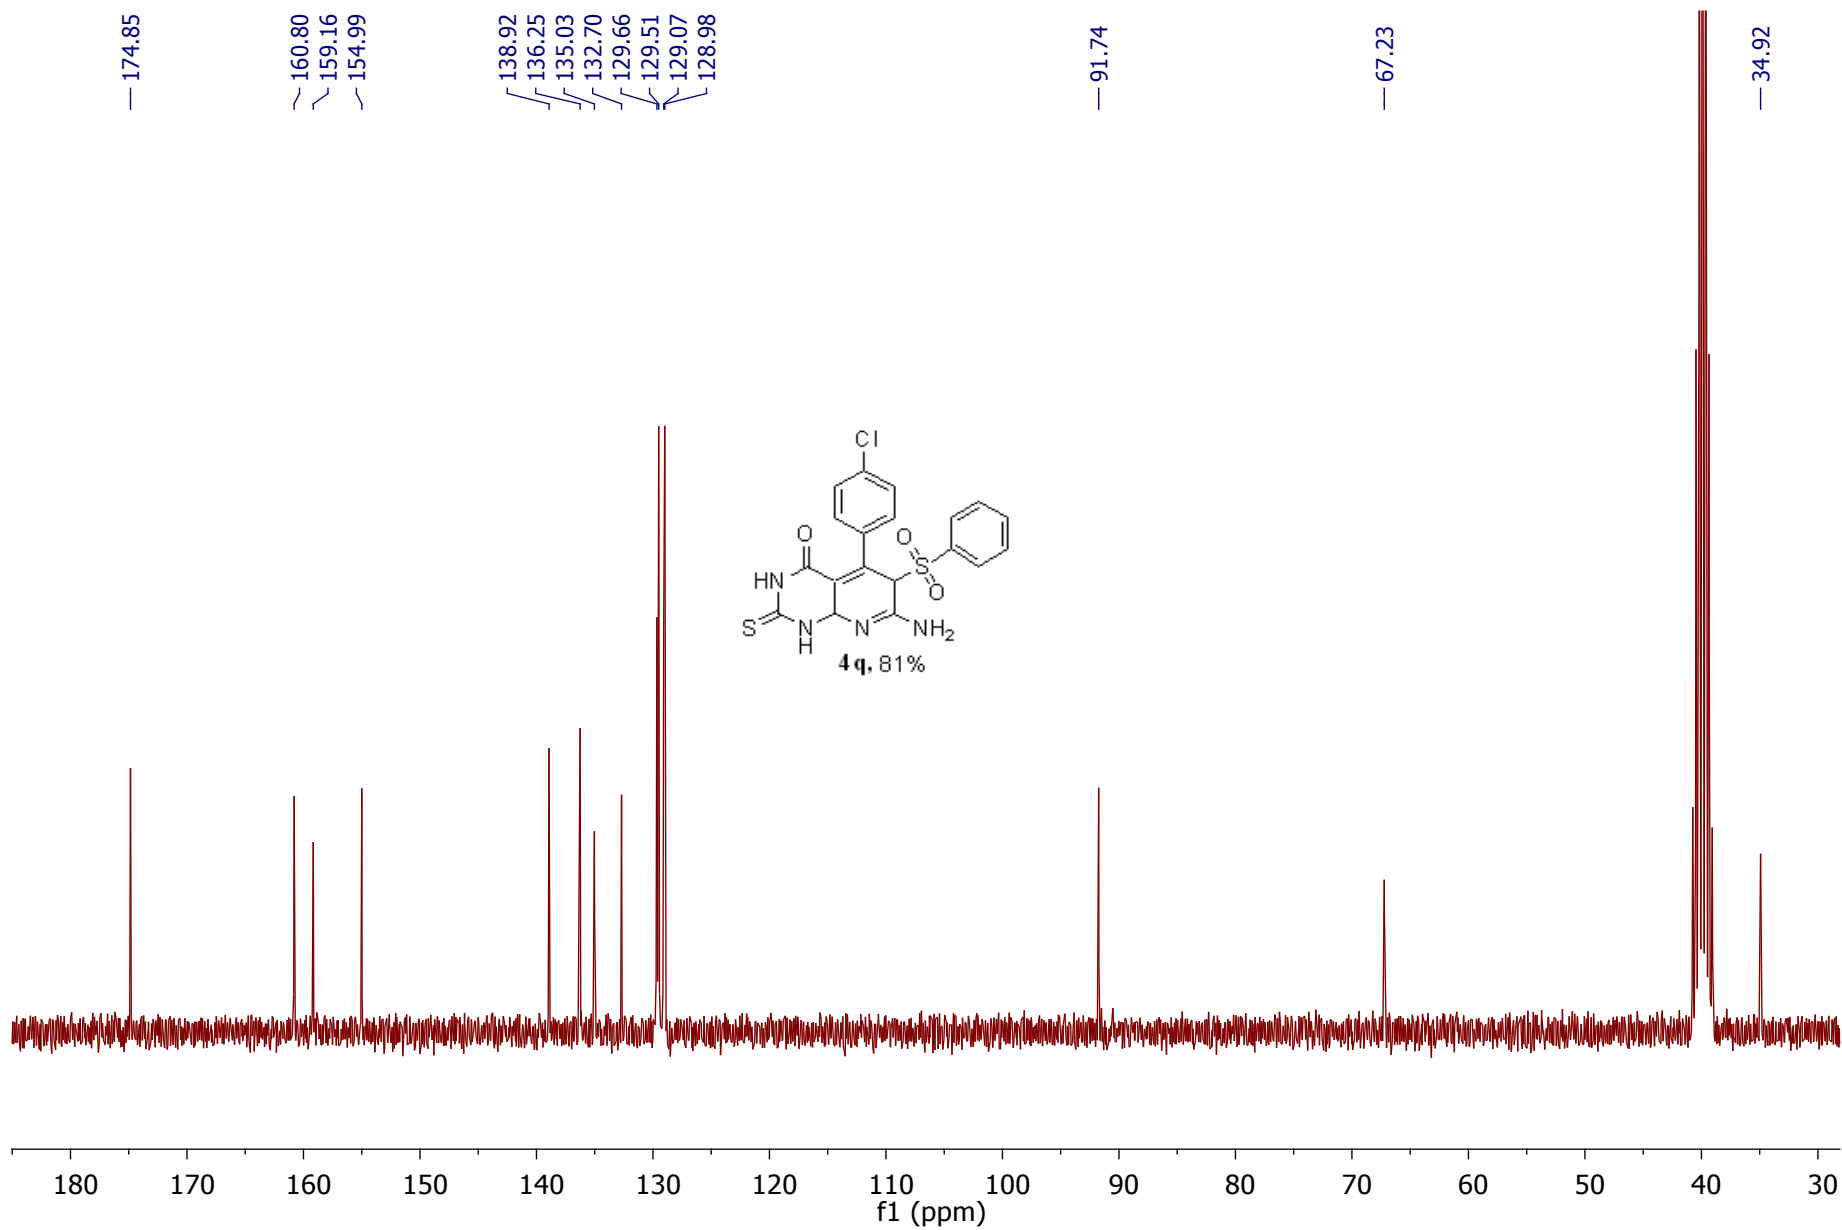

**Fig S-33:** <sup>13</sup>C NMR Spectrum of Product **4q**

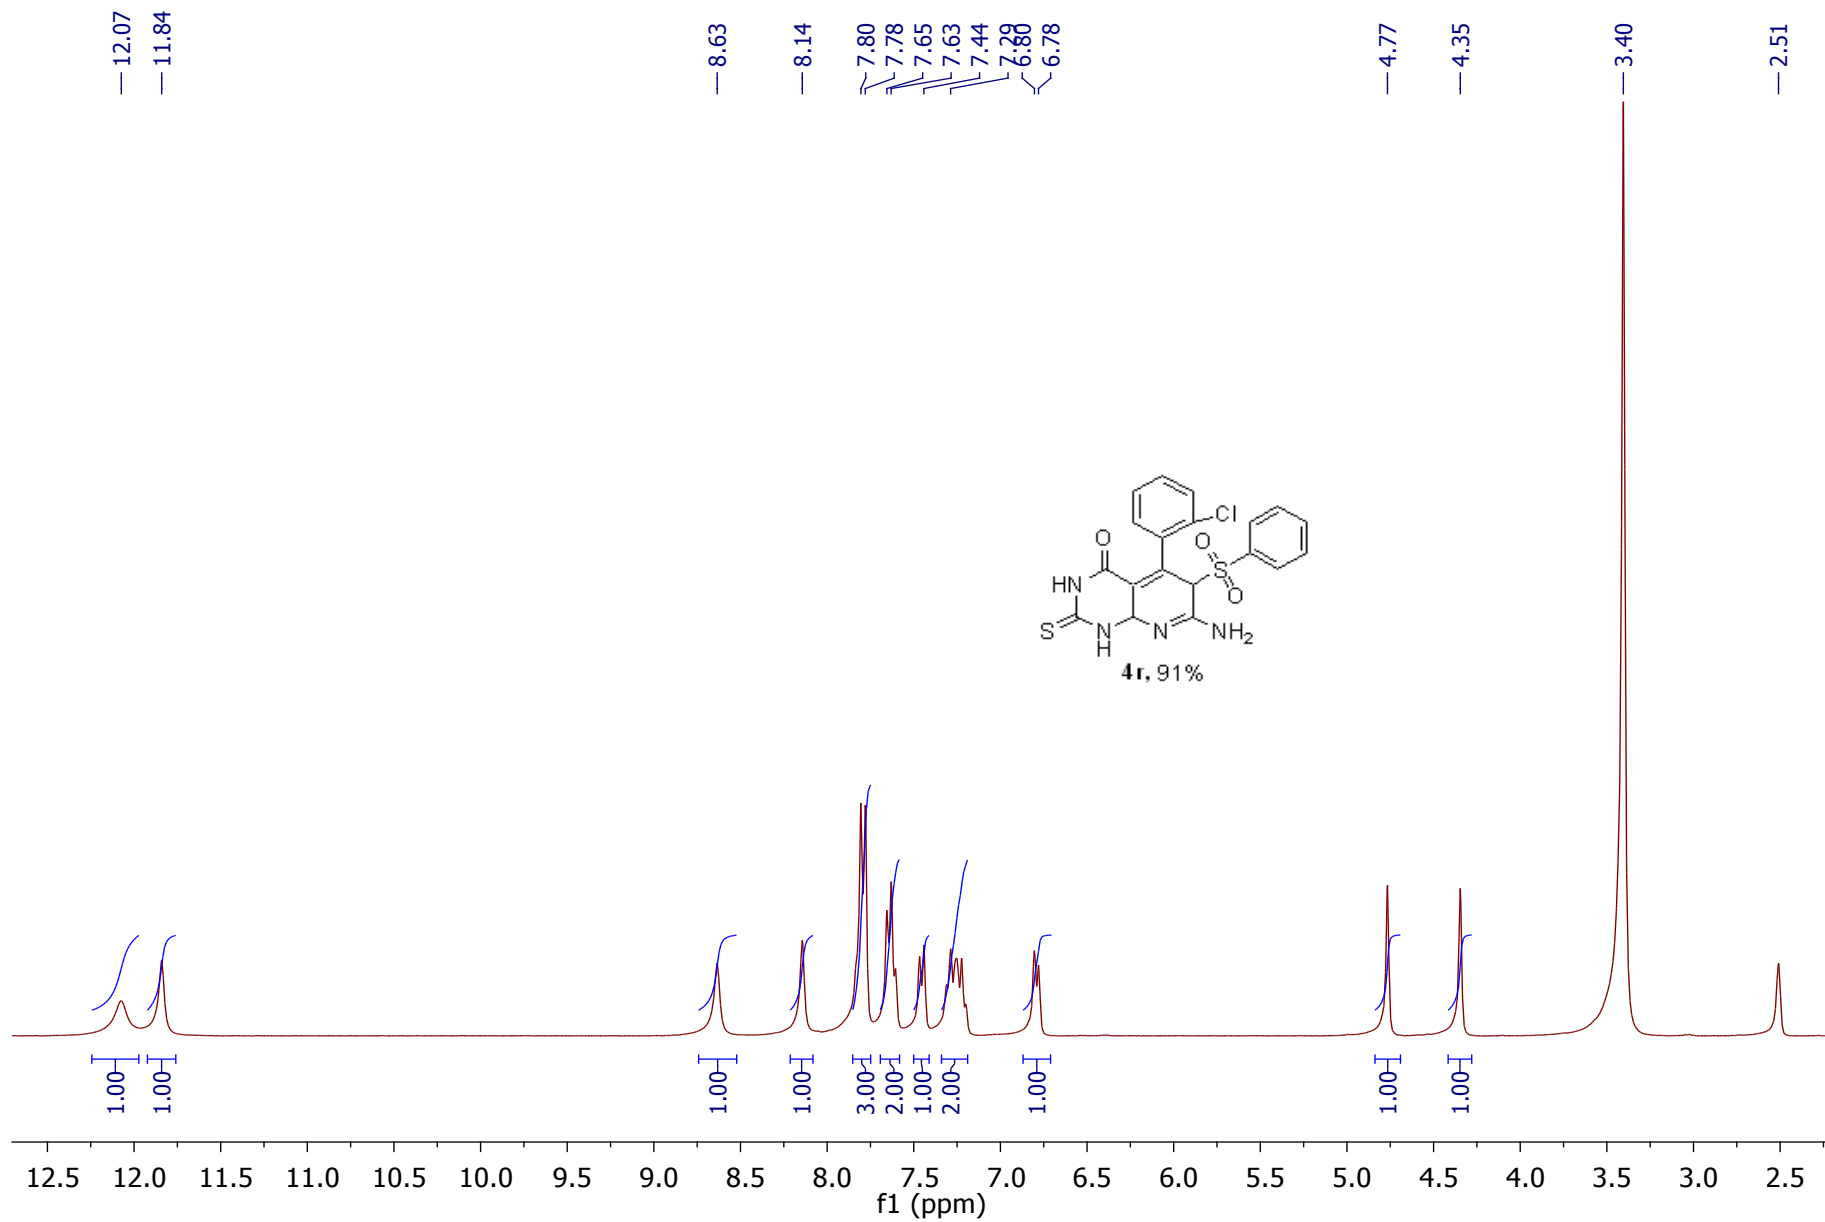

**Fig S-34:** <sup>1</sup>H NMR Spectrum of Product **4r**

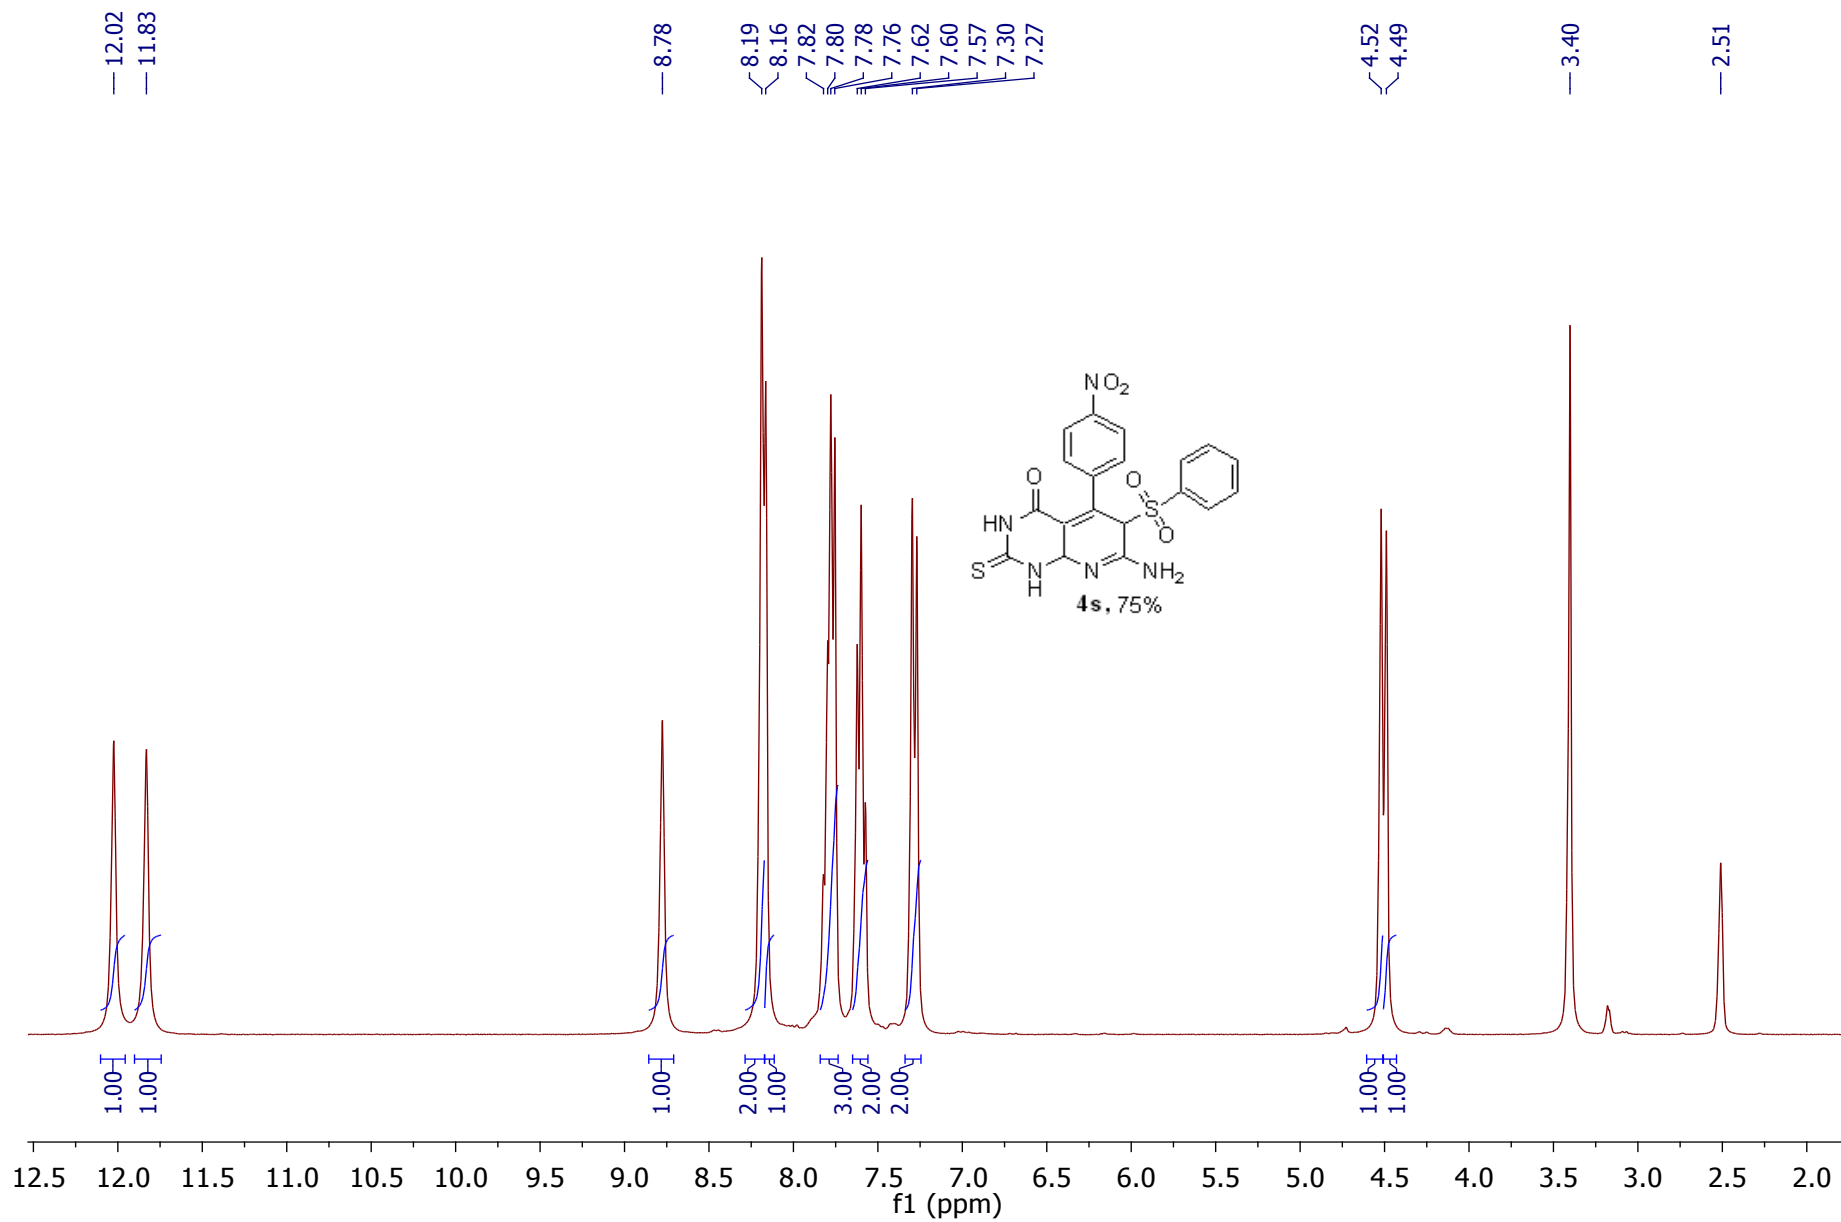

**Fig S-35: <sup>1</sup>H NMR Spectrum of Product **4s****



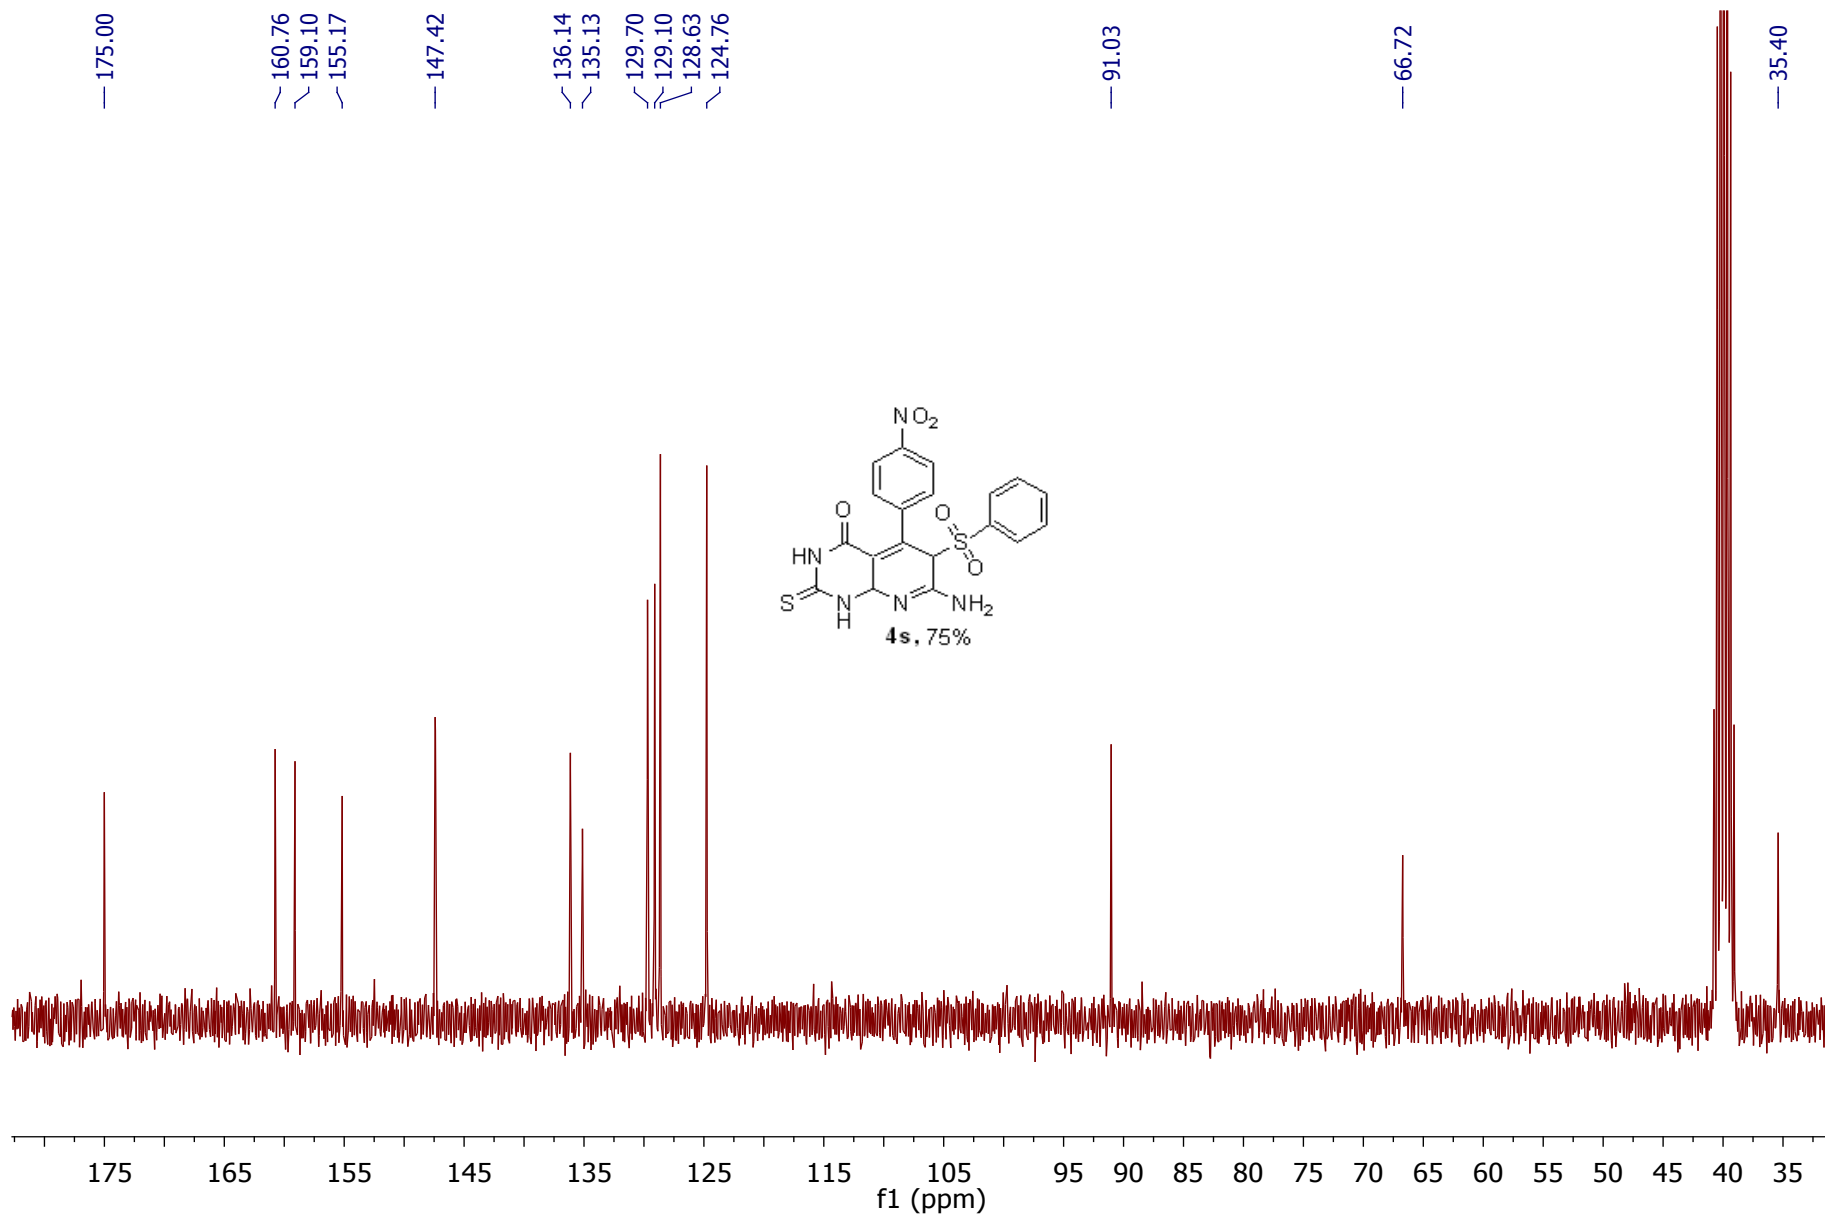

Fig S-36: <sup>13</sup>C NMR Spectrum of Product 4s

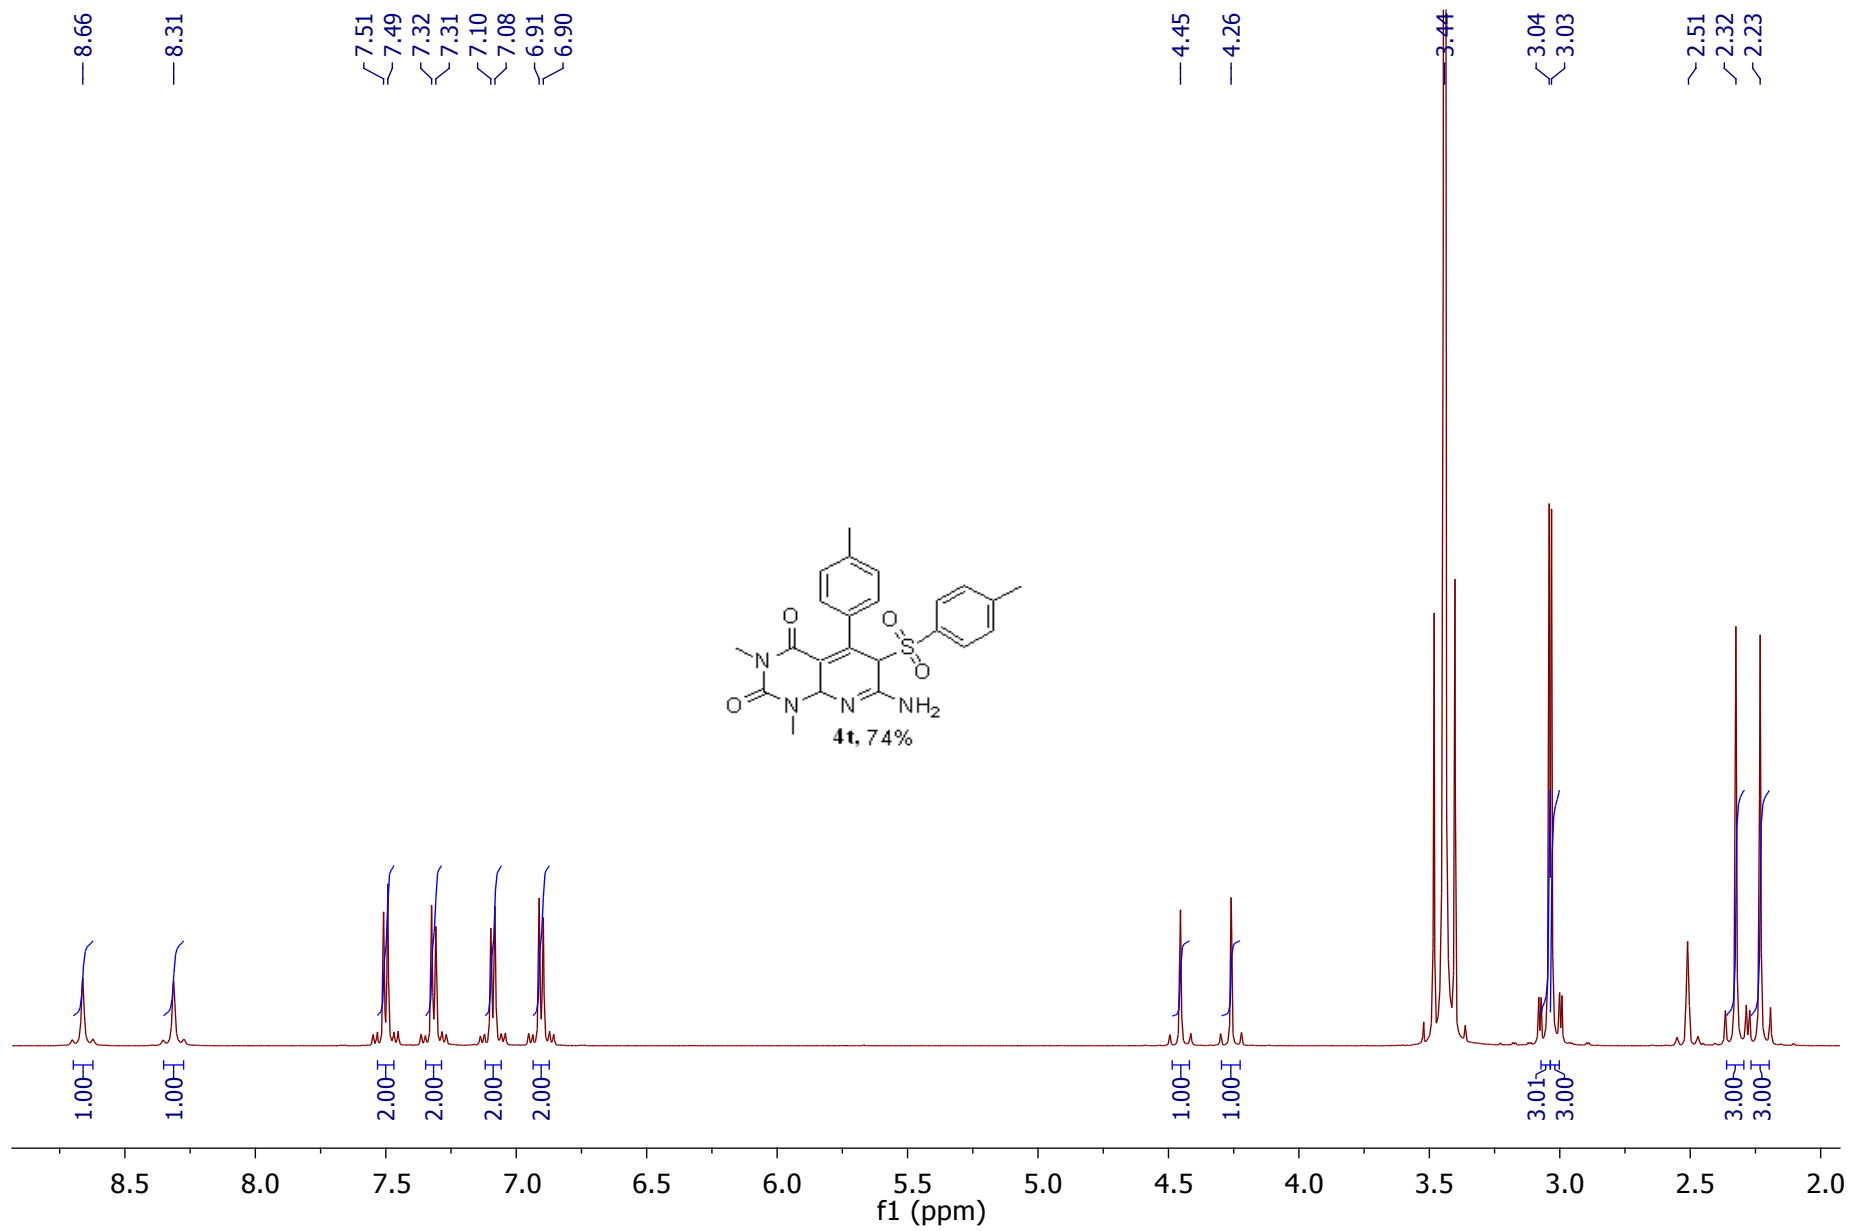

**Fig S-37: <sup>1</sup>H NMR Spectrum of Product 4t**

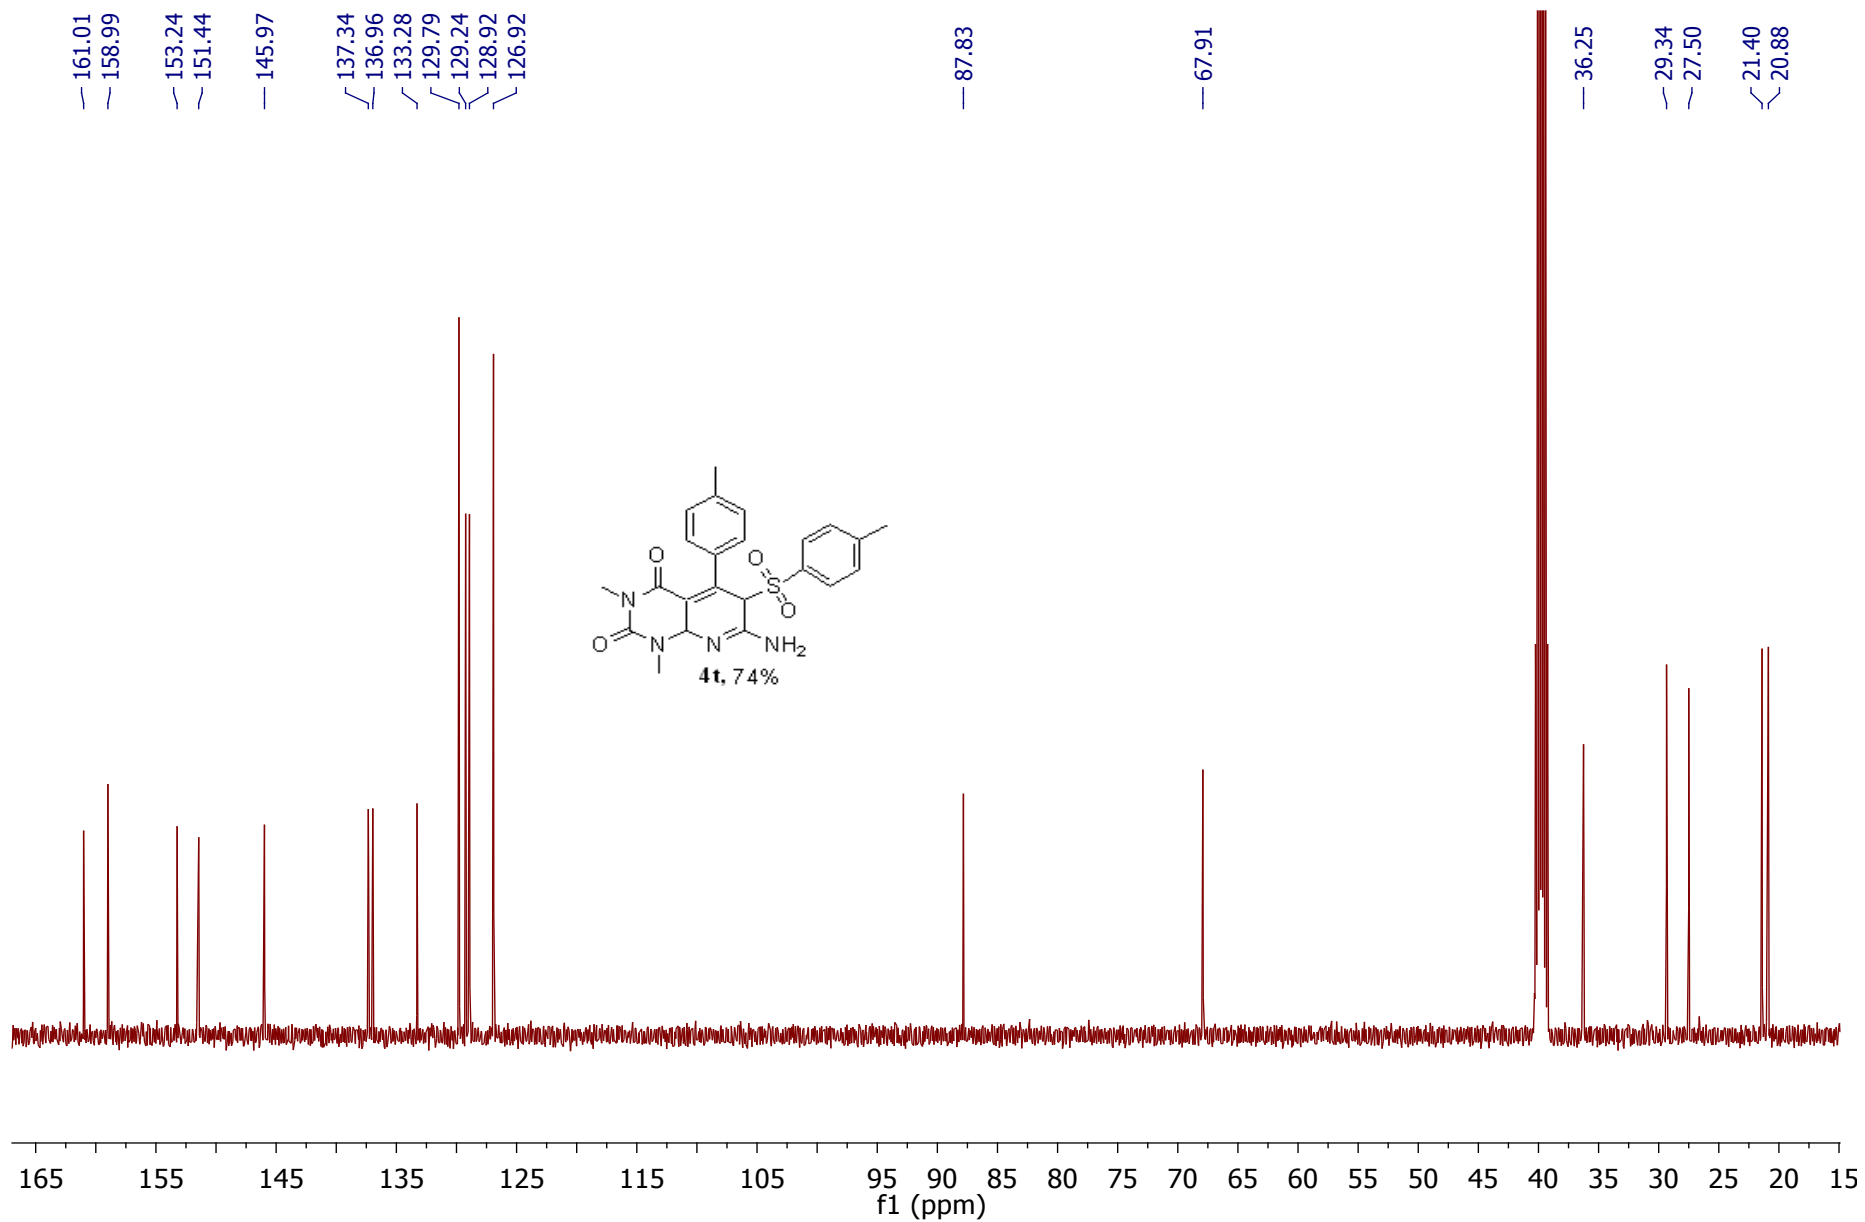

**Fig S-38:**  $^{13}\text{C}$  NMR Spectrum of Product **4t**

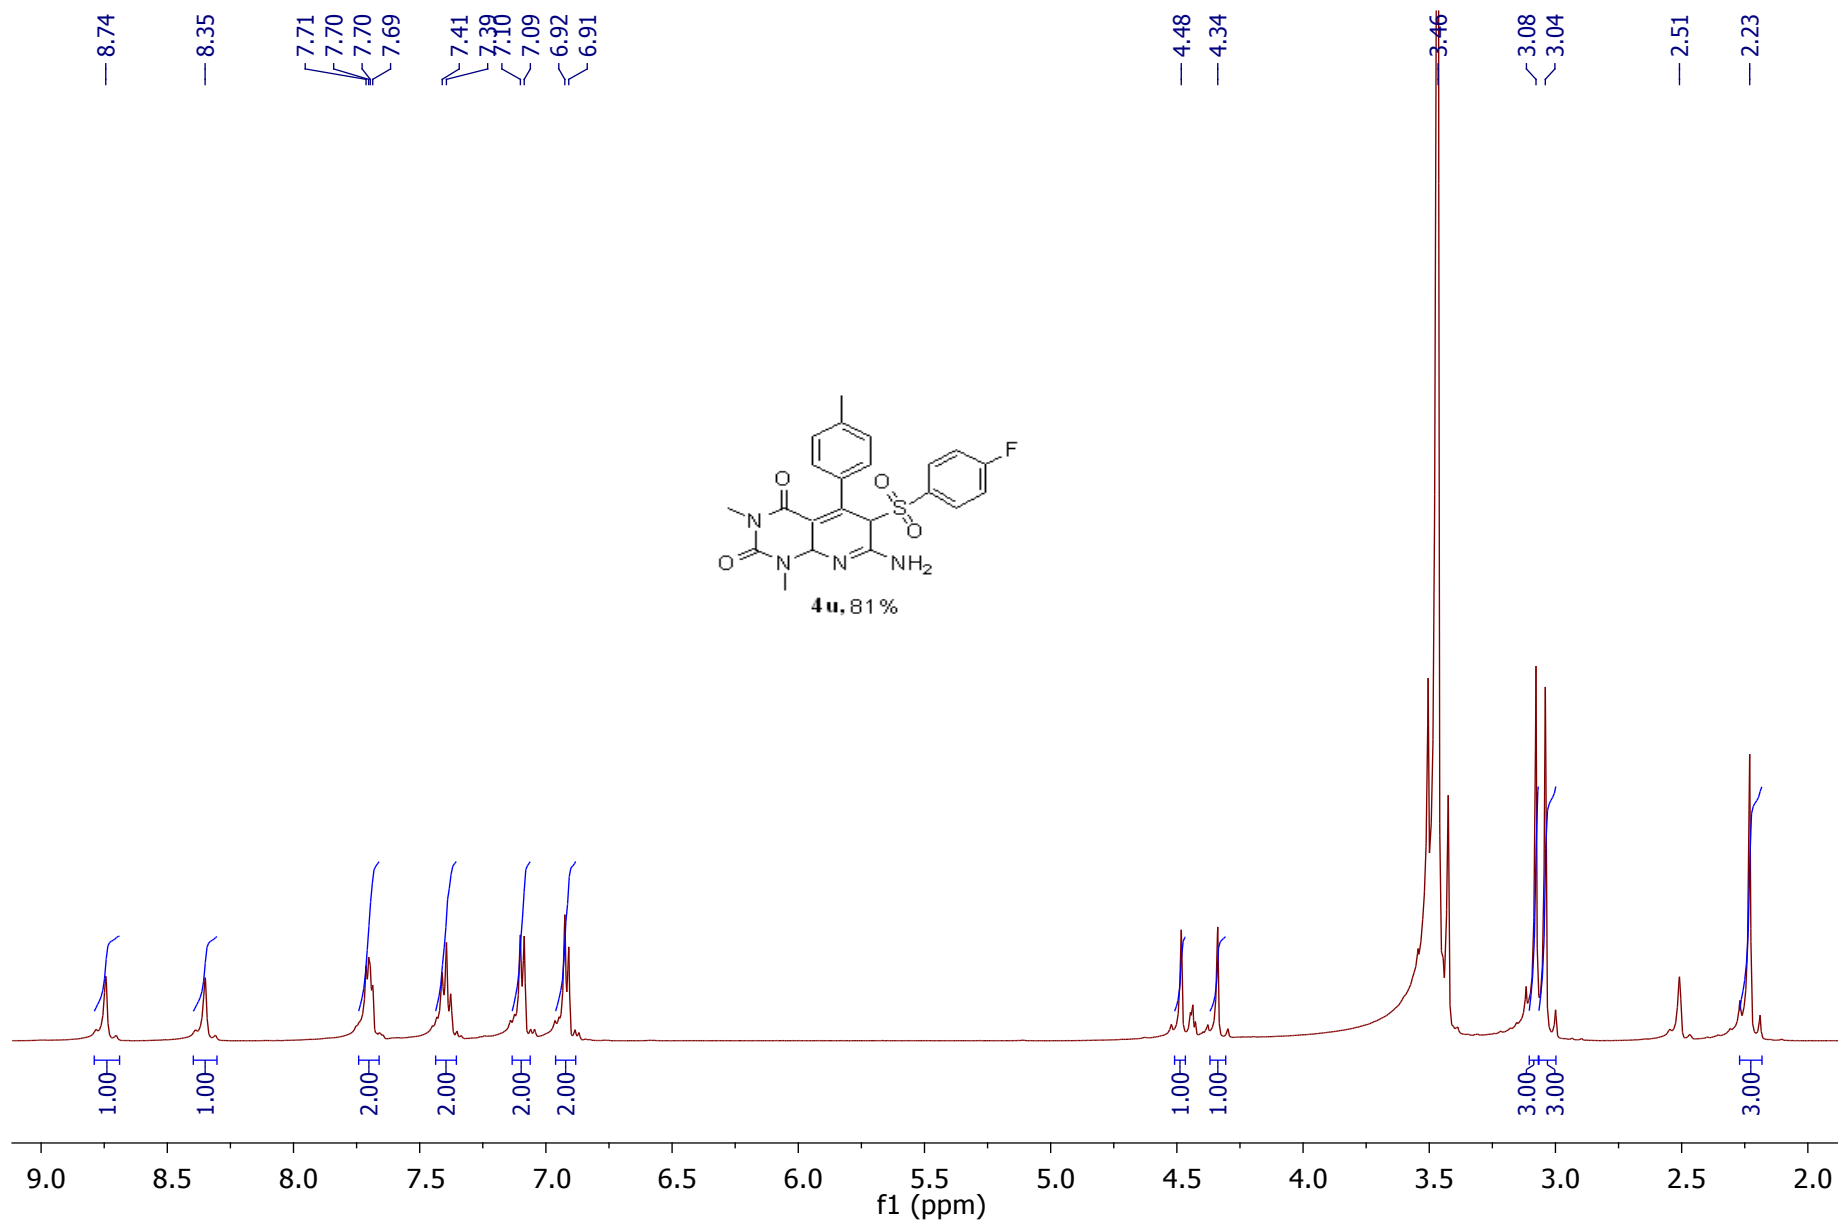

**Fig S-39:**  $^1\text{H}$  NMR Spectrum of Product **4u**

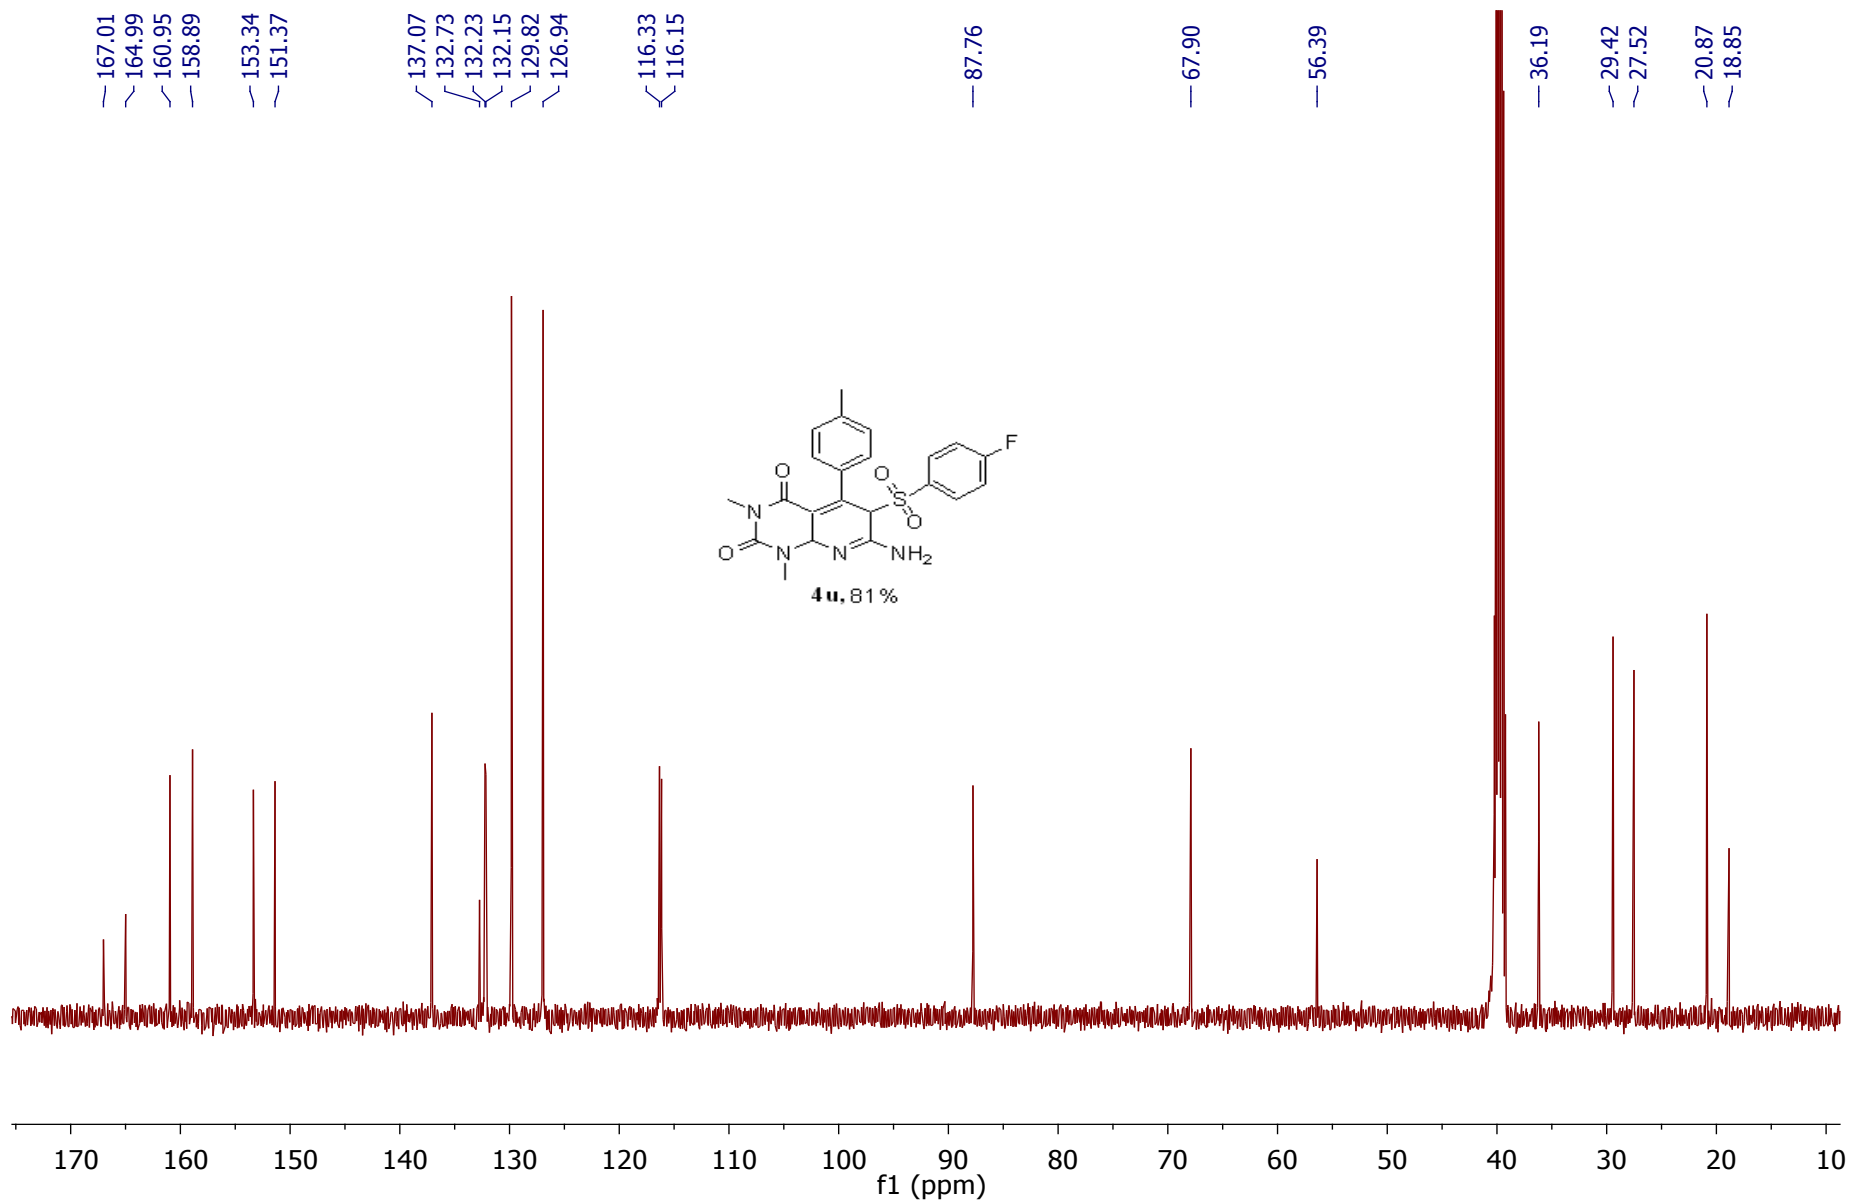

**Fig S-40:**  $^{13}\text{C}$  NMR Spectrum of Product **4u**

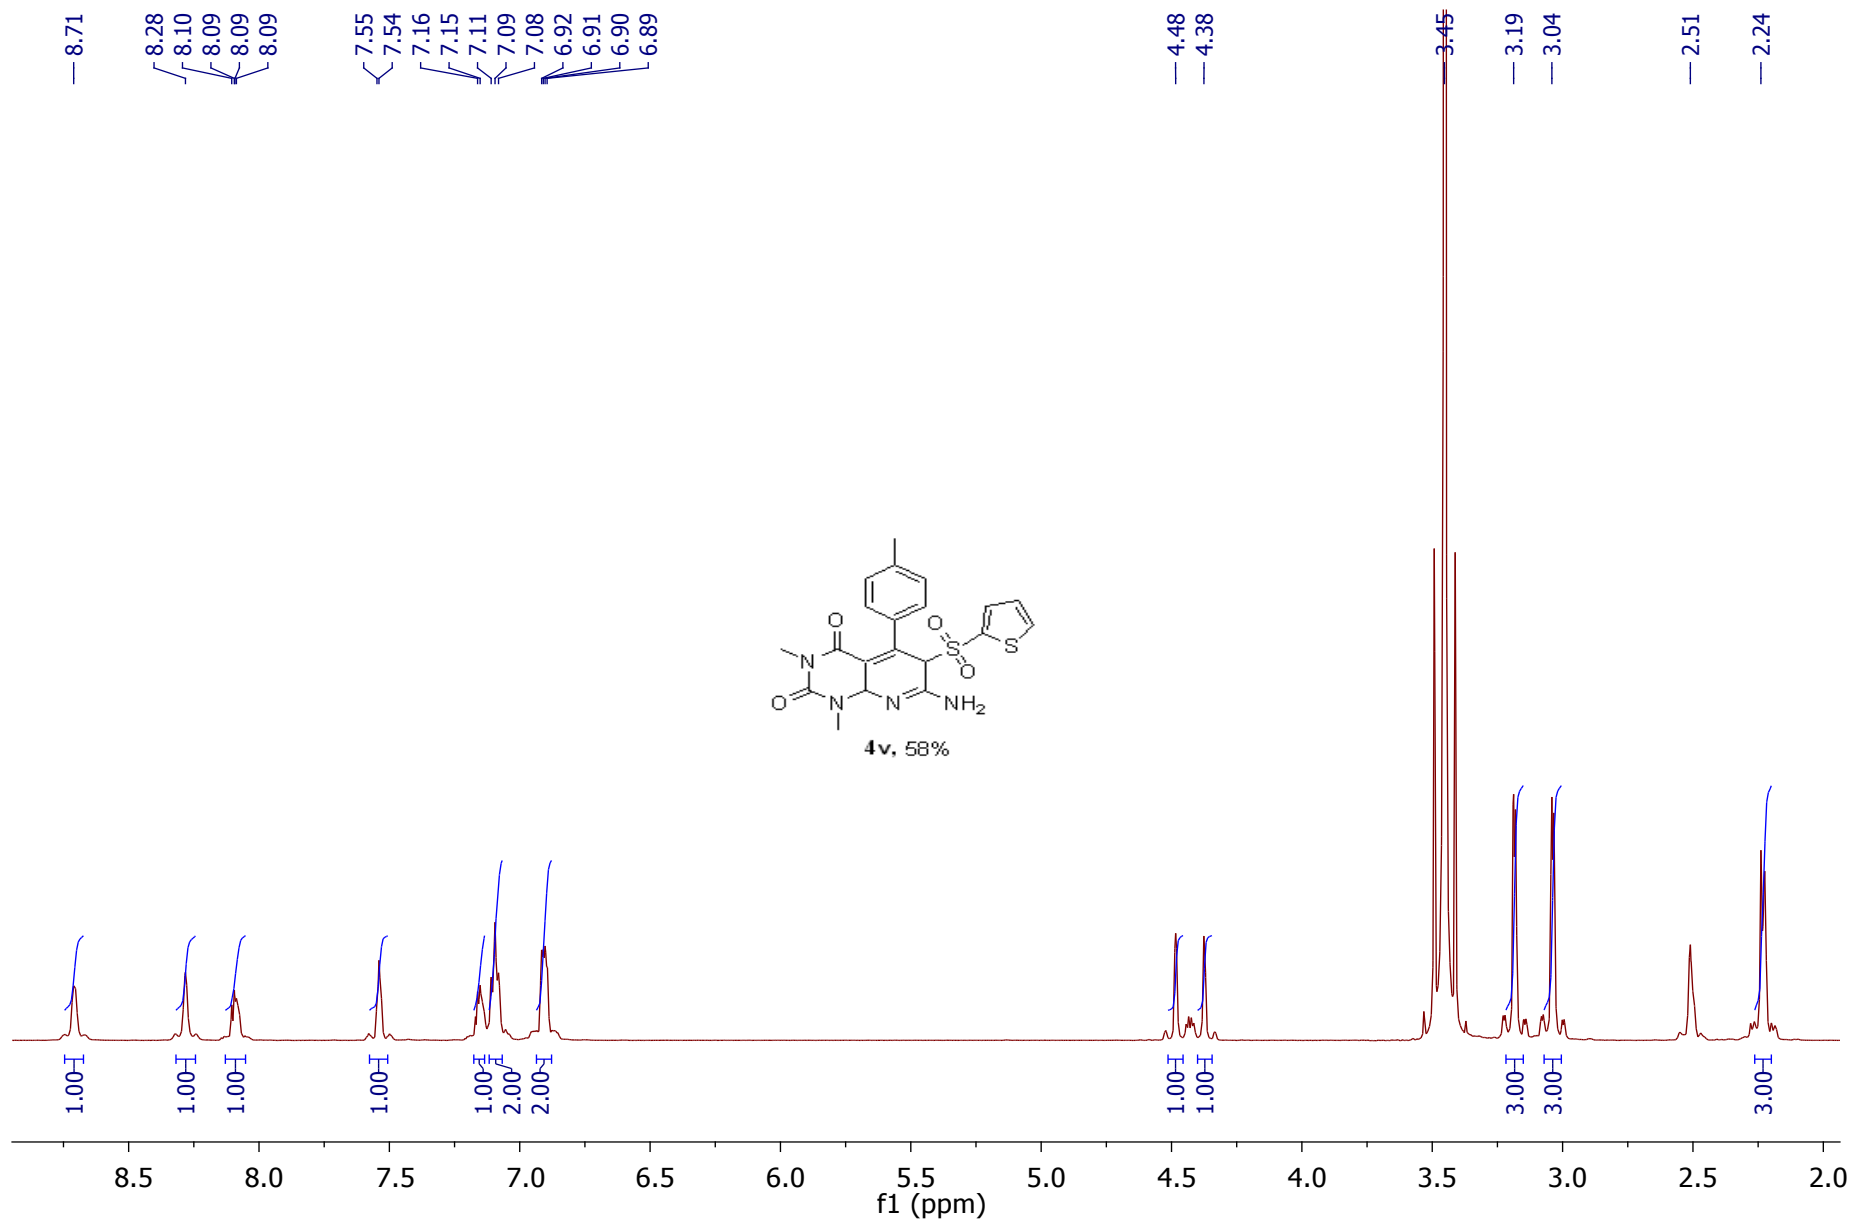

**Fig S-41:**  $^1\text{H}$  NMR Spectrum of Product **4v**

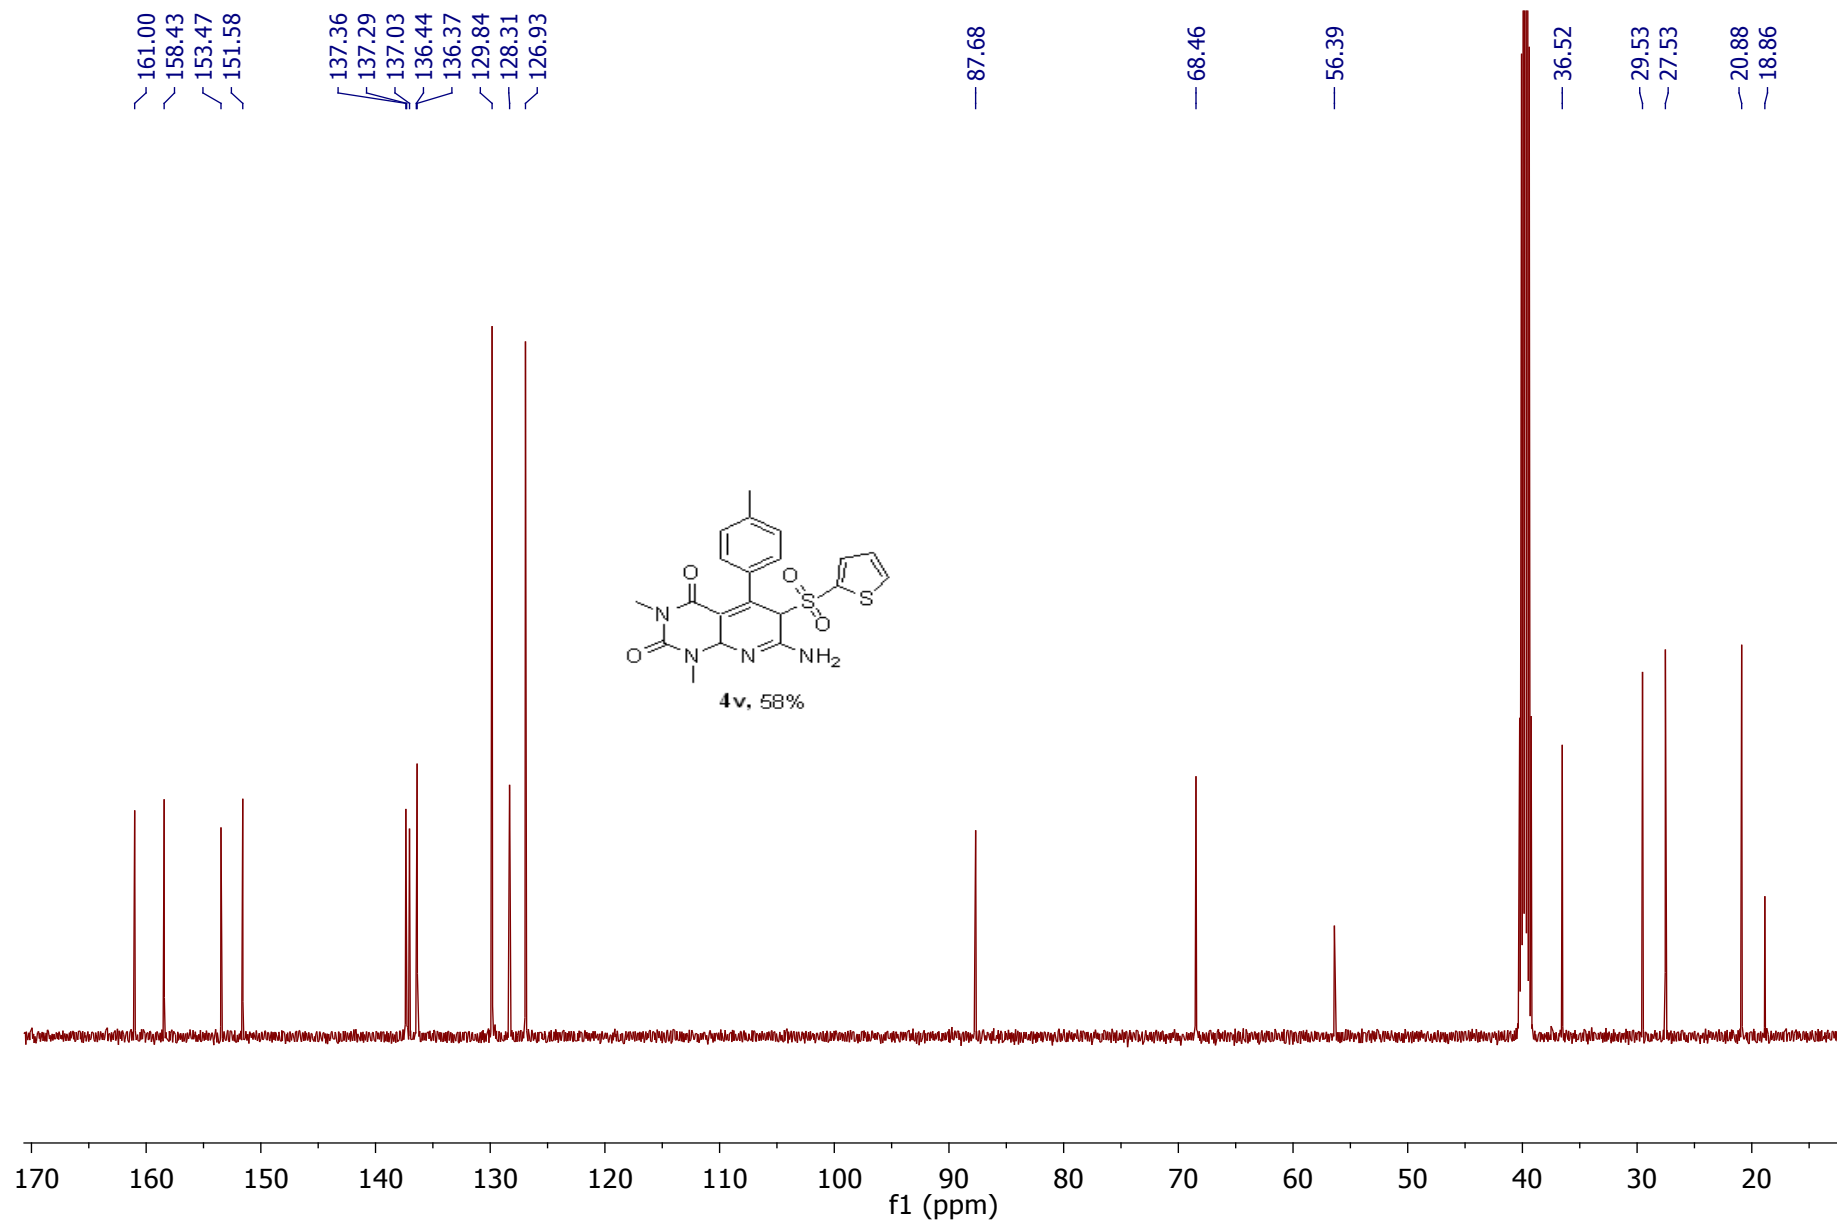

Fig S-42:  $^{13}\text{C}$  NMR Spectrum of Product 4v

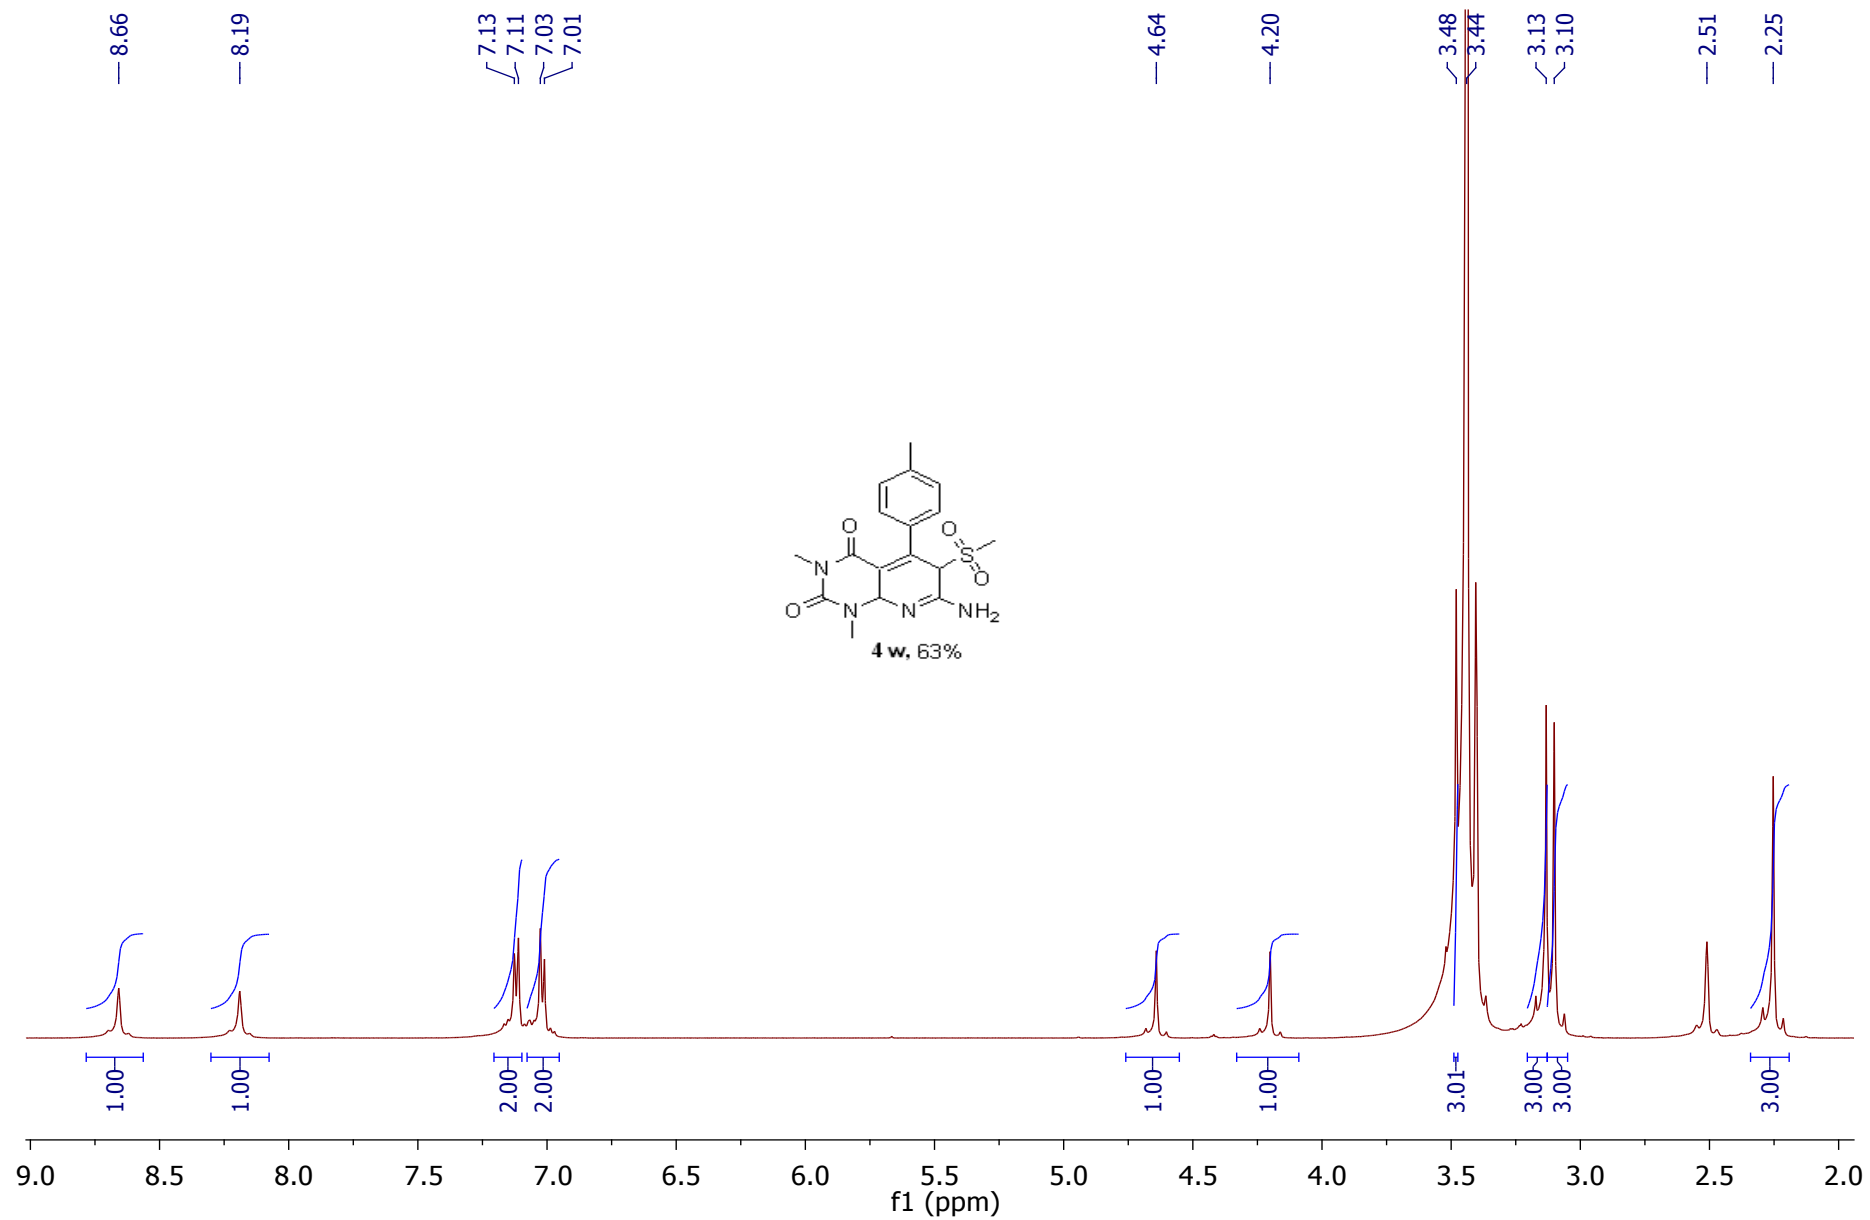

**Fig S-43:** <sup>1</sup>H NMR Spectrum of Product **4w**



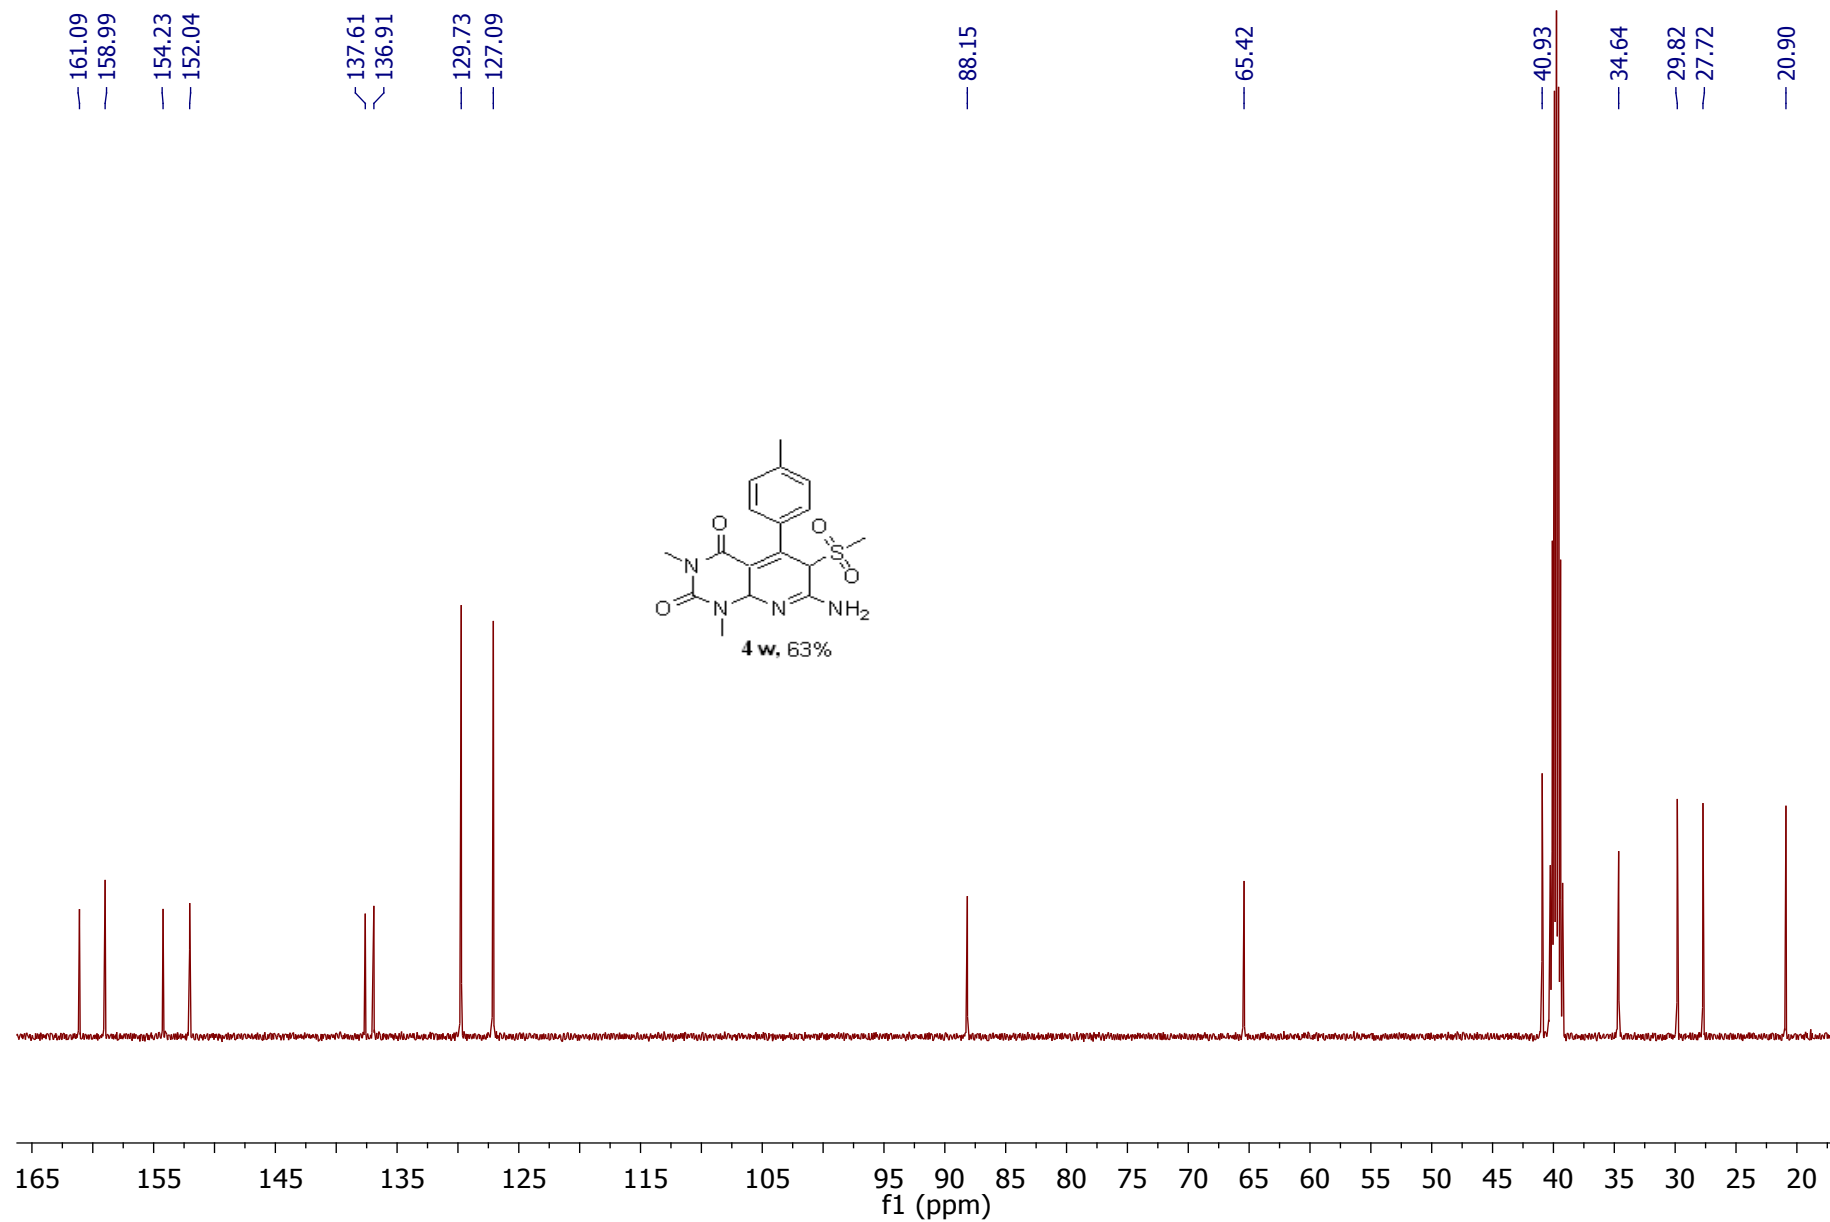

**Fig S-44:**  $^{13}\text{C}$  NMR Spectrum of Product **4w**

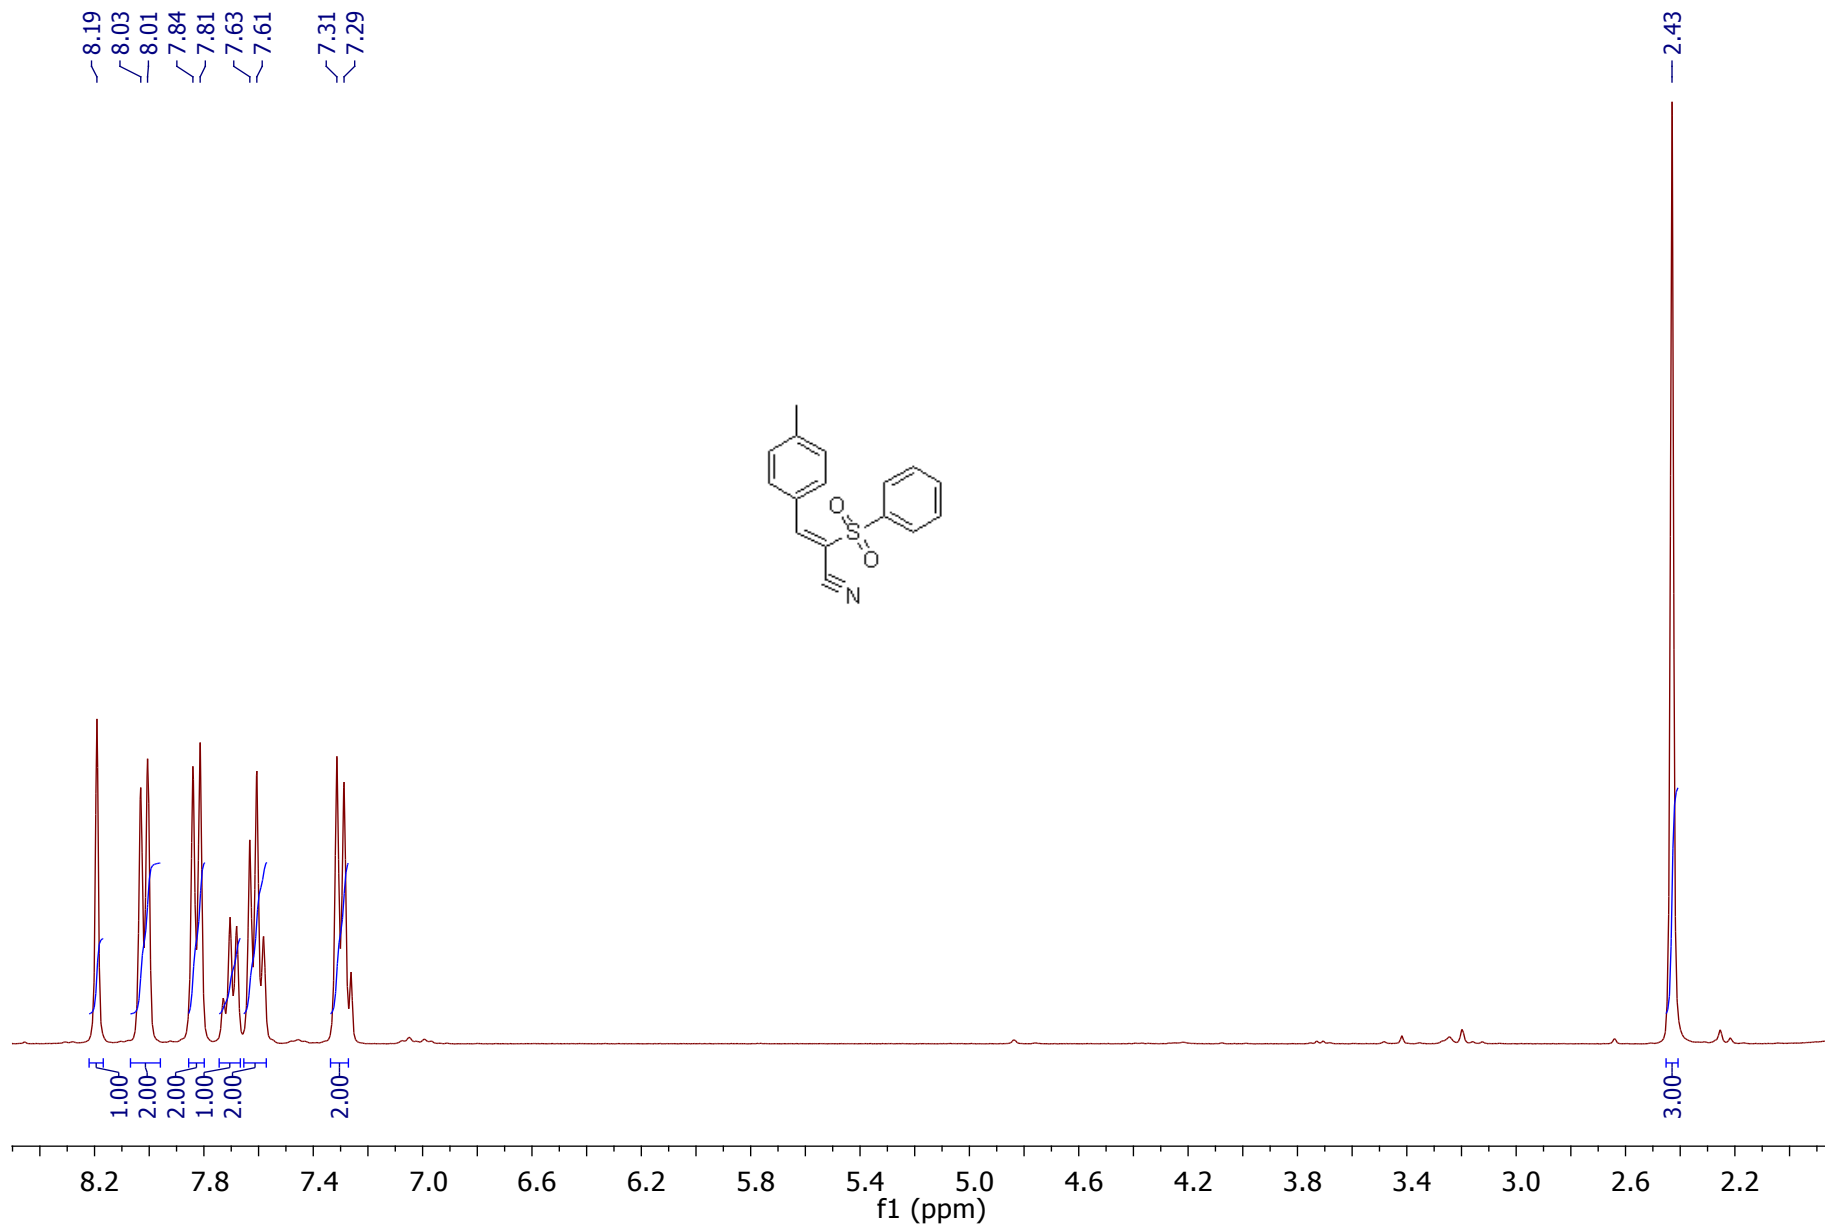

**Fig S-45:**  $^1\text{H}$ NMR Spectrum of Knoevenagel Product A
